# Supplementary material for: A versatile stereocontrolled synthesis of 2-deoxyiminosugar C-glycosides and their evaluation as glycosidase inhibitors
Source: Royal Society of Chemistry journal article supplement (doi:10.1039/d0ob02249g), 2020-12-18
Supplement: d0ob02249g1.pdf [file d0ob02249g1.pdf]

## SUPPLEMENTARY INFORMATION

### **A Versatile Stereocontrolled Synthesis of 2-Deoxyiminosugar C-Glycosides and their Evaluation as Glycosidases Inhibitors**

Alexandre Lumbroso,<sup>a</sup> Clément Berthonneau,<sup>a</sup> Isabelle Beaudet,<sup>a</sup> Jean-Paul Quintard,<sup>a</sup>  
Aurélien Planchat,<sup>a</sup> M. Isabel García-Moreno,<sup>b</sup> Carmen Ortiz-Mellet,<sup>b</sup> Erwan Le Grogne<sup>a\*</sup>

<sup>a</sup> Université de Nantes, CNRS, CEISAM, UMR 6230, 44000 Nantes, France.  
e-mail: [erwan.legrogne@univ-nantes.fr](mailto:erwan.legrogne@univ-nantes.fr)

<sup>b</sup> Department of Organic Chemistry, Faculty of Chemistry, University of Seville, c/ Professor García  
Gonzalez 1, 41012, Seville, Spain

# Table of Contents

|                                                                                                                         |    |
|-------------------------------------------------------------------------------------------------------------------------|----|
| <b>I-NMR spectra and NOESY analysis</b> .....                                                                           | 5  |
| <sup>1</sup> H NMR of compound <b>3</b> (400 MHz, CDCl <sub>3</sub> , 300K) .....                                       | 5  |
| <sup>13</sup> C NMR of compound <b>3</b> (100 MHz, CDCl <sub>3</sub> , 300K) .....                                      | 6  |
| <sup>1</sup> H NMR of compound <b>4</b> (400 MHz, CDCl <sub>3</sub> , 300K) .....                                       | 7  |
| <sup>13</sup> C NMR of compound <b>4</b> (100 MHz, CDCl <sub>3</sub> , 300K) .....                                      | 8  |
| <sup>1</sup> H NMR of compound <b>5-<i>exo</i></b> (400 MHz, CDCl <sub>3</sub> , 300K) .....                            | 9  |
| <sup>13</sup> C NMR of compound <b>5-<i>exo</i></b> (100 MHz, CDCl <sub>3</sub> , 300K) .....                           | 10 |
| <sup>1</sup> H NMR of compound <b>5-<i>endo</i></b> (400 MHz, CDCl <sub>3</sub> , 300K) .....                           | 11 |
| <sup>13</sup> C NMR of compound <b>5-<i>endo</i></b> (100 MHz, CDCl <sub>3</sub> , 300K) .....                          | 12 |
| <sup>1</sup> H NMR of compound <b>6-<i>exo</i></b> (300 MHz, CDCl <sub>3</sub> , 300K) .....                            | 13 |
| <sup>13</sup> C NMR of compound <b>6-<i>exo</i></b> (75 MHz, CDCl <sub>3</sub> , 300K) .....                            | 14 |
| <sup>1</sup> H NMR of compound <b>6-<i>endo</i></b> (300 MHz, CDCl <sub>3</sub> , 300K) .....                           | 15 |
| <sup>13</sup> C NMR of compound <b>6-<i>endo</i></b> (75 MHz, CDCl <sub>3</sub> , 300K) .....                           | 16 |
| <sup>1</sup> H NMR of compound <b>9</b> (400 MHz, CDCl <sub>3</sub> , 300K) .....                                       | 17 |
| <sup>13</sup> C NMR of compound <b>9</b> (100 MHz, CDCl <sub>3</sub> , 300K) .....                                      | 18 |
| <sup>1</sup> H NMR of compound <b>10</b> (400 MHz, CDCl <sub>3</sub> , 300K) .....                                      | 19 |
| <sup>13</sup> C NMR spectrum of compound <b>10</b> (100 MHz, CDCl <sub>3</sub> , 300K) .....                            | 20 |
| <sup>1</sup> H NMR of compound <b>11</b> (400 MHz, CDCl <sub>3</sub> , 300K) .....                                      | 21 |
| <sup>13</sup> C NMR compound <b>11</b> (100 MHz, CDCl <sub>3</sub> , 300K) .....                                        | 22 |
| <sup>1</sup> H NMR of compound <b>12</b> (300 MHz, CDCl <sub>3</sub> , 300K) .....                                      | 23 |
| <sup>13</sup> C NMR of compound <b>12</b> (75 MHz, CDCl <sub>3</sub> , 300K) .....                                      | 24 |
| <sup>1</sup> H NMR of compound <b>13</b> in (300 MHz, CDCl <sub>3</sub> , 300K) .....                                   | 25 |
| <sup>13</sup> C NMR of compound <b>13</b> (75 MHz, CDCl <sub>3</sub> , 300K) .....                                      | 26 |
| <sup>1</sup> H NMR of compound <b>14</b> (400 MHz, CDCl <sub>3</sub> , 300K) .....                                      | 27 |
| <sup>13</sup> C NMR of compound <b>14</b> (100 MHz, CDCl <sub>3</sub> , 300K) .....                                     | 28 |
| <sup>1</sup> H NMR of compound <b>15</b> (400 MHz, CD <sub>3</sub> OD, 300K) .....                                      | 29 |
| <sup>13</sup> C NMR of compound <b>15</b> (100 MHz, CD <sub>3</sub> OD, 300K) .....                                     | 30 |
| <sup>1</sup> H NMR of compound <b>16</b> (400 MHz, CD <sub>3</sub> OD, 300K) .....                                      | 31 |
| <sup>13</sup> C NMR of compound <b>16</b> (100 MHz, CD <sub>3</sub> OD, 300K) .....                                     | 32 |
| <sup>1</sup> H NMR of compound <b>17</b> ( <i>dr</i> = 67/33) in (300 MHz, CDCl <sub>3</sub> , 300K) .....              | 33 |
| <sup>13</sup> C NMR of compound <b>17</b> ( <i>dr</i> = 67/33) (75 MHz, CDCl <sub>3</sub> , 300K) .....                 | 34 |
| <sup>1</sup> H NMR of compound <b>18</b> in (300 MHz, CDCl <sub>3</sub> , 300K) .....                                   | 35 |
| <sup>13</sup> C NMR of compound <b>18</b> (75 MHz, CDCl <sub>3</sub> , 300K) .....                                      | 36 |
| <sup>1</sup> H NMR of compound <b>19'</b> (400 MHz, CDCl <sub>3</sub> , 300K) obtained from <b>19-<i>exo</i></b> .....  | 37 |
| <sup>13</sup> C NMR of compound <b>19'</b> (100 MHz, CDCl <sub>3</sub> , 300K) obtained from <b>19-<i>exo</i></b> ..... | 38 |
| <sup>1</sup> H NMR compound <b>19-<i>endo</i></b> (300 MHz, CDCl <sub>3</sub> , 300K) .....                             | 39 |
| <sup>13</sup> C NMR compound <b>19-<i>endo</i></b> (75 MHz, CDCl <sub>3</sub> , 300K) .....                             | 40 |
| <sup>1</sup> H NMR of compound <b>20-<i>exo</i></b> (400 MHz, CDCl <sub>3</sub> , 300K) .....                           | 41 |
| <sup>13</sup> C NMR of compound <b>20-<i>exo</i></b> (100 MHz, CDCl <sub>3</sub> , 300K) .....                          | 42 |
| <sup>1</sup> H NMR of compound <b>20-<i>endo</i></b> (300 MHz, CDCl <sub>3</sub> , 300K) .....                          | 43 |
| <sup>13</sup> C NMR of compound <b>20-<i>endo</i></b> (100 MHz, CDCl <sub>3</sub> , 300K) .....                         | 44 |
| Discrimination between <i>exo</i> and <i>endo</i> epoxides .....                                                        | 45 |
| <sup>1</sup> H NMR of compound <b>21</b> (300 MHz, CDCl <sub>3</sub> , 300K) .....                                      | 46 |
| <sup>13</sup> C NMR of compound <b>21</b> (75 MHz, CDCl <sub>3</sub> , 300K) .....                                      | 47 |

|                                                                                                                                                                     |    |
|---------------------------------------------------------------------------------------------------------------------------------------------------------------------|----|
| <sup>1</sup> H NMR spectrum of compound <b>22</b> (400 MHz, CDCl <sub>3</sub> , 300K).....                                                                          | 48 |
| <sup>13</sup> C NMR of compound <b>22</b> (100 MHz, CDCl <sub>3</sub> , 300K) .....                                                                                 | 49 |
| <sup>1</sup> H NMR of compound <b>23</b> (400 MHz, CD <sub>3</sub> OD, 300K) .....                                                                                  | 50 |
| <sup>13</sup> C NMR of compound <b>23</b> (100 MHz, CD <sub>3</sub> OD, 300K) .....                                                                                 | 51 |
| <sup>13</sup> C NMR of compound <b>24</b> (100 MHz, CH <sub>3</sub> OD, 300K) .....                                                                                 | 53 |
| <sup>1</sup> H NMR of compound <b>25</b> (400 MHz, CD <sub>3</sub> OD, 300K) .....                                                                                  | 54 |
| <sup>13</sup> C NMR of compound <b>25</b> (100 MHz, CD <sub>3</sub> OD, 300K) .....                                                                                 | 55 |
| <sup>1</sup> H NMR of compound <b>26</b> (300 MHz, CD <sub>3</sub> OD, 300K) .....                                                                                  | 56 |
| <sup>13</sup> C NMR of compound <b>26</b> (75 MHz, CD <sub>3</sub> OD, 300K) .....                                                                                  | 57 |
| <sup>1</sup> H NMR of compound <b>27</b> (400MHz, CD <sub>3</sub> OD, 300K) .....                                                                                   | 58 |
| <sup>13</sup> C NMR of compound <b>27</b> (100 MHz, CD <sub>3</sub> OD, 300K) .....                                                                                 | 59 |
| <sup>1</sup> H NMR of compound <b>28</b> (400MHz, CD <sub>3</sub> OD, 300K) .....                                                                                   | 60 |
| <sup>13</sup> C NMR of compound <b>28</b> (100 MHz, CD <sub>3</sub> OD, 300K) .....                                                                                 | 61 |
| <sup>1</sup> H NMR of compound <b>29</b> (400 MHz, CD <sub>3</sub> OD, 300K) .....                                                                                  | 62 |
| <sup>13</sup> C NMR of compound <b>29</b> (100 MHz, CD <sub>3</sub> OD, 300K) .....                                                                                 | 63 |
| <sup>1</sup> H NMR of compound <b>30</b> (300 MHz, CD <sub>3</sub> OD, 300K) .....                                                                                  | 64 |
| <sup>13</sup> C NMR of compound <b>30</b> (75 MHz, CD <sub>3</sub> OD, 300K) .....                                                                                  | 65 |
| <sup>1</sup> H NMR of compound <b>31</b> (400 MHz, CD <sub>3</sub> OD, 300K) .....                                                                                  | 66 |
| <sup>13</sup> C NMR of compound <b>31</b> (100 MHz, CD <sub>3</sub> OD, 300K) .....                                                                                 | 67 |
| <sup>1</sup> H NMR of compound <b>32</b> (400 MHz, CD <sub>3</sub> OD, 300K) .....                                                                                  | 68 |
| <sup>13</sup> C NMR of compound <b>32</b> (100 MHz, CD <sub>3</sub> OD, 300K) .....                                                                                 | 69 |
| <sup>1</sup> H NMR of compound <b>35</b> (400 MHz, CD <sub>3</sub> OD, 300K) .....                                                                                  | 70 |
| <sup>13</sup> C NMR of compound <b>35</b> (100 MHz, CD <sub>3</sub> OD, 300K) .....                                                                                 | 71 |
| <b>II- Dixon and Lineweaver-Burk plots for K<sub>i</sub> determination</b> .....                                                                                    | 72 |
| <b>Figure S1.</b> Dixon Plot for K <sub>i</sub> determination (473 ± 50 μM) of <b>23</b> against <i>bovine liver</i> β-galactosidase. ....                          | 72 |
| <b>Figure S2.</b> Dixon Plot for K <sub>i</sub> determination (652 ± 55 μM) of <b>24</b> against <i>bovine liver</i> β-galactosidase. ....                          | 72 |
| <b>Figure S3.</b> Dixon Plot for K <sub>i</sub> determination (10 ± 0.2 μM) of <b>25</b> against <i>bovine liver</i> β-galactosidase. ....                          | 72 |
| <b>Figure S4.</b> Dixon Plot for K <sub>i</sub> determination (475 ± 45 μM) of <b>33</b> against <i>bovine liver</i> β-galactosidase. ....                          | 73 |
| <b>Figure S5.</b> Dixon Plot for K <sub>i</sub> determination (301 ± 25 μM) of <b>26</b> against <i>bovine liver</i> β-galactosidase. ....                          | 73 |
| <b>Figure S6.</b> Lineweaver-Burk Plot for K <sub>i</sub> determination (1.3 ± 0.1 μM) of <b>27</b> against <i>bovine liver</i> β-galactosidase/β-glucosidase. .... | 73 |
| <b>Figure S7.</b> Dixon Plot for K <sub>i</sub> determination (42 ± 4 μM) of <b>28</b> against <i>bovine liver</i> β-galactosidase/β-glucosidase. ....              | 74 |
| <b>Figure S8.</b> Lineweaver-Burk Plot for K <sub>i</sub> determination (12.1 ± 2 μM) of <b>29</b> against <i>bovine liver</i> β-galactosidase/β-glucosidase. ....  | 74 |
| <b>Figure S9.</b> Dixon Plot for K <sub>i</sub> determination (58 ± 6 μM) of <b>30</b> against <i>bovine liver</i> β-galactosidase. ....                            | 74 |
| <b>Figure S10.</b> Dixon Plot for K <sub>i</sub> determination (594 ± 60 μM) of <b>34</b> against <i>bovine liver</i> β-galactosidase. ....                         | 75 |
| <b>Figure S11.</b> Dixon Plot for K <sub>i</sub> determination (195 ± 20 μM) of <b>35</b> against <i>bovine liver</i> β-galactosidase. ....                         | 75 |
| <b>Figure S12.</b> Dixon Plot for K <sub>i</sub> determination (46 ± 3 μM) of <b>24</b> against <i>almonds</i> β-glucosidase. ....                                  | 75 |
| <b>Figure S13.</b> Dixon Plot for K <sub>i</sub> determination (252 ± 20 μM) of <b>25</b> against <i>almonds</i> β-glucosidase.....                                 | 76 |
| <b>Figure S14.</b> Dixon Plot for K <sub>i</sub> determination (693 ± 65 μM) of <b>26</b> against <i>almonds</i> β-glucosidase.....                                 | 76 |
| <b>Figure S15.</b> Dixon Plot for K <sub>i</sub> determination (36 ± 4 μM) of <b>27</b> against <i>almonds</i> β-glucosidase.....                                   | 76 |
| <b>Figure S16.</b> Lineweaver-Burk Plot for K <sub>i</sub> determination (11.4 ± 2 μM) of <b>28</b> against <i>almonds</i> β-glucosidase. ....                      | 77 |
| <b>Figure S17.</b> Lineweaver-Burk Plot for K <sub>i</sub> determination (18 ± 2 μM) of <b>29</b> against <i>almonds</i> β-glucosidase. ....                        | 77 |
| <b>Figure S18.</b> Dixon Plot for K <sub>i</sub> determination (436 ± 41 μM) of <b>30</b> against <i>almonds</i> β-glucosidase.....                                 | 77 |
| <b>Figure S19.</b> Dixon Plot for K <sub>i</sub> determination (537 ± 50 μM) of <b>34</b> against <i>almonds</i> β-glucosidase.....                                 | 78 |

|                                                                                                                                                                 |    |
|-----------------------------------------------------------------------------------------------------------------------------------------------------------------|----|
| <b>Figure S20.</b> Dixon Plot for $K_i$ determination ( $140 \pm 11 \mu\text{M}$ ) of <b>35</b> against <i>almonds</i> $\beta$ -glucosidase.....                | 78 |
| <b>Figure S21.</b> Dixon Plot for $K_i$ determination ( $33 \pm 3 \mu\text{M}$ ) of <b>23</b> against <i>green coffee beans</i> $\alpha$ -galactosidase. ....   | 78 |
| <b>Figure S22.</b> Dixon Plot for $K_i$ determination ( $36 \pm 5 \mu\text{M}$ ) of <b>24</b> against <i>green coffee beans</i> $\alpha$ -galactosidase. ....   | 79 |
| <b>Figure S23.</b> Dixon Plot for $K_i$ determination ( $313 \pm 28 \mu\text{M}$ ) of <b>25</b> against <i>green coffee beans</i> $\alpha$ -galactosidase. .... | 79 |
| <b>Figure S24.</b> Dixon Plot for $K_i$ determination ( $223 \pm 20 \mu\text{M}$ ) of <b>33</b> against <i>green coffee beans</i> $\alpha$ -galactosidase. .... | 79 |
| <b>Figure S25.</b> Dixon Plot for $K_i$ determination ( $153 \pm 12 \mu\text{M}$ ) of <b>24</b> against <i>Aspergillus niger</i> amyloglucosidase. ....         | 80 |
| <b>Figure S26.</b> Dixon Plot for $K_i$ determination ( $116 \pm 10 \mu\text{M}$ ) of <b>26</b> against <i>Aspergillus niger</i> amyloglucosidase. ....         | 80 |
| <b>Figure S27.</b> Dixon Plot for $K_i$ determination ( $463 \pm 40 \mu\text{M}$ ) of <b>27</b> against <i>Aspergillus niger</i> amyloglucosidase. ....         | 80 |
| <b>Figure S28.</b> Dixon Plot for $K_i$ determination ( $169 \pm 15 \mu\text{M}$ ) of <b>28</b> against <i>Aspergillus niger</i> amyloglucosidase. ....         | 81 |
| <b>Figure S29.</b> Dixon Plot for $K_i$ determination ( $1.4 \pm 0.1 \mu\text{M}$ ) of <b>34</b> against <i>Aspergillus niger</i> amyloglucosidase. ....        | 81 |
| <b>Figure S30.</b> Dixon Plot for $K_i$ determination ( $550 \pm 45 \mu\text{M}$ ) of <b>35</b> against <i>Aspergillus niger</i> amyloglucosidase. ....         | 81 |
| <b>Figure S31.</b> Dixon Plot for $K_i$ determination ( $22.8 \pm 1.9 \mu\text{M}$ ) of <b>32</b> against <i>Aspergillus niger</i> amyloglucosidase. ....       | 82 |
| <b>Figure S32.</b> Dixon Plot for $K_i$ determination ( $115 \pm 10 \mu\text{M}$ ) of <b>25</b> against <i>Penicilium decumbes</i> naringinase. ....            | 82 |
| <b>Figure S33.</b> Dixon Plot for $K_i$ determination ( $76 \pm 5 \mu\text{M}$ ) of <b>26</b> against <i>Penicilium decumbes</i> naringinase. ....              | 82 |
| <b>Figure S34.</b> Dixon Plot for $K_i$ determination ( $131 \pm 11 \mu\text{M}$ ) of <b>27</b> against <i>Penicilium decumbes</i> naringinase. ....            | 83 |
| <b>Figure S35.</b> Dixon Plot for $K_i$ determination ( $45 \pm 3 \mu\text{M}$ ) of <b>28</b> against <i>Penicilium decumbes</i> naringinase. ....              | 83 |
| <b>Figure S36.</b> Dixon Plot for $K_i$ determination ( $50 \pm 4 \mu\text{M}$ ) of <b>29</b> against <i>Penicilium decumbes</i> naringinase. ....              | 83 |
| <b>Figure S37.</b> Dixon Plot for $K_i$ determination ( $224 \pm 20 \mu\text{M}$ ) of <b>30</b> against <i>Penicilium decumbes</i> naringinase. ....            | 84 |
| <b>Figure S38.</b> Dixon Plot for $K_i$ determination ( $67 \pm 5 \mu\text{M}$ ) of <b>34</b> against <i>Penicilium decumbes</i> naringinase. ....              | 84 |
| <b>Figure S39.</b> Lineweaver-Burk Plot for $K_i$ determination ( $4.9 \pm 0.5 \mu\text{M}$ ) of <b>35</b> against <i>Penicilium decumbes</i> naringinase. .... | 84 |
| <b>Figure S40.</b> Dixon Plot for $K_i$ determination ( $272 \pm 25 \mu\text{M}$ ) of <b>32</b> against <i>Penicilium decumbes</i> naringinase. ....            | 85 |

# 1-NMR spectra and NOESY analysis

<sup>1</sup>H NMR of compound 3 (400 MHz, CDCl<sub>3</sub>, 300K)

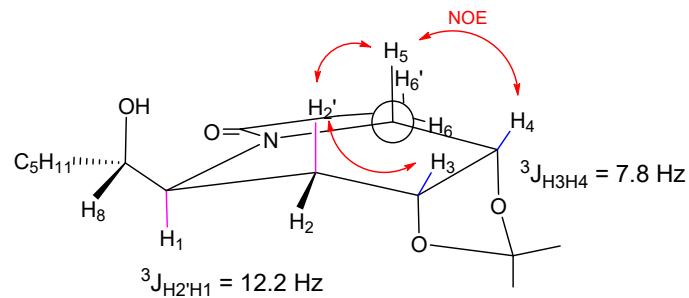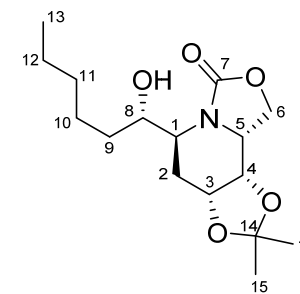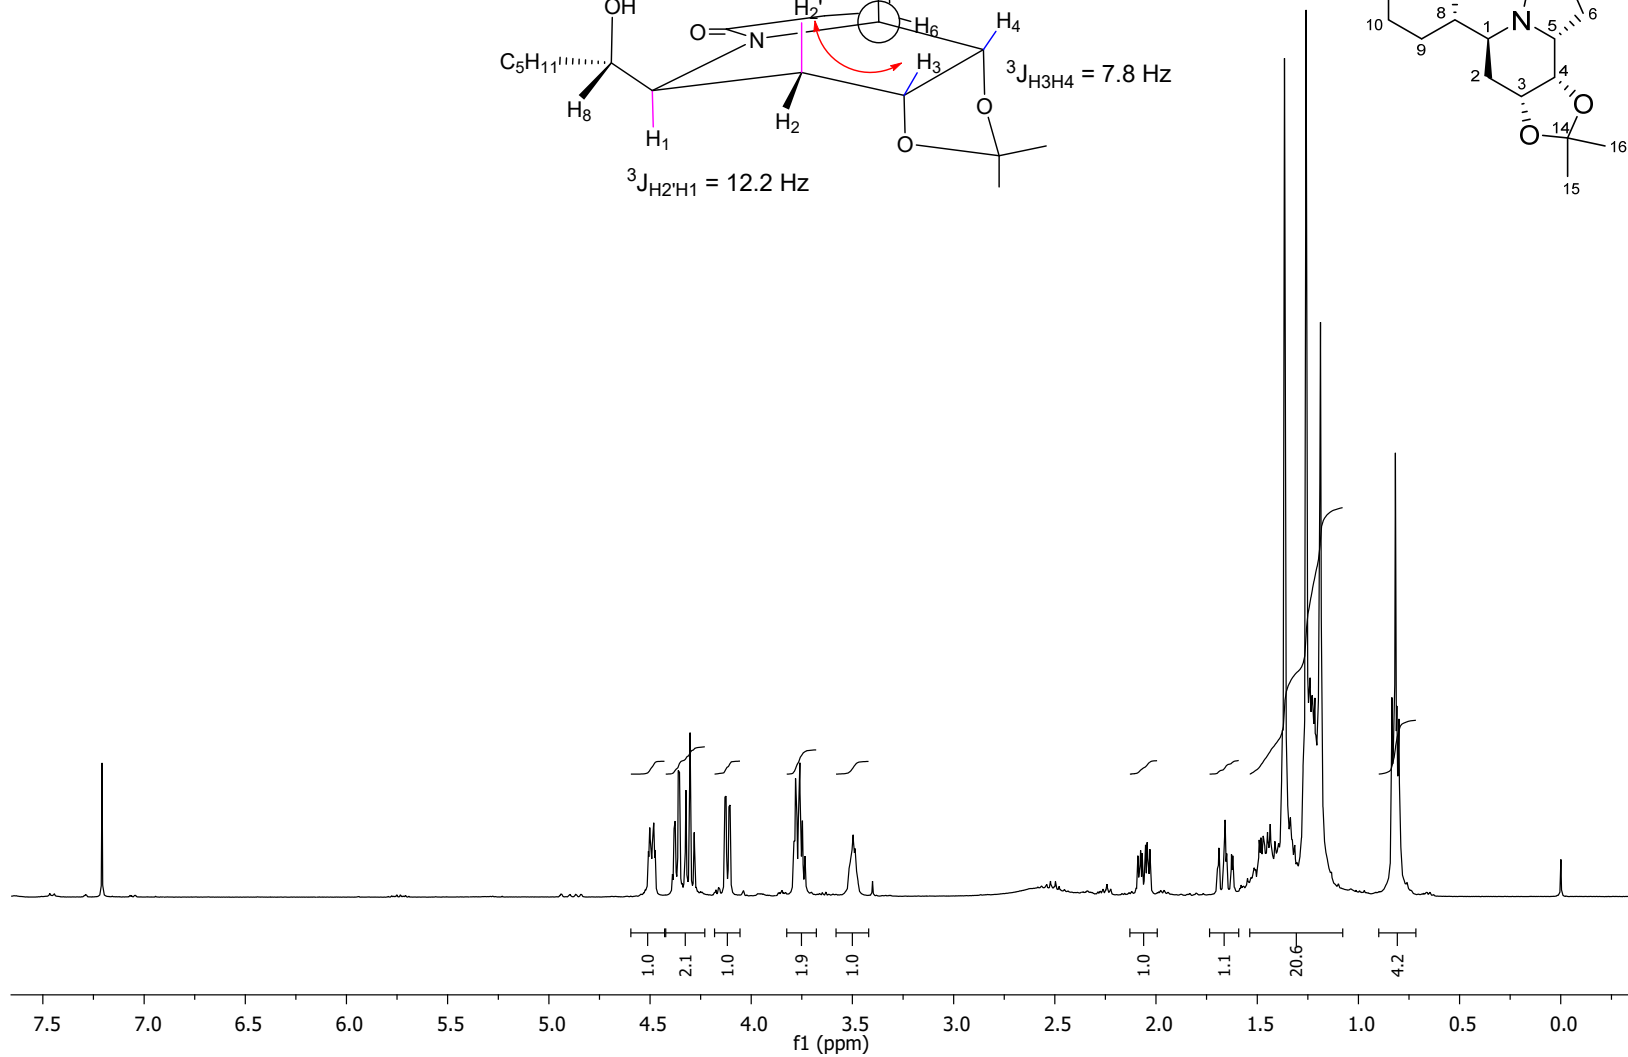

$^{13}\text{C}$  NMR of compound **3** (100 MHz,  $\text{CDCl}_3$ , 300K)

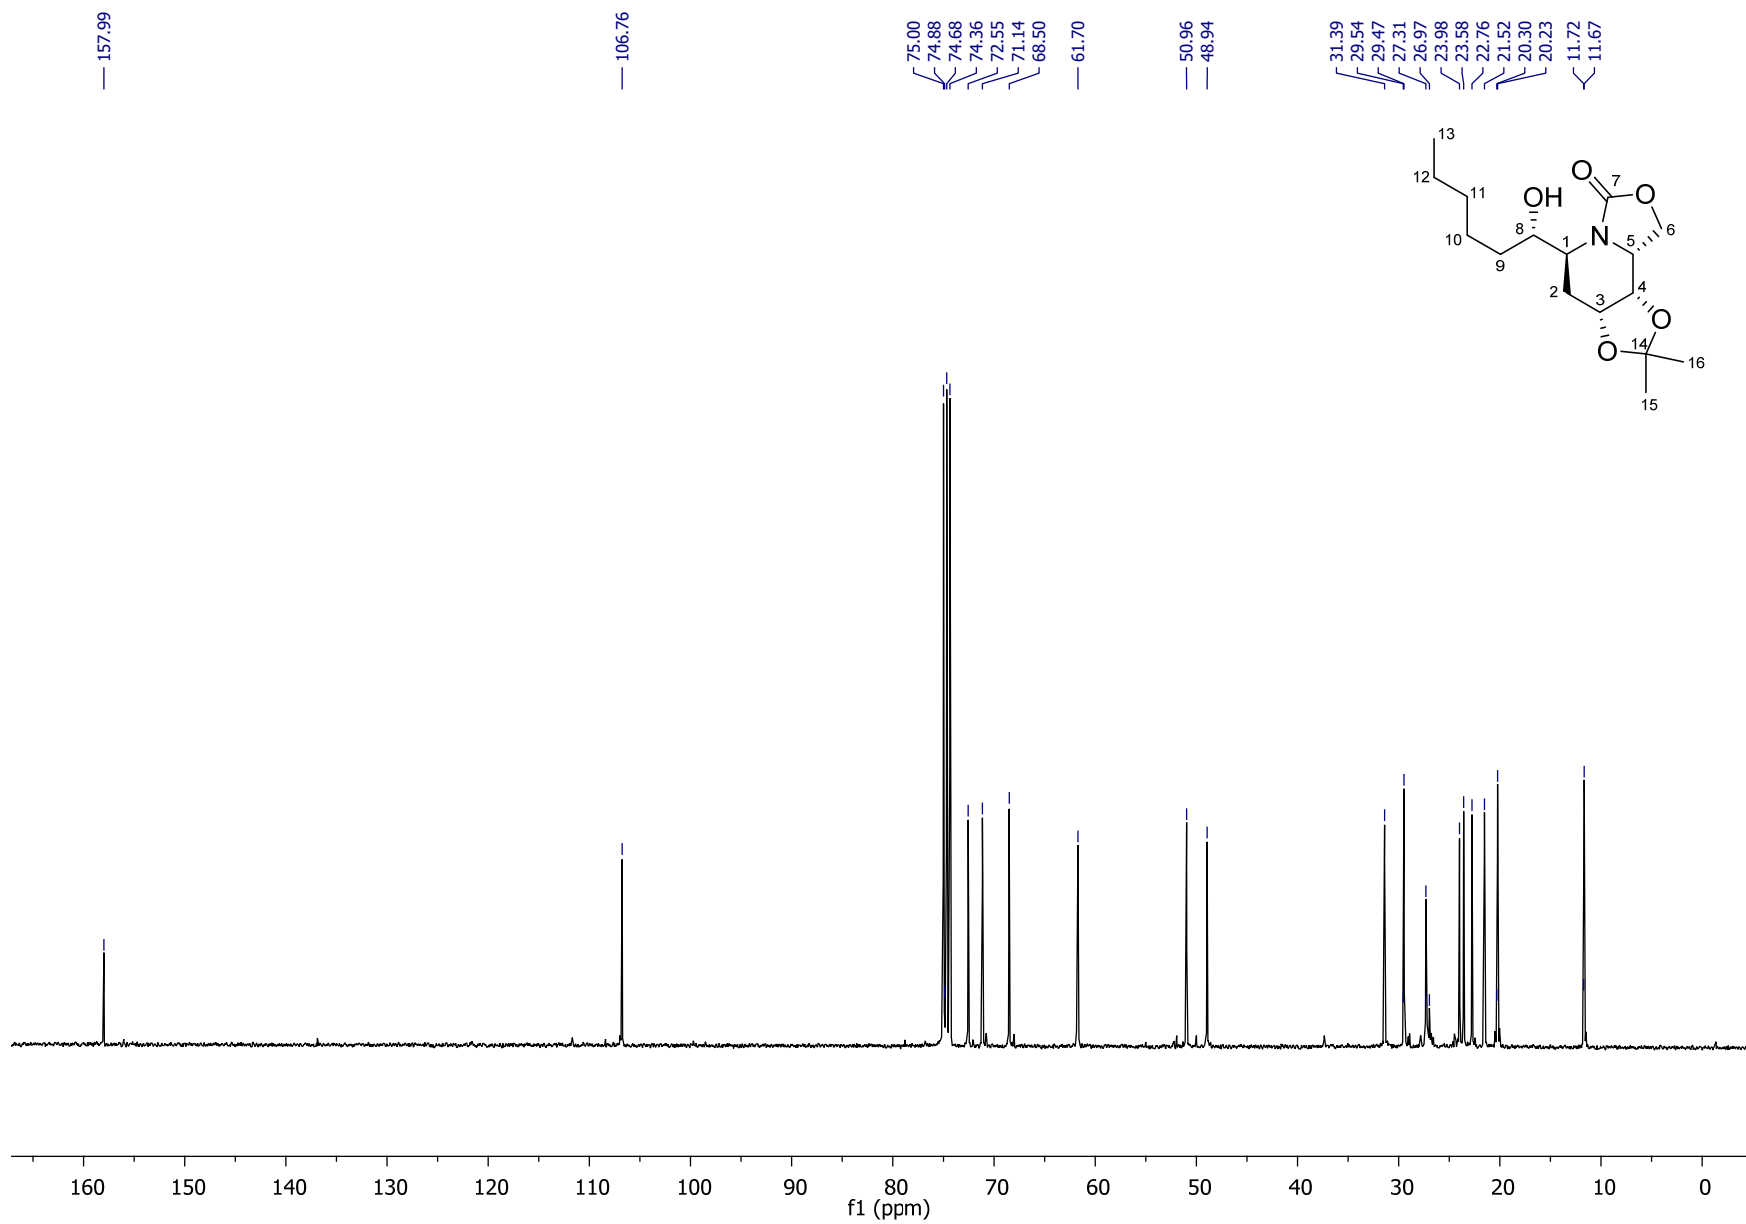

$^1\text{H}$  NMR of compound **4** (400 MHz,  $\text{CDCl}_3$ , 300K)

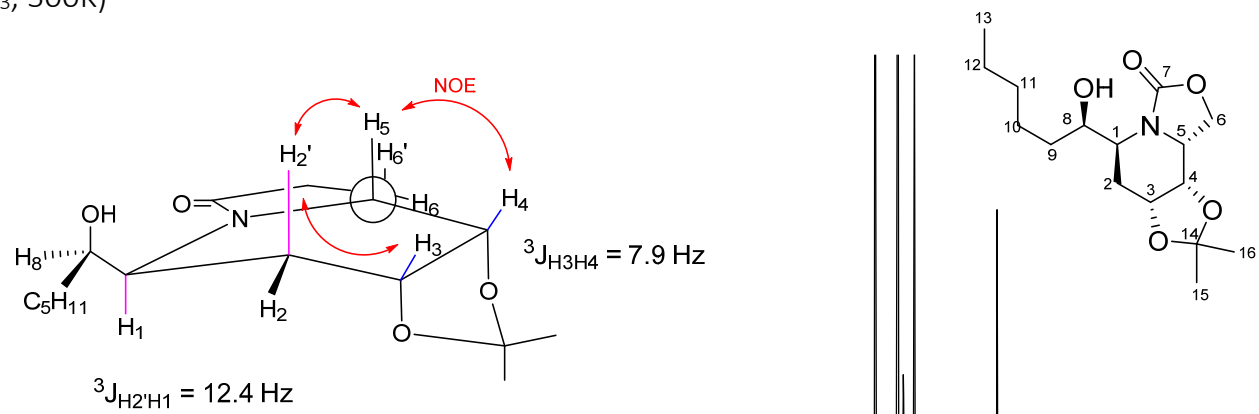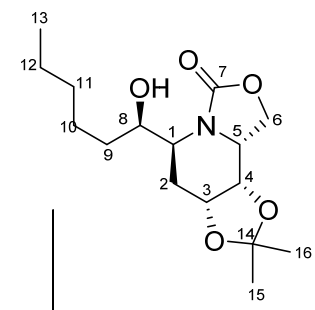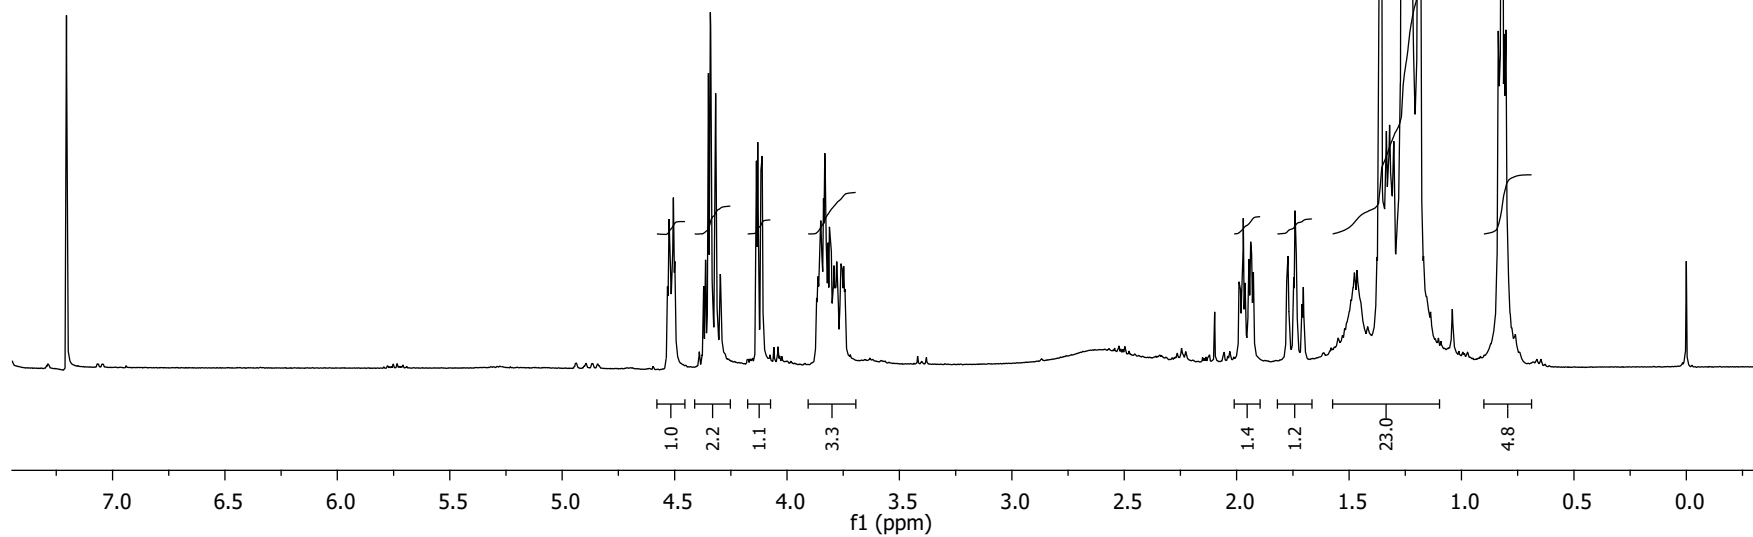

$^{13}\text{C}$  NMR of compound **4** (100 MHz,  $\text{CDCl}_3$ , 300K)

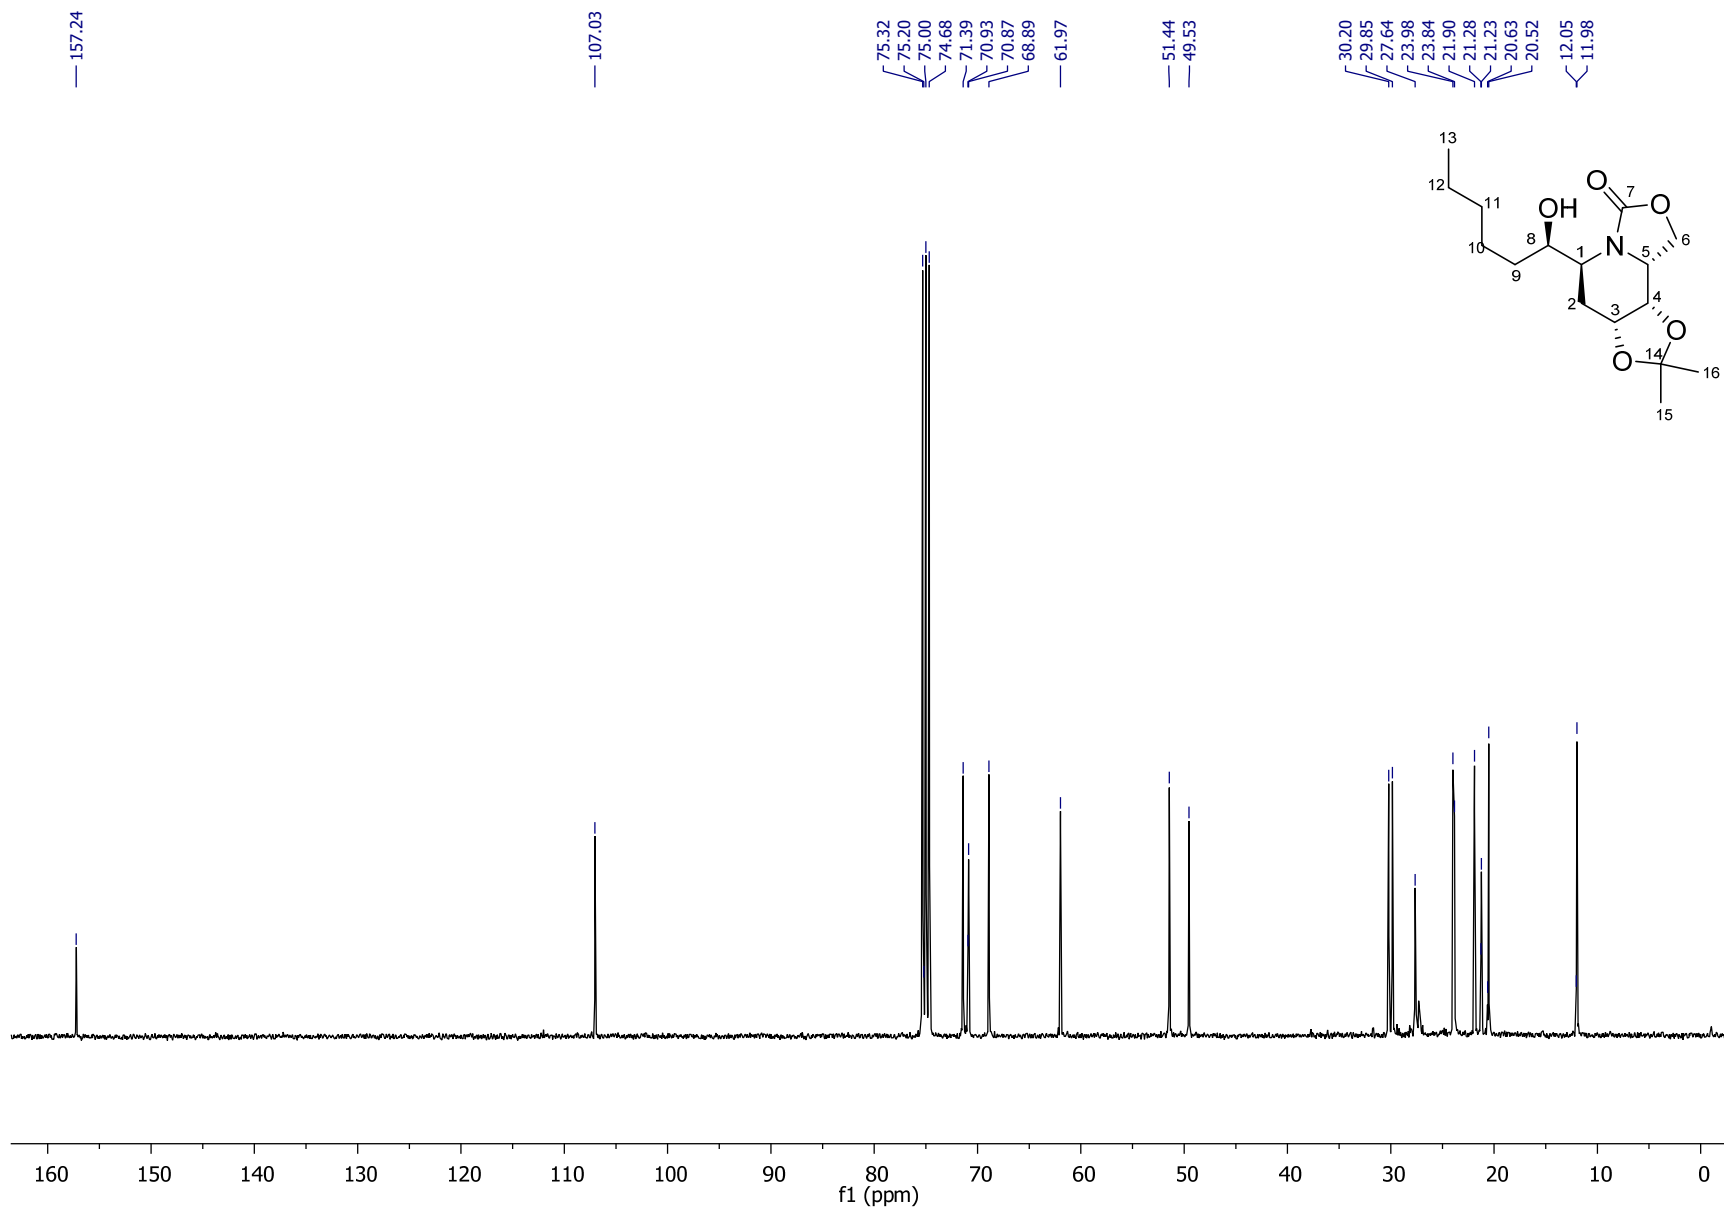



$^1\text{H}$  NMR of compound **5-*exo*** (400 MHz,  $\text{CDCl}_3$ , 300K)

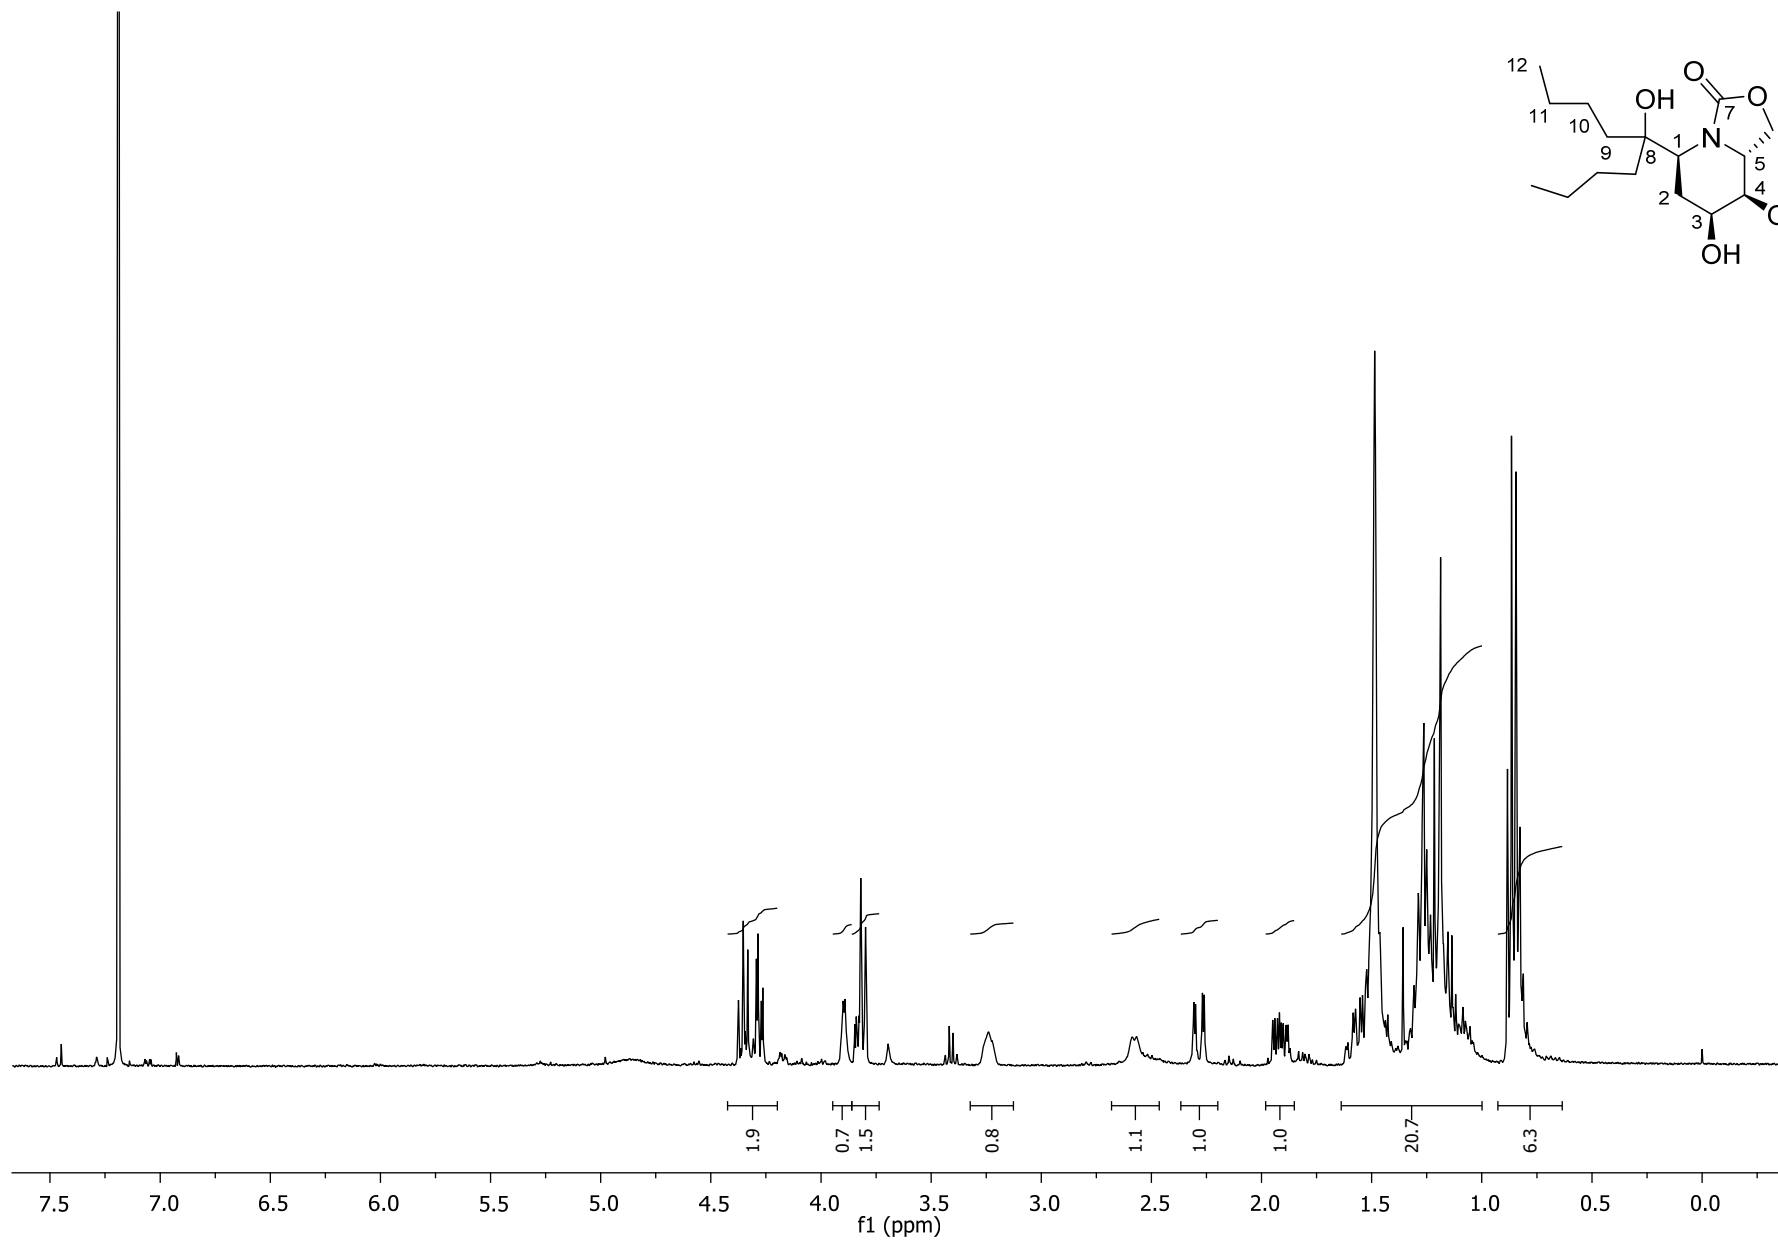

$^{13}\text{C}$  NMR of compound **5-*exo*** (100 MHz,  $\text{CDCl}_3$ , 300K)

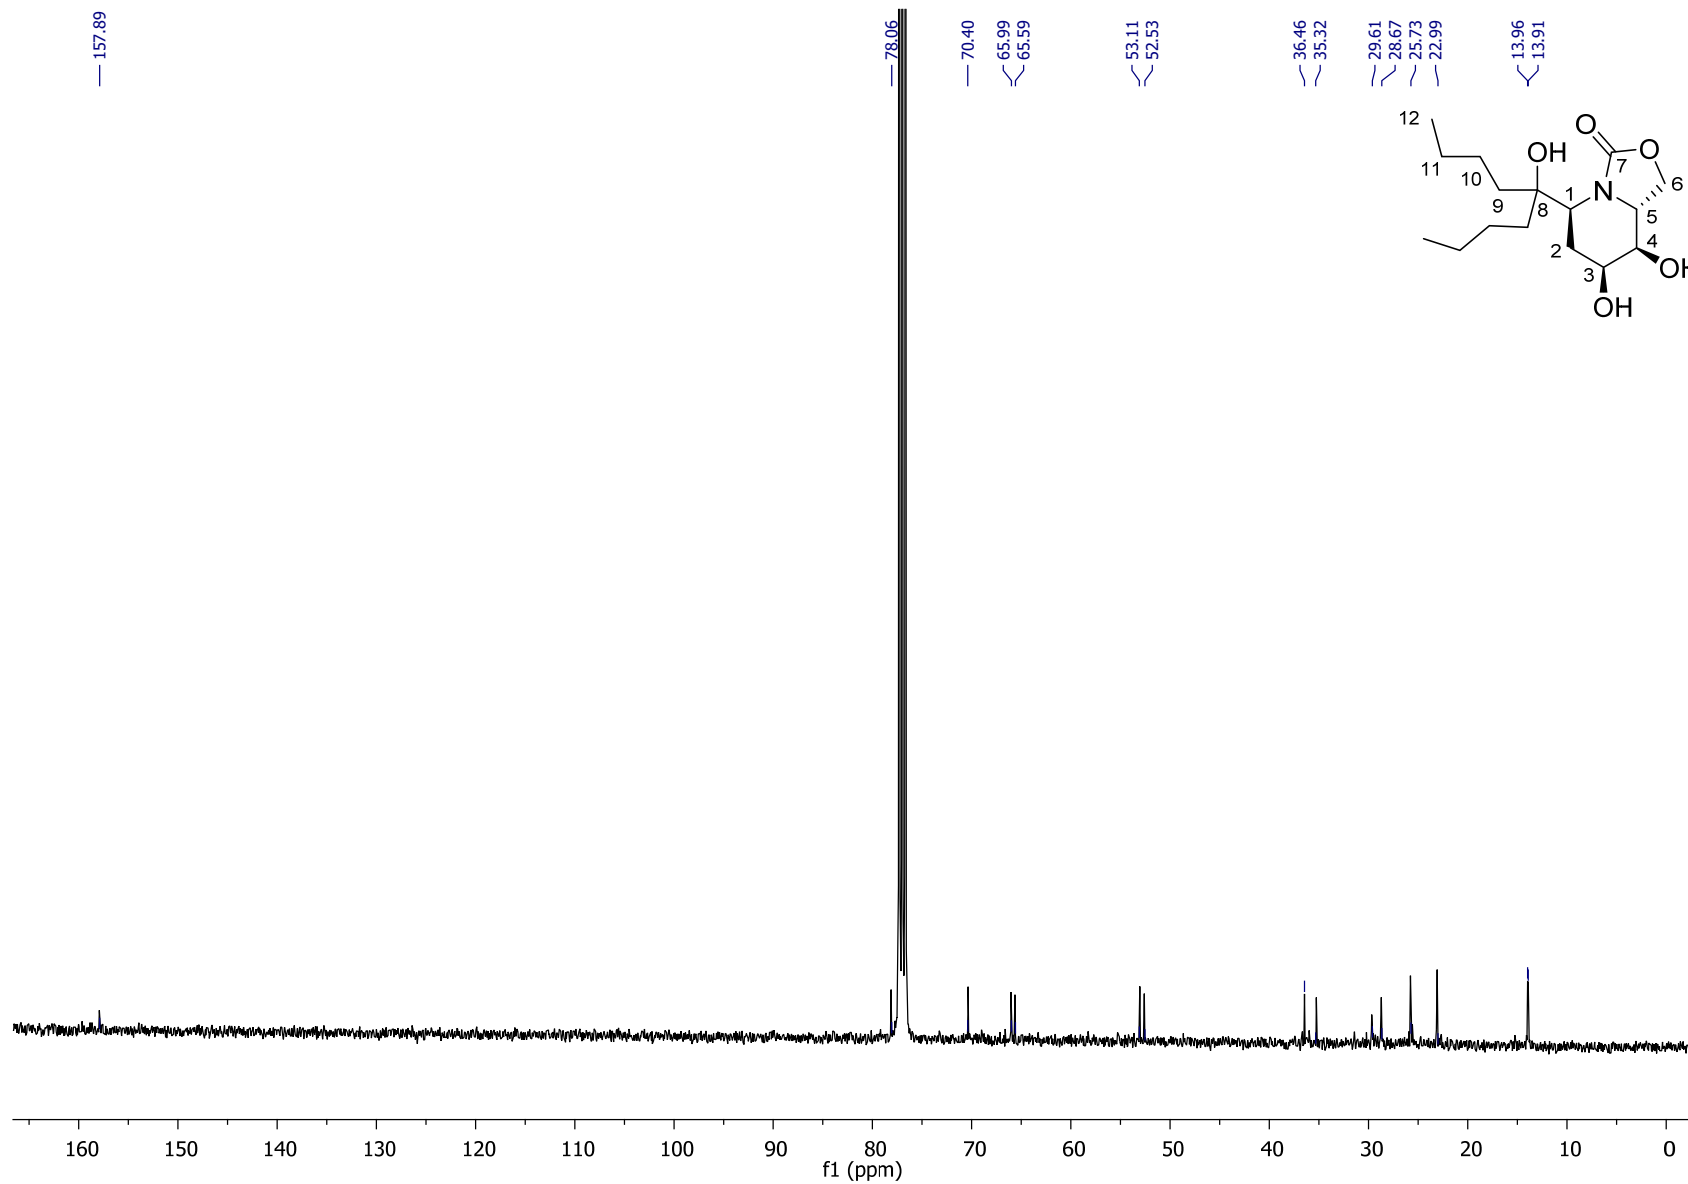

$^1\text{H}$  NMR of compound **5-endo** (400 MHz,  $\text{CDCl}_3$ , 300K)

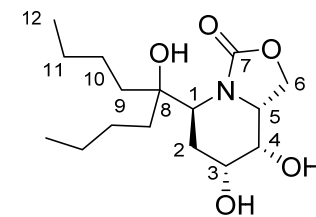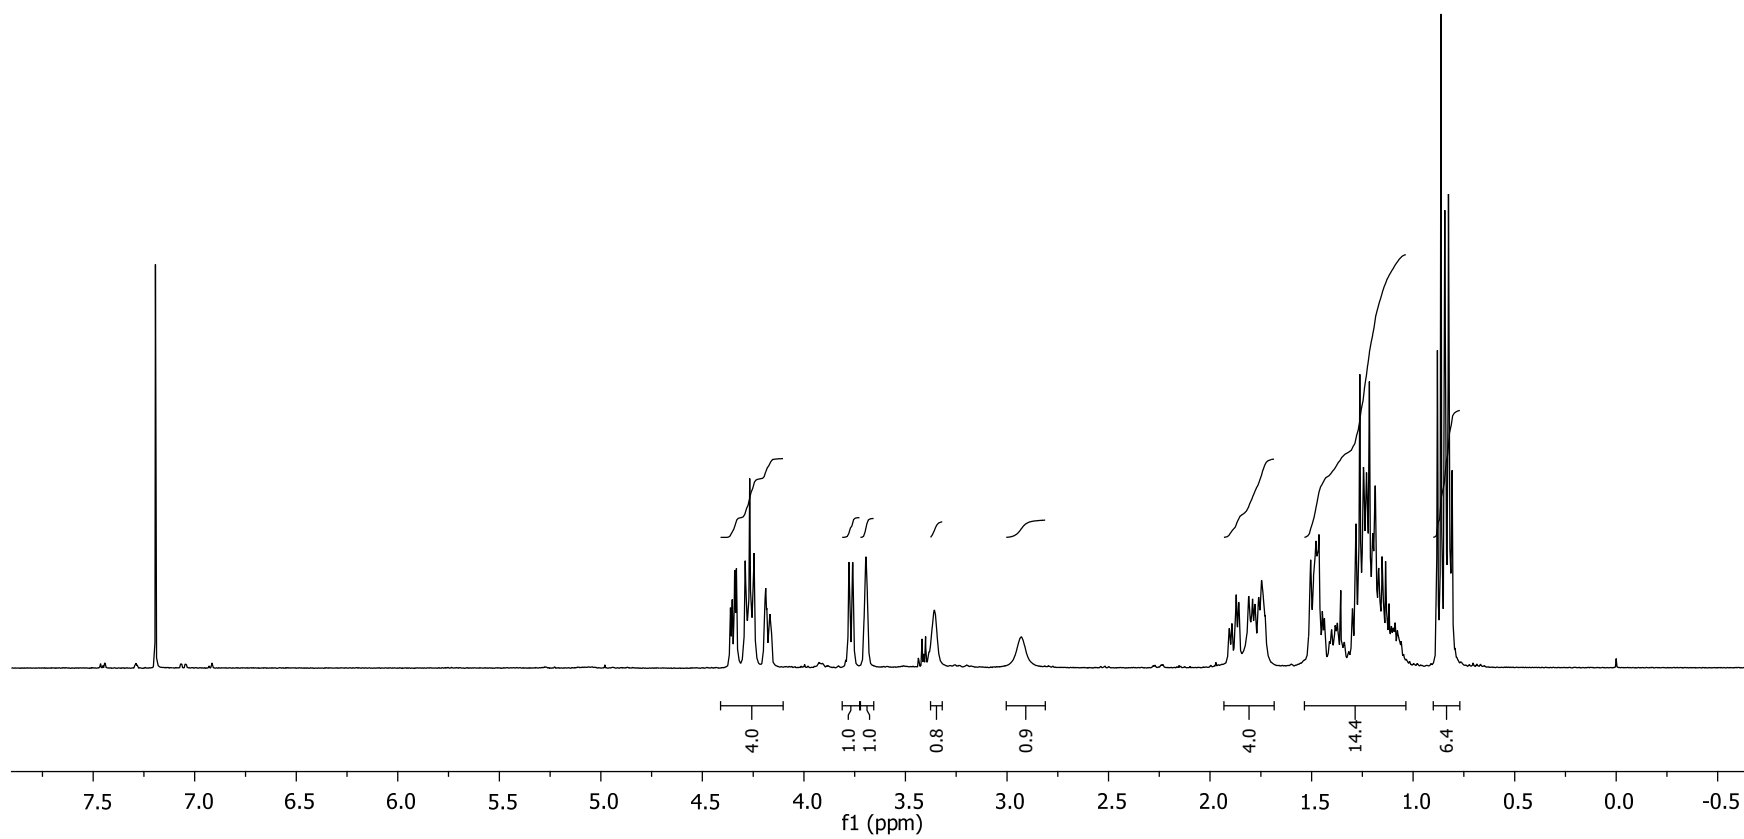

$^{13}\text{C}$  NMR of compound **5-endo** (100 MHz,  $\text{CDCl}_3$ , 300K)

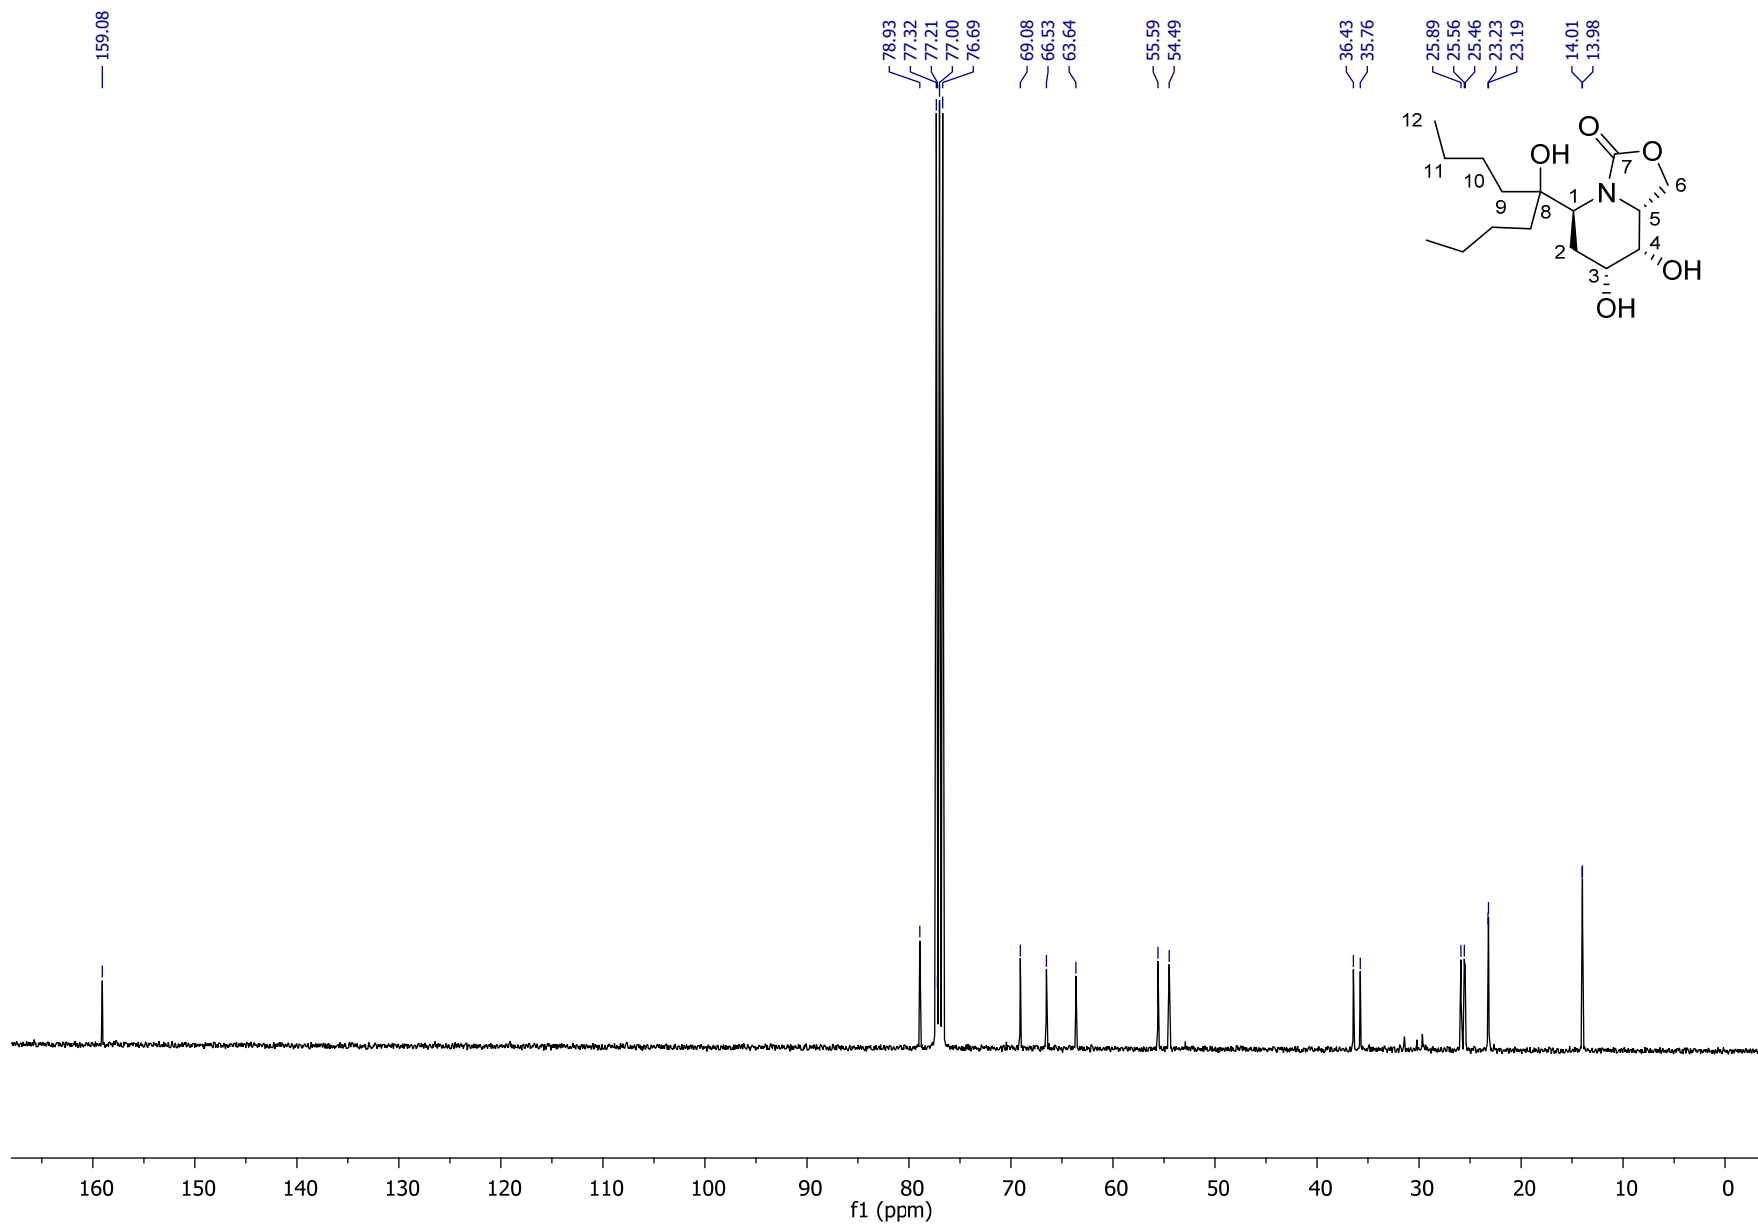

$^1\text{H}$  NMR of compound **6-exo** (300 MHz,  $\text{CDCl}_3$ , 300K)

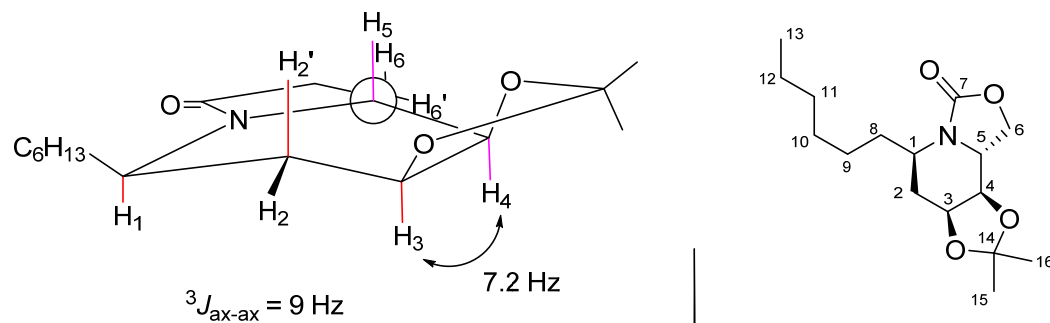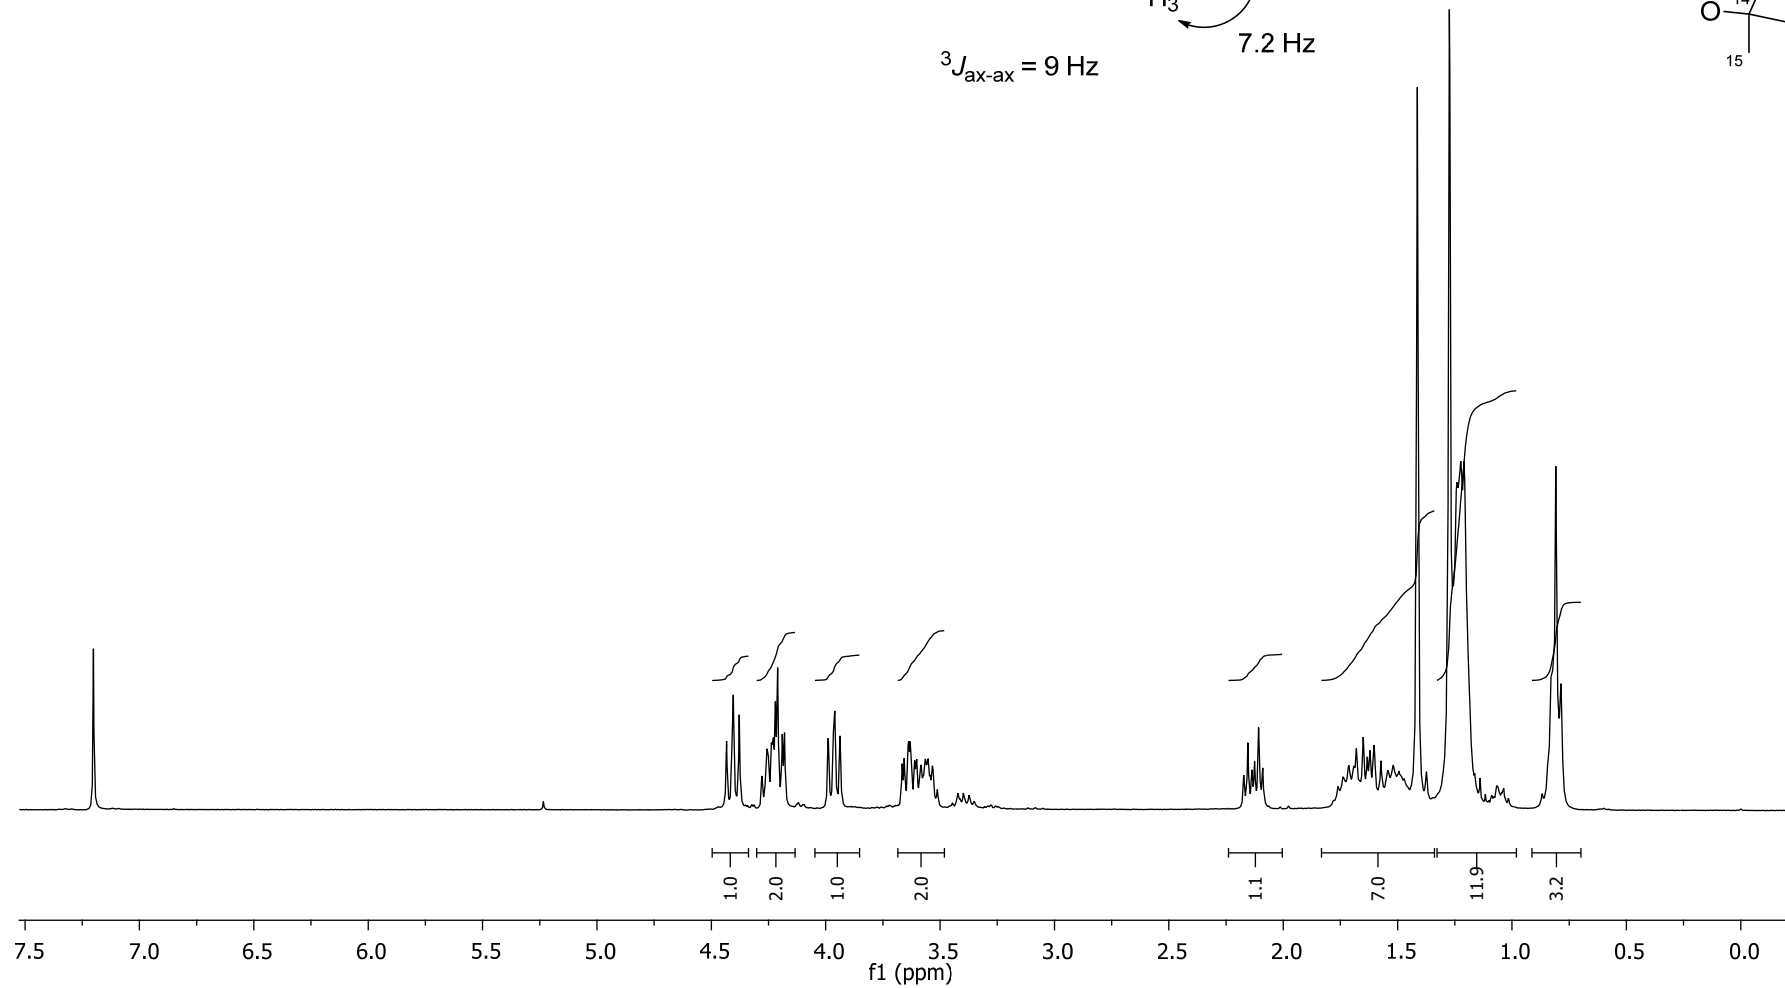

$^{13}\text{C}$  NMR of compound **6-*exo*** (75 MHz,  $\text{CDCl}_3$ , 300K)

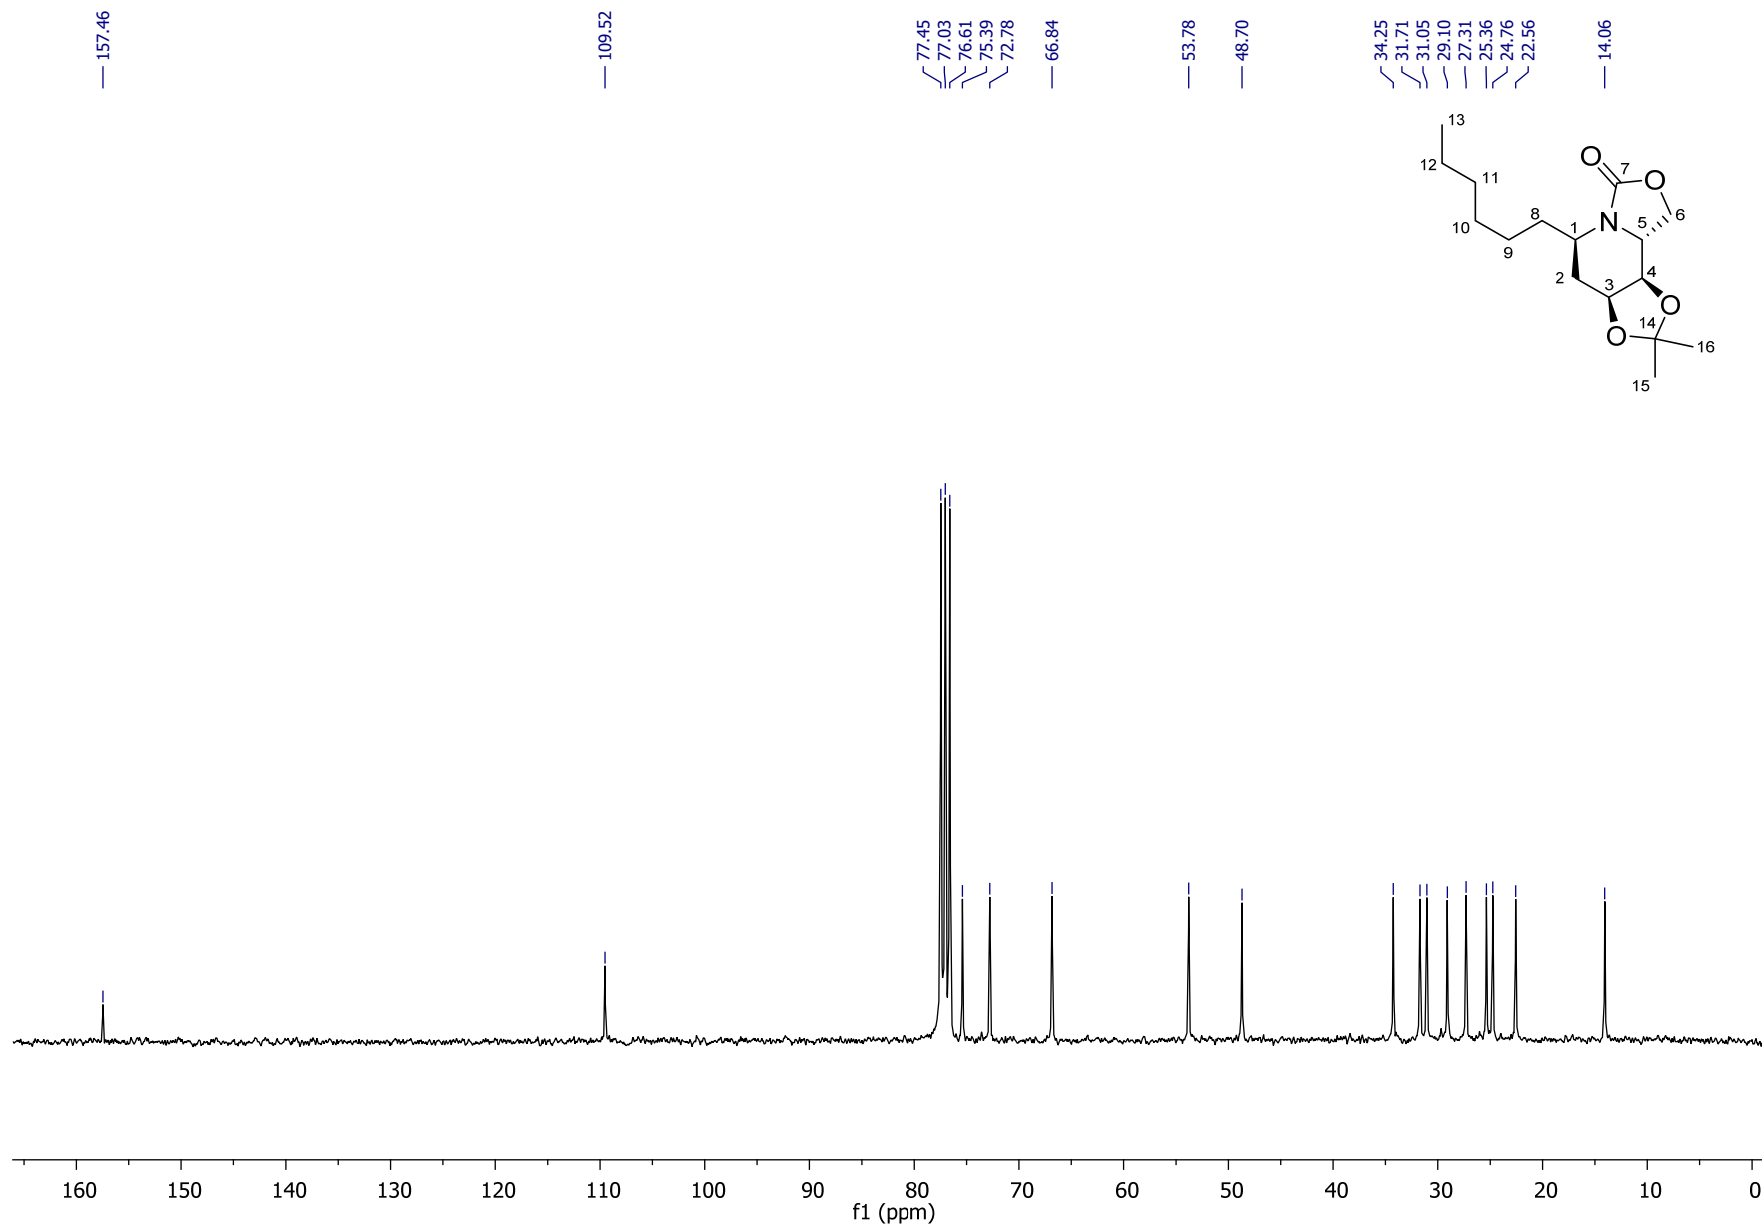

$^1\text{H}$  NMR of compound **6-endo** (300 MHz,  $\text{CDCl}_3$ , 300K)

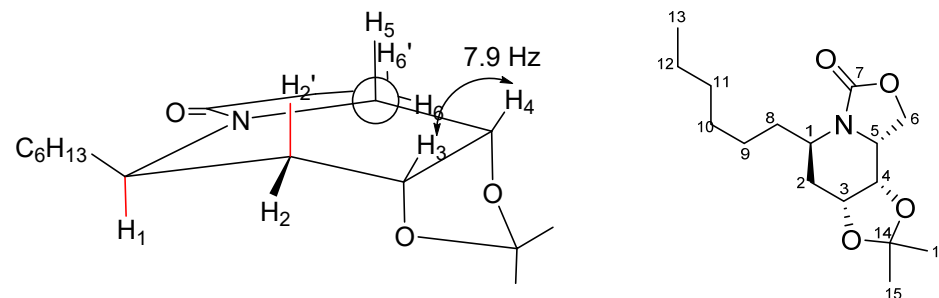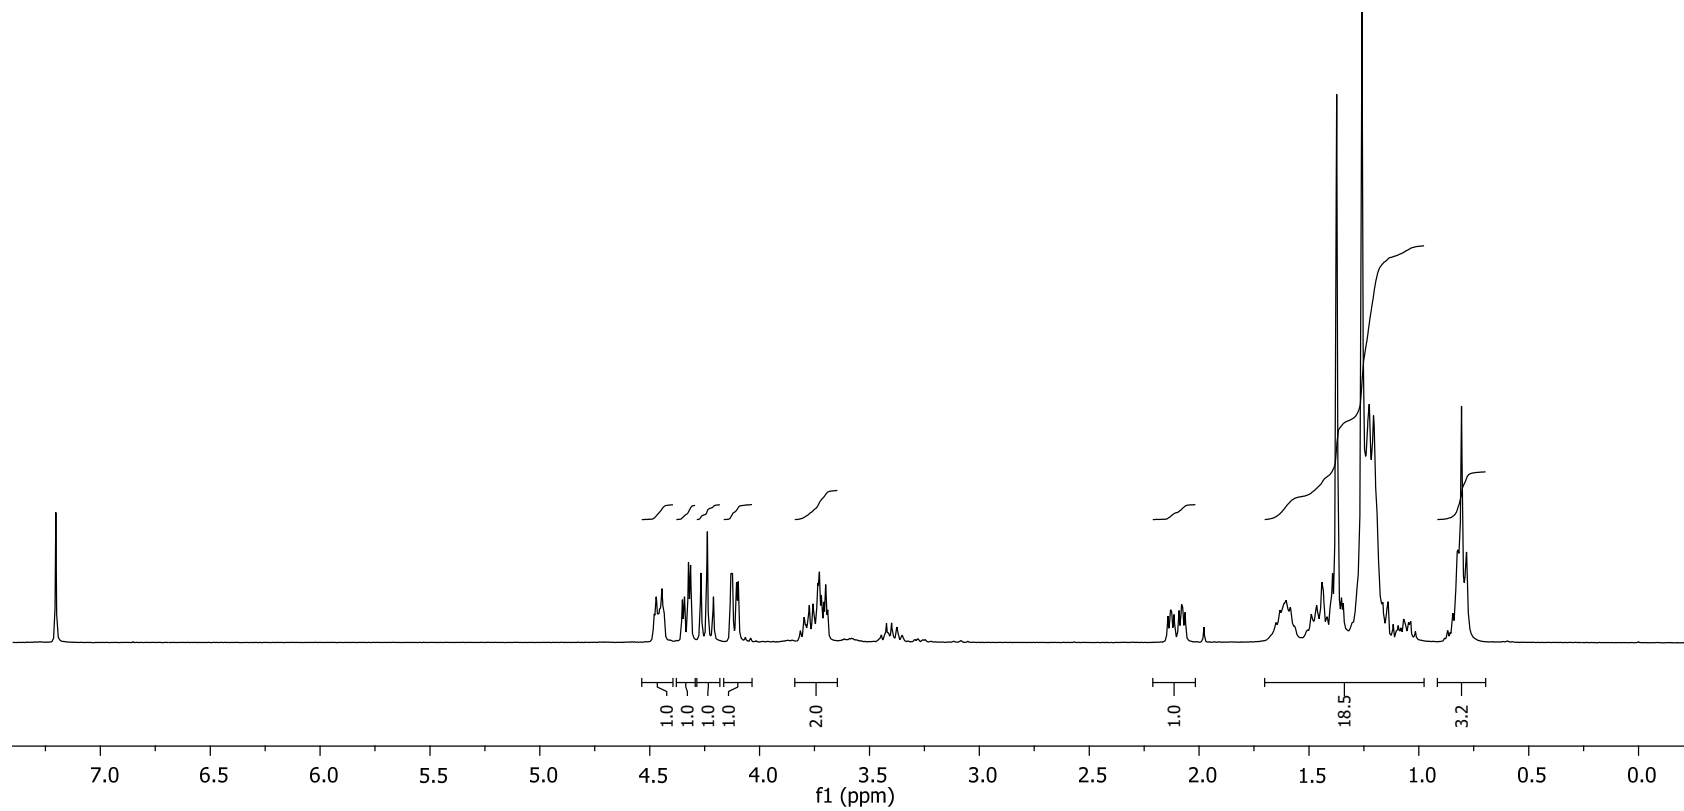

$^{13}\text{C}$  NMR of compound **6-endo** (75 MHz,  $\text{CDCl}_3$ , 300K)

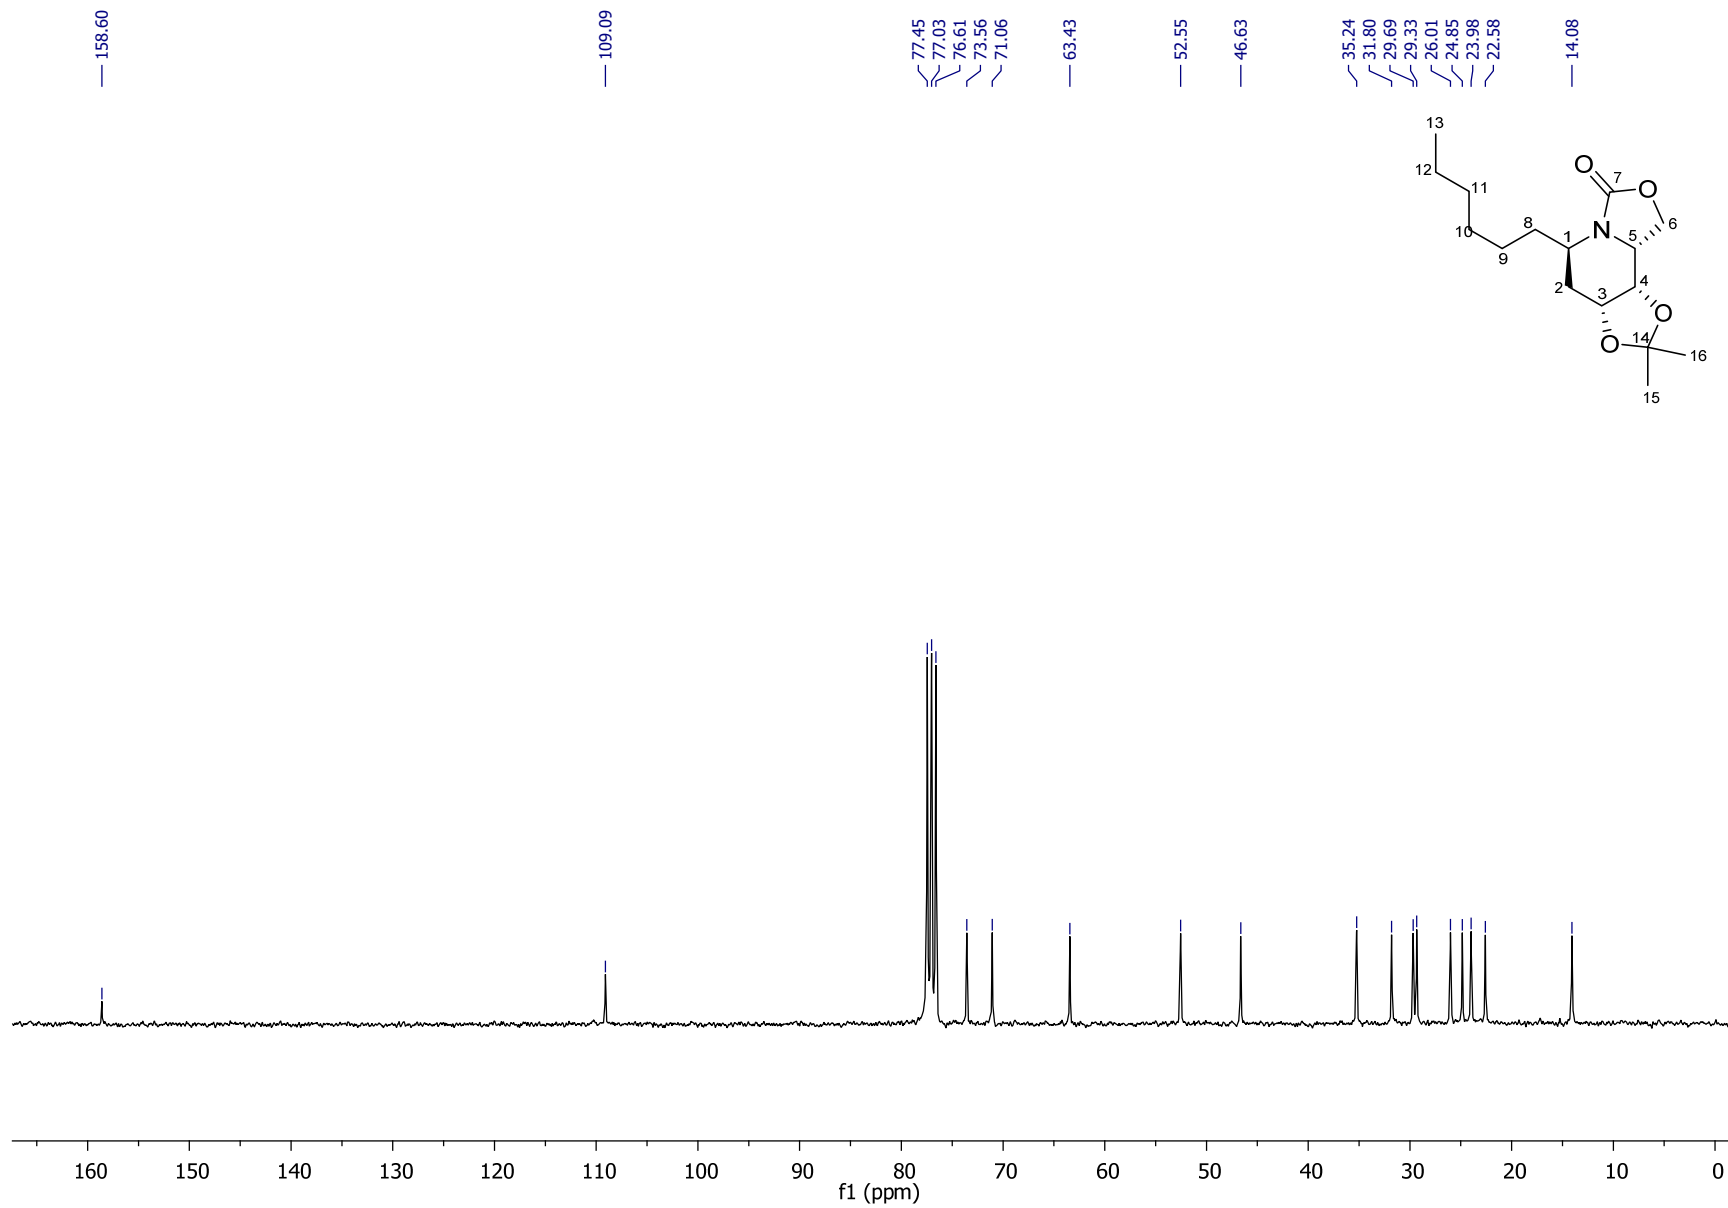



$^1\text{H}$  NMR of compound **9** (400 MHz,  $\text{CDCl}_3$ , 300K)

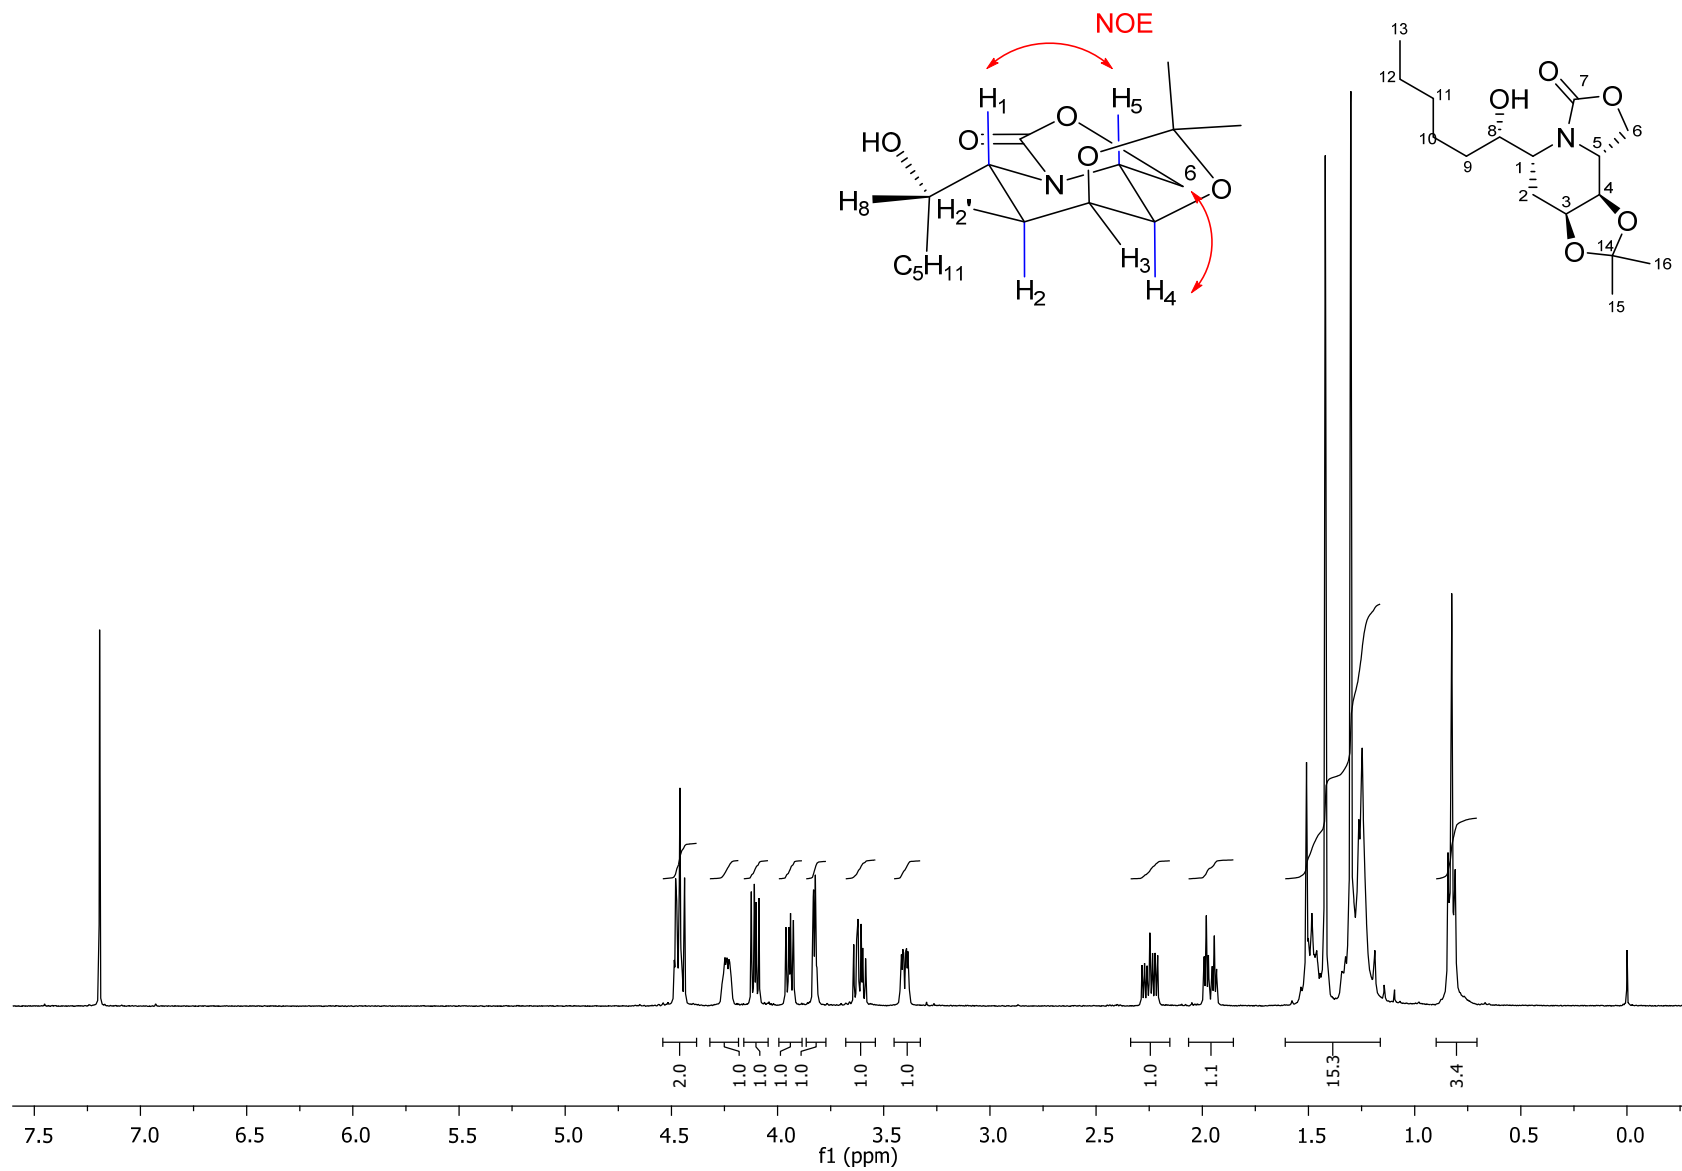

$^{13}\text{C}$  NMR of compound **9** (100 MHz,  $\text{CDCl}_3$ , 300K)

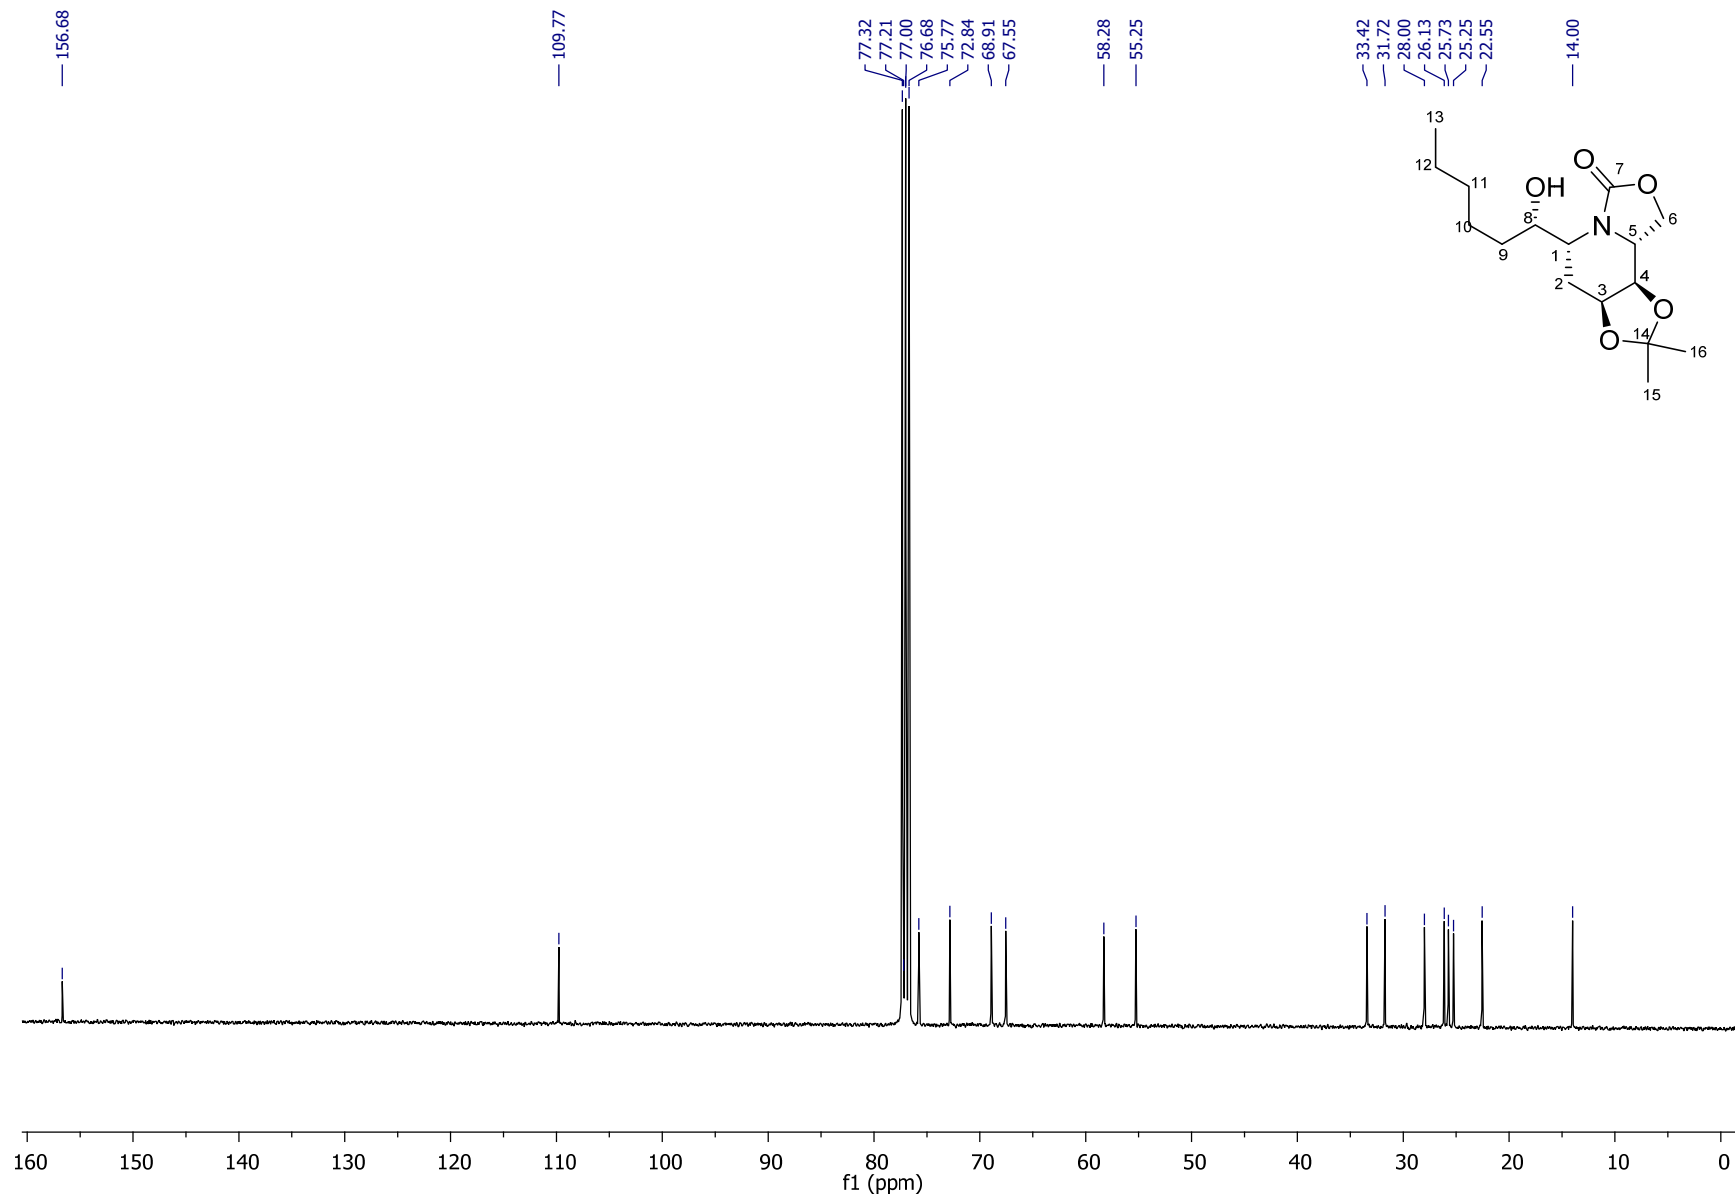

$^1\text{H}$  NMR of compound **10** (400 MHz,  $\text{CDCl}_3$ , 300K)

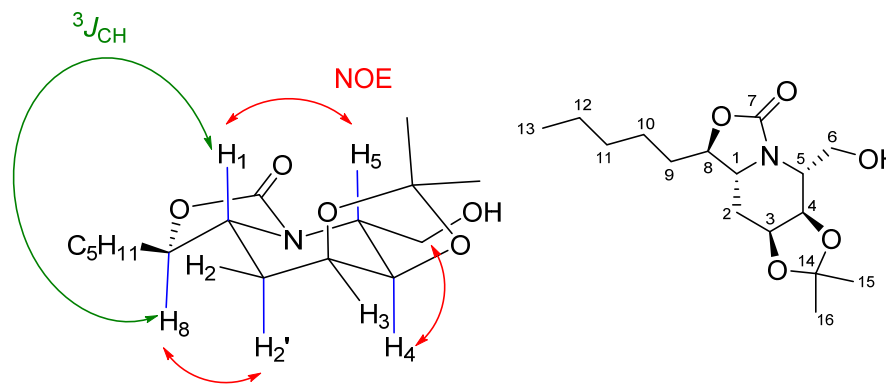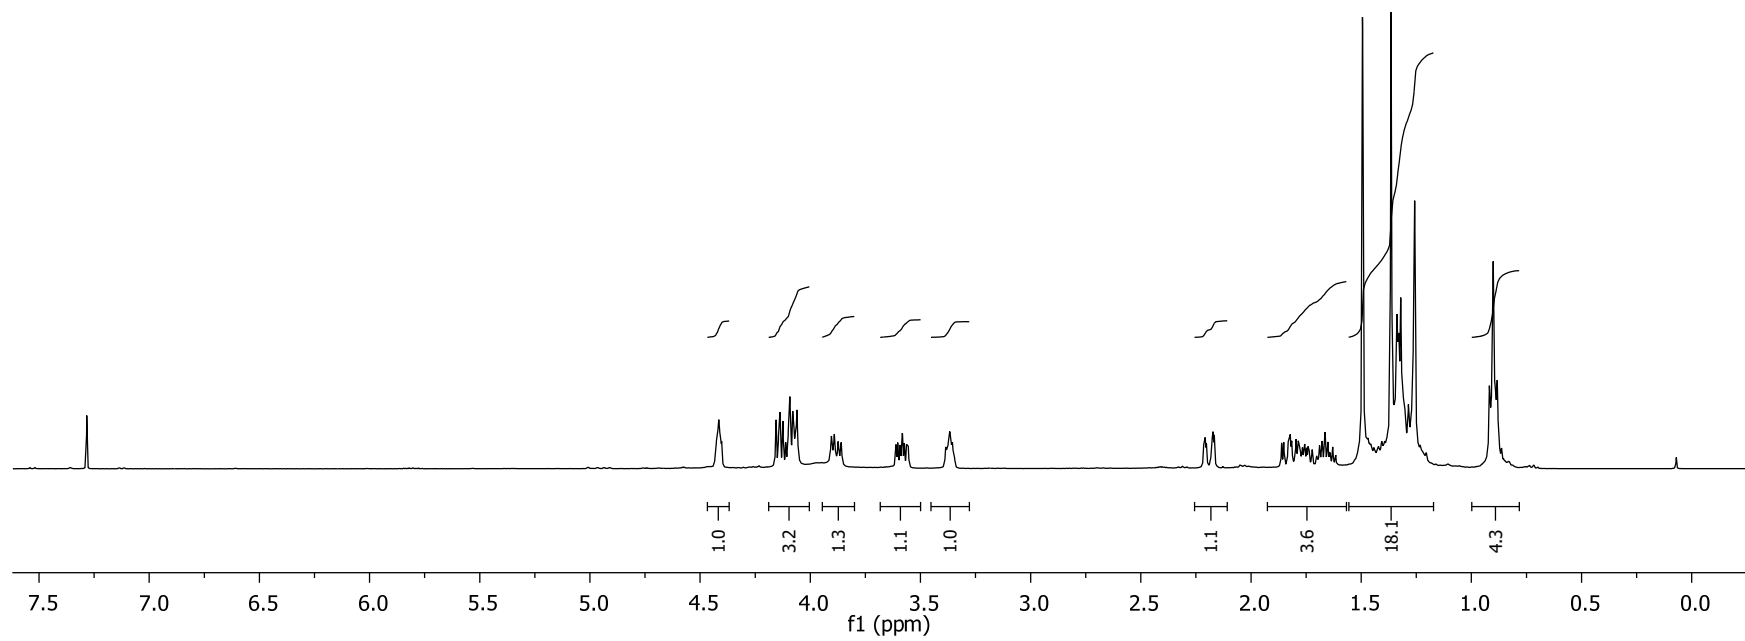

$^{13}\text{C}$  NMR spectrum of compound **10** (100 MHz,  $\text{CDCl}_3$ , 300K)

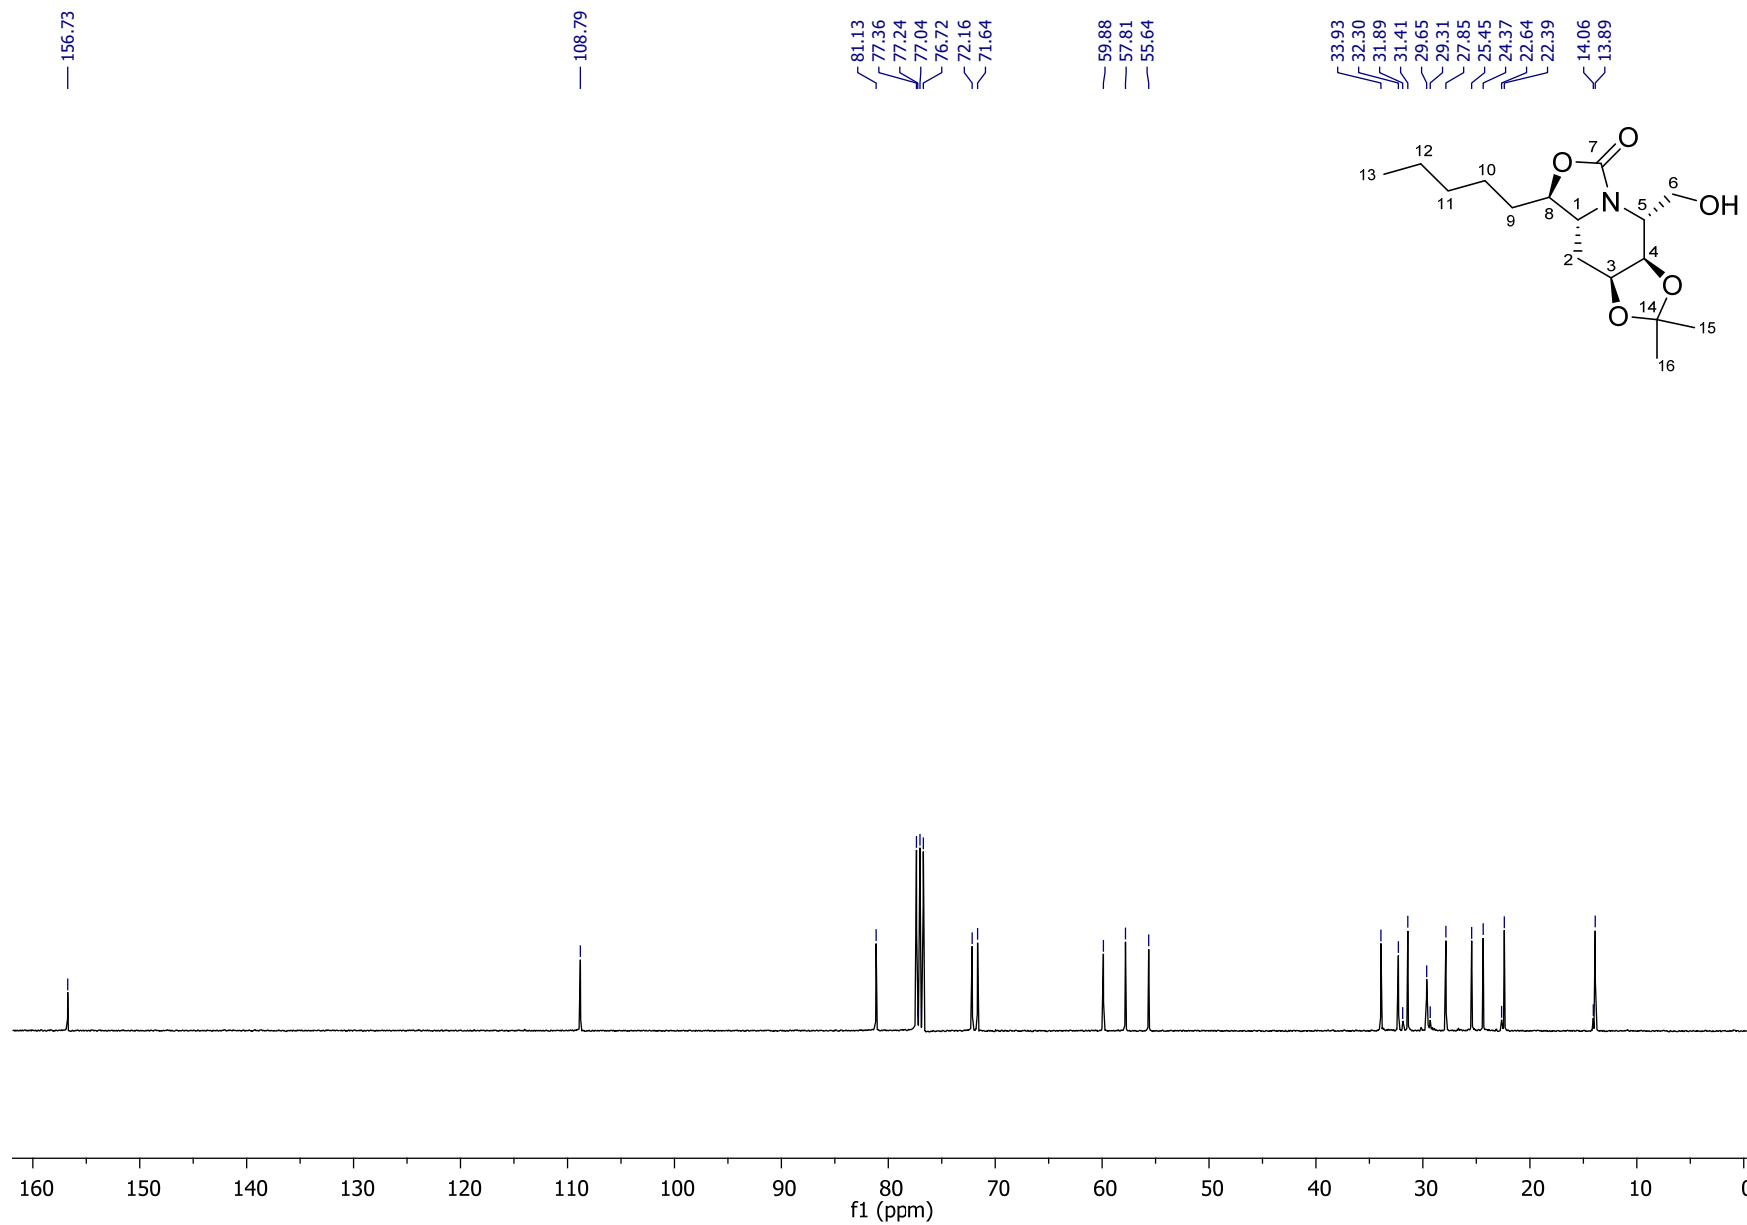

$^1\text{H}$  NMR of compound **11** (400 MHz,  $\text{CDCl}_3$ , 300K)

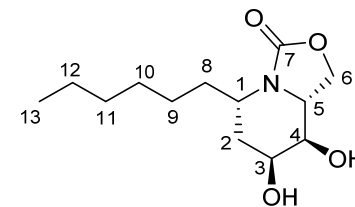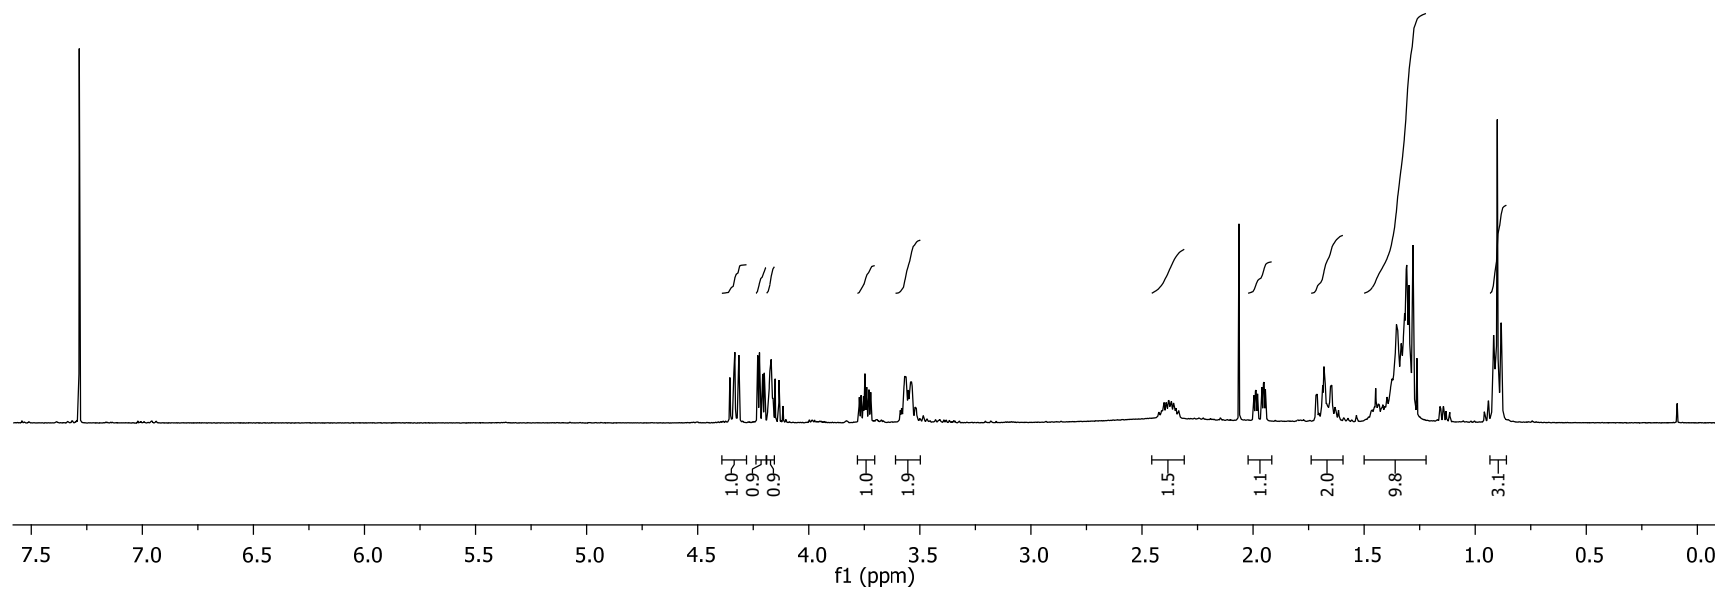

$^{13}\text{C}$  NMR compound **11** (100 MHz,  $\text{CDCl}_3$ , 300K)

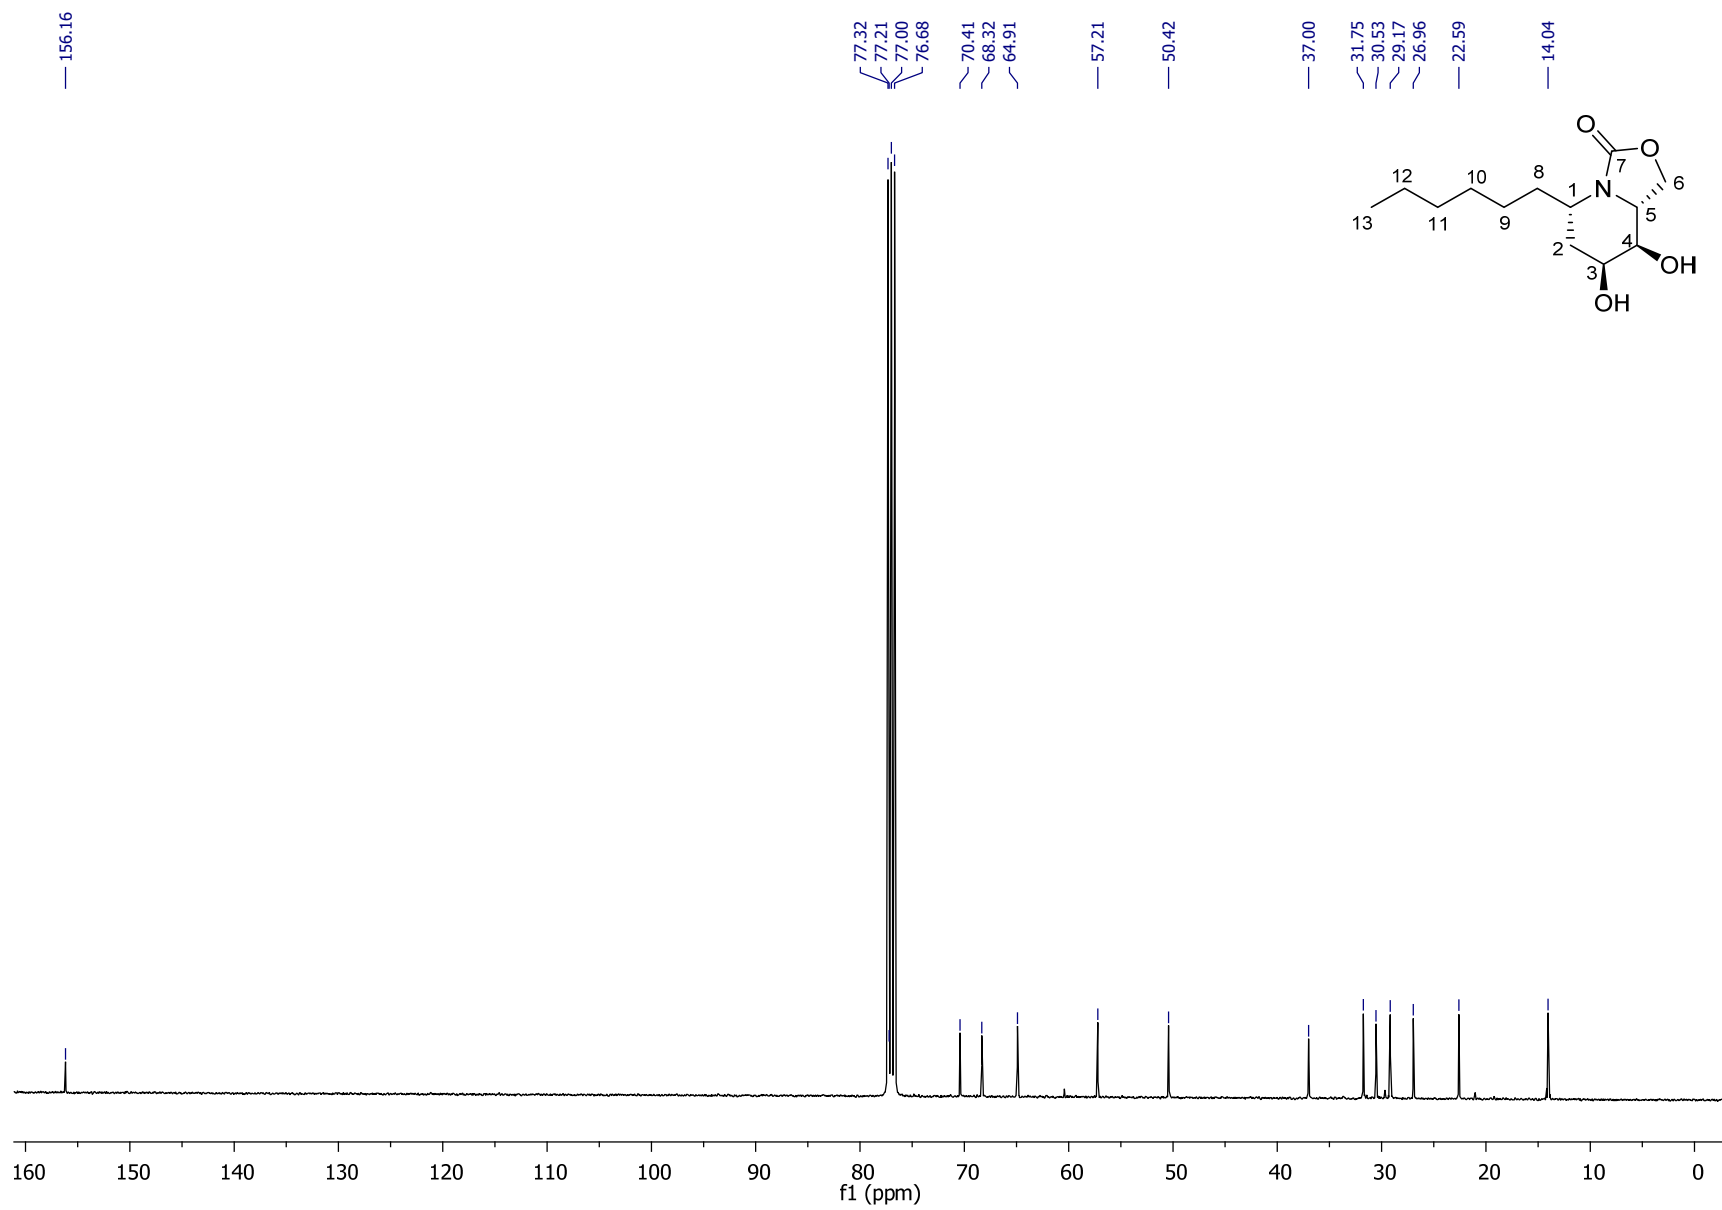

$^1\text{H}$  NMR of compound **12** (300 MHz,  $\text{CDCl}_3$ , 300K)

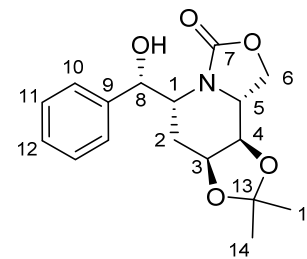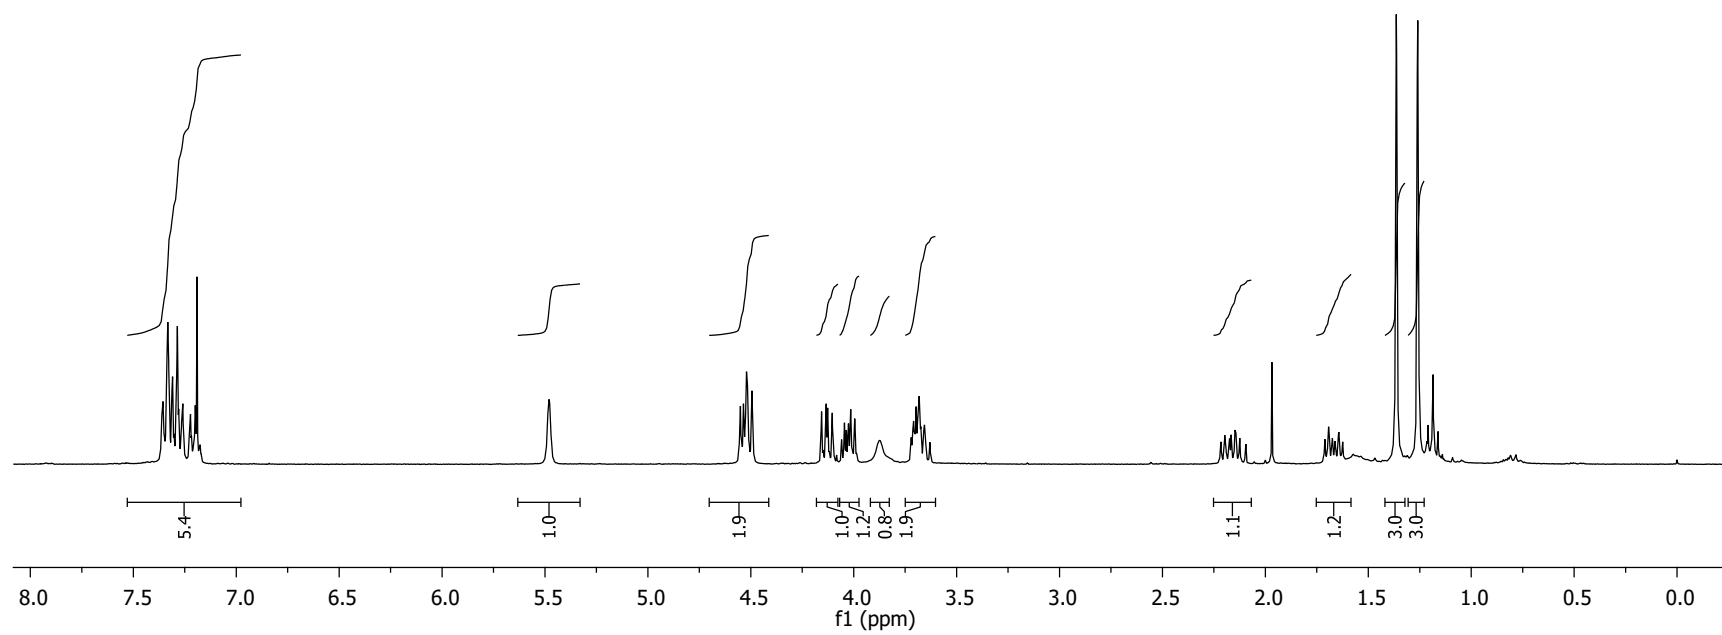

$^{13}\text{C}$  NMR of compound **12** (75 MHz,  $\text{CDCl}_3$ , 300K)

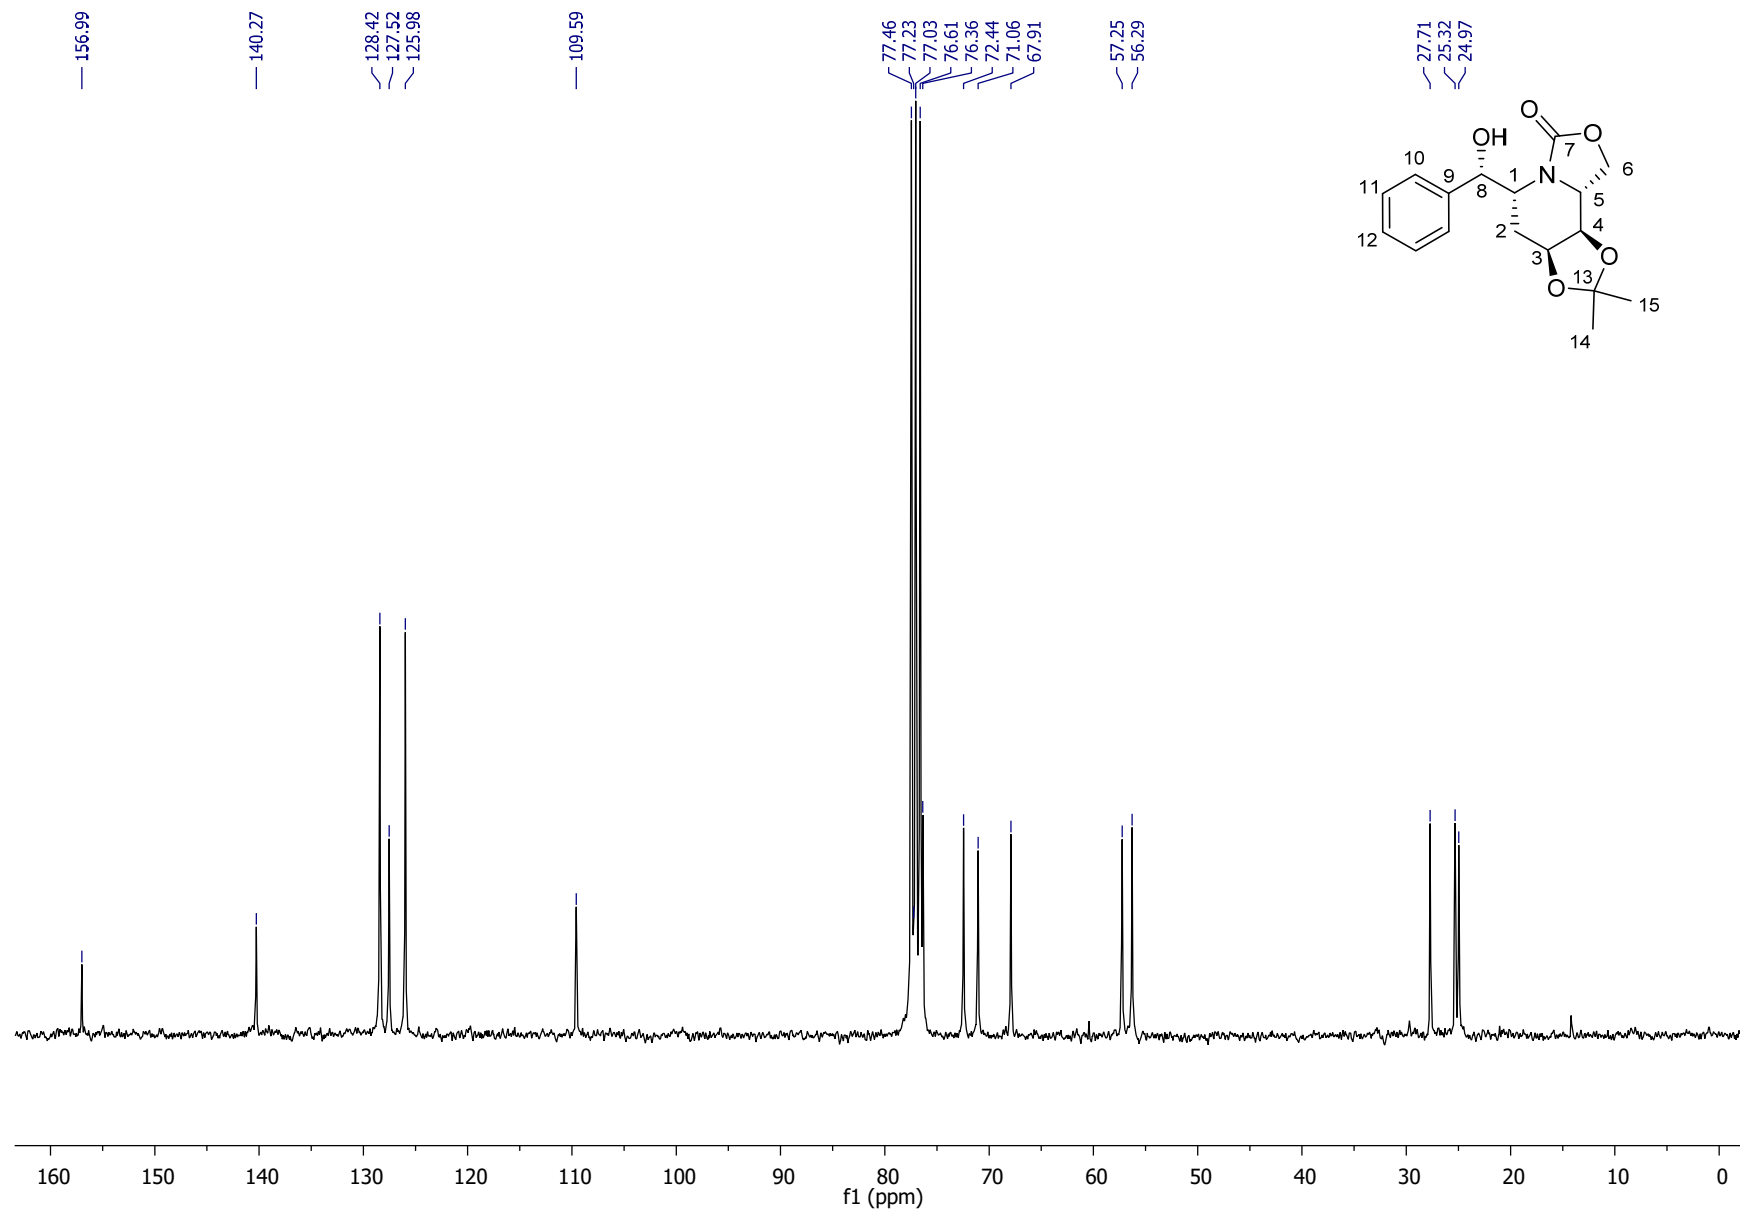



$^1\text{H}$  NMR of compound **13** in (300 MHz,  $\text{CDCl}_3$ , 300K)

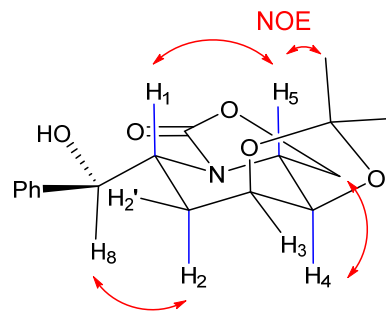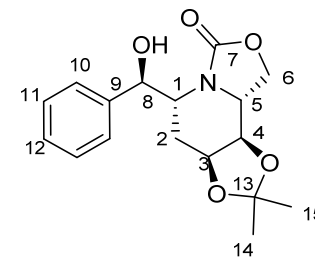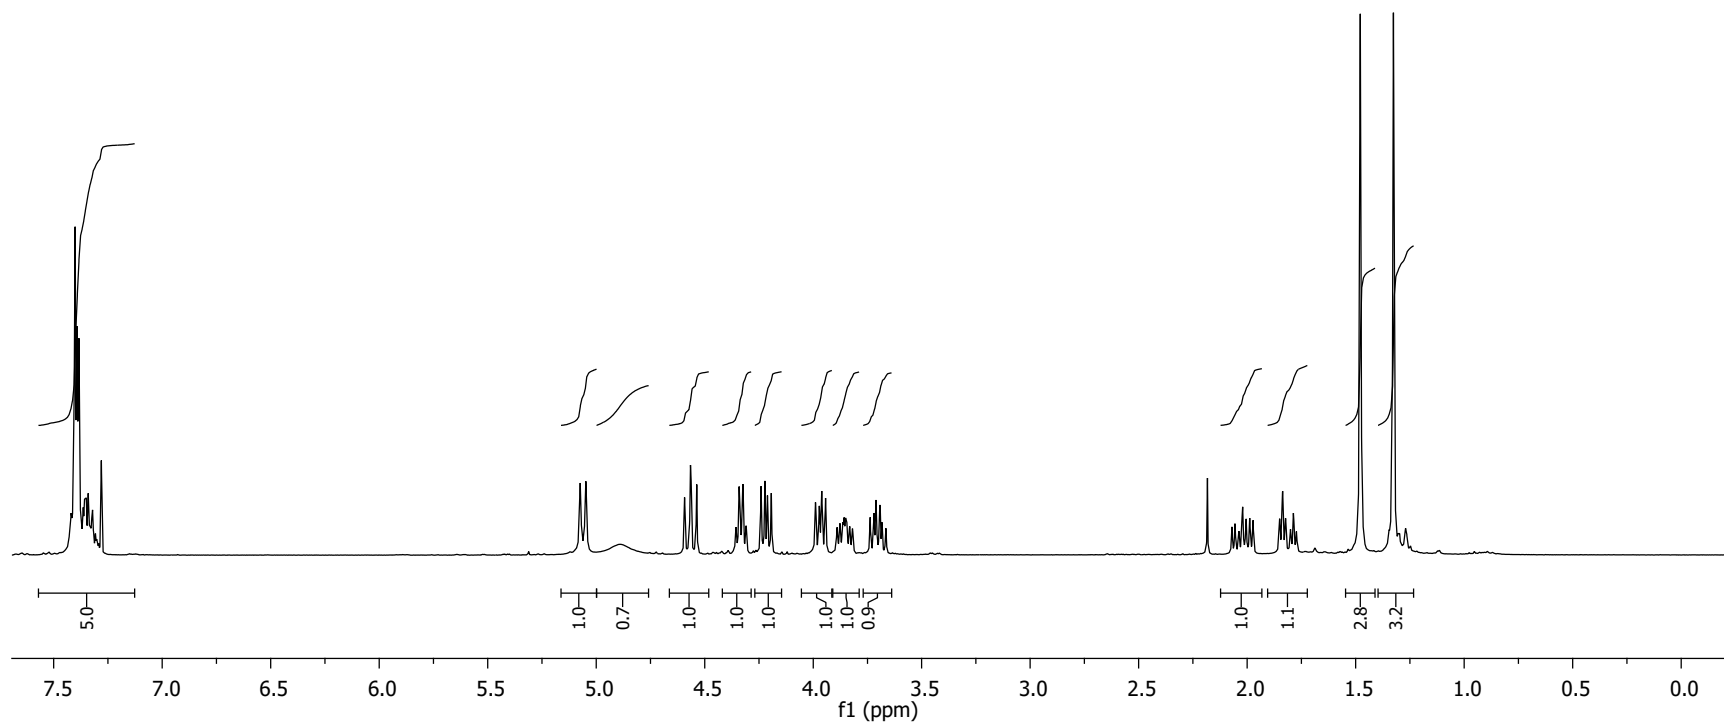

$^{13}\text{C}$  NMR of compound **13** (75 MHz,  $\text{CDCl}_3$ , 300K)

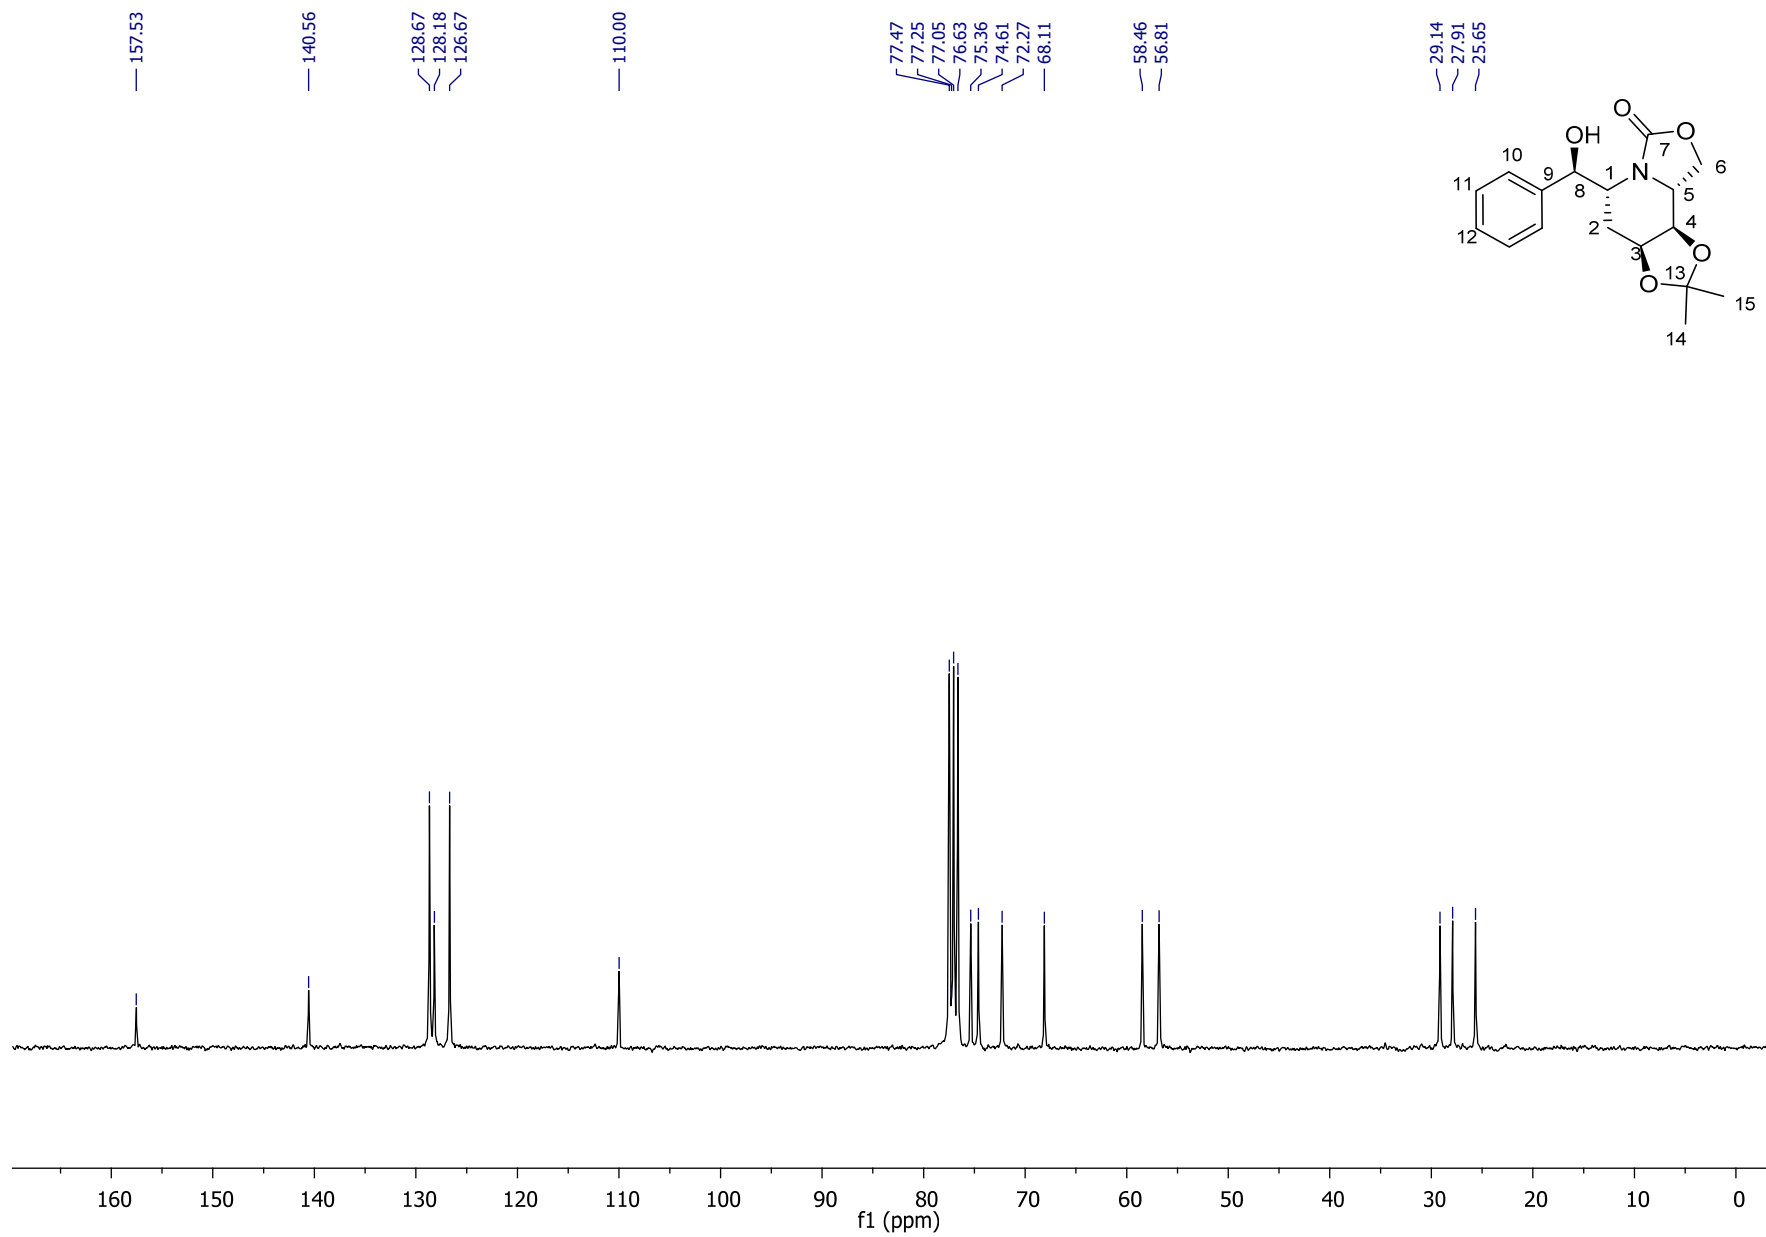

$^1\text{H}$  NMR of compound **14** (400 MHz,  $\text{CDCl}_3$ , 300K)

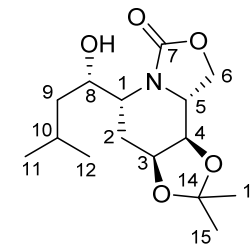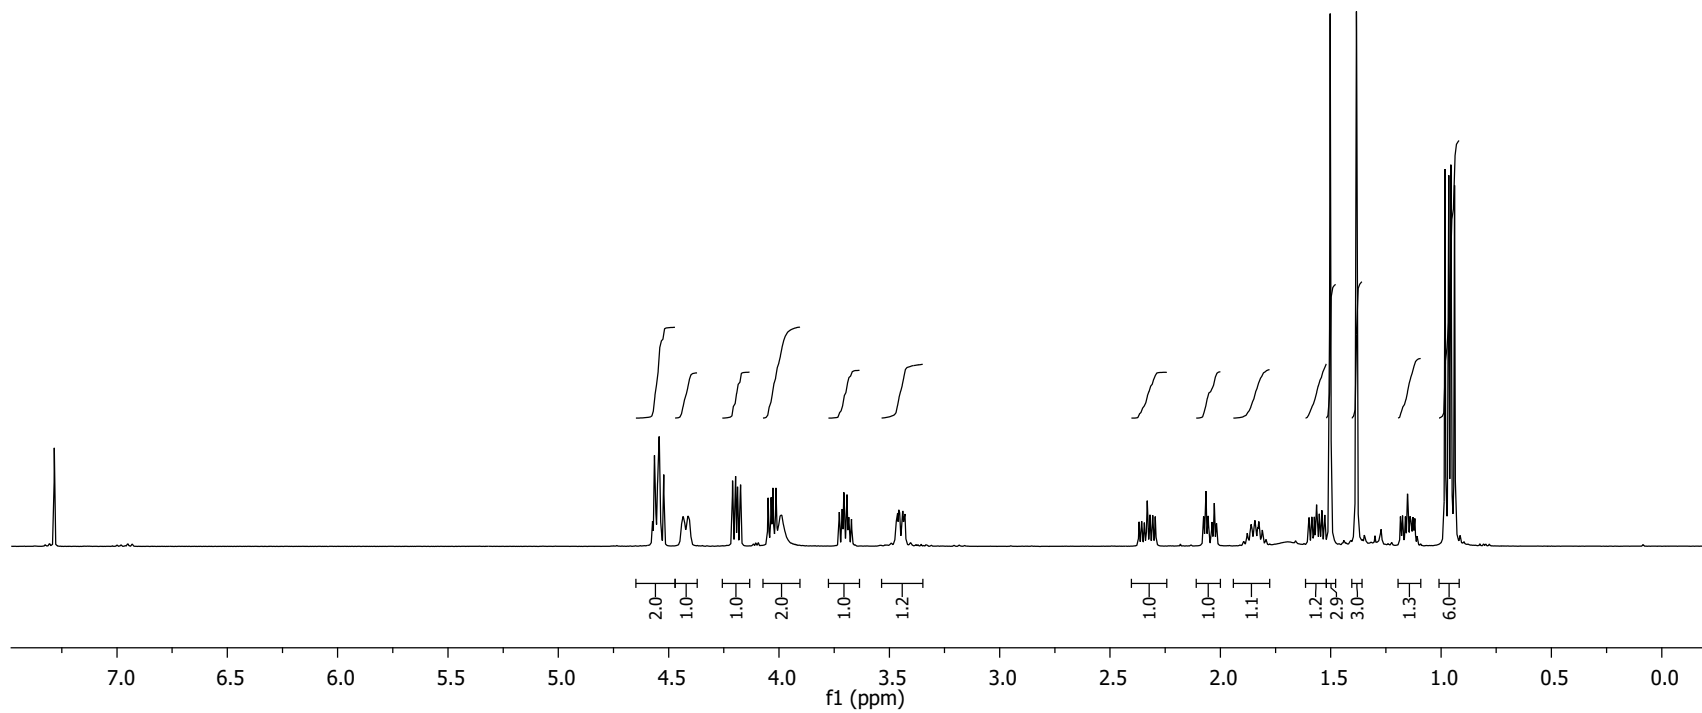

$^{13}\text{C}$  NMR of compound **14** (100 MHz,  $\text{CDCl}_3$ , 300K)

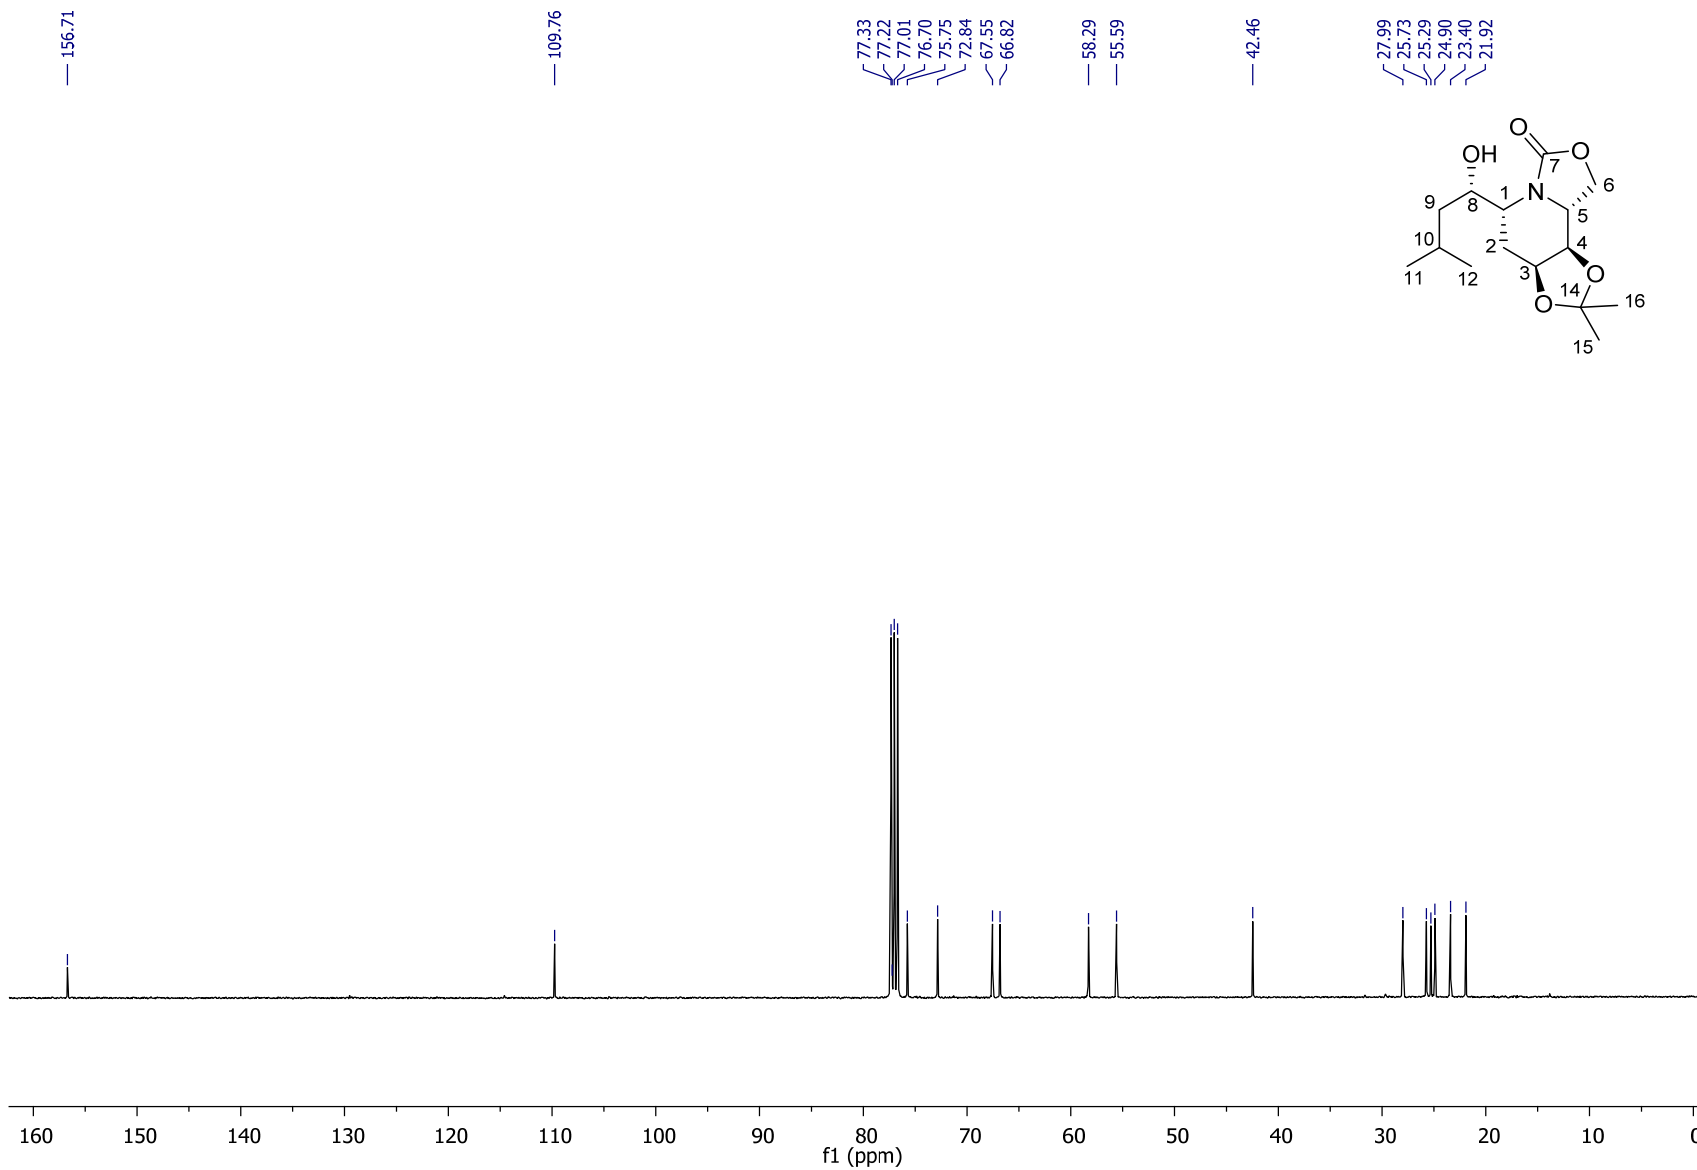

$^1\text{H}$  NMR of compound **15** (400 MHz,  $\text{CD}_3\text{OD}$ , 300K)

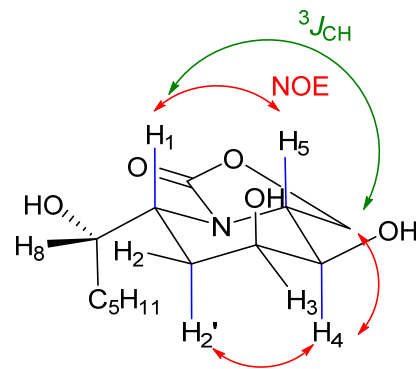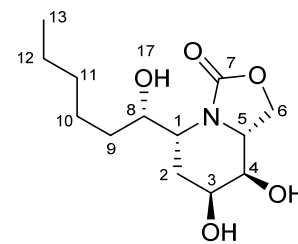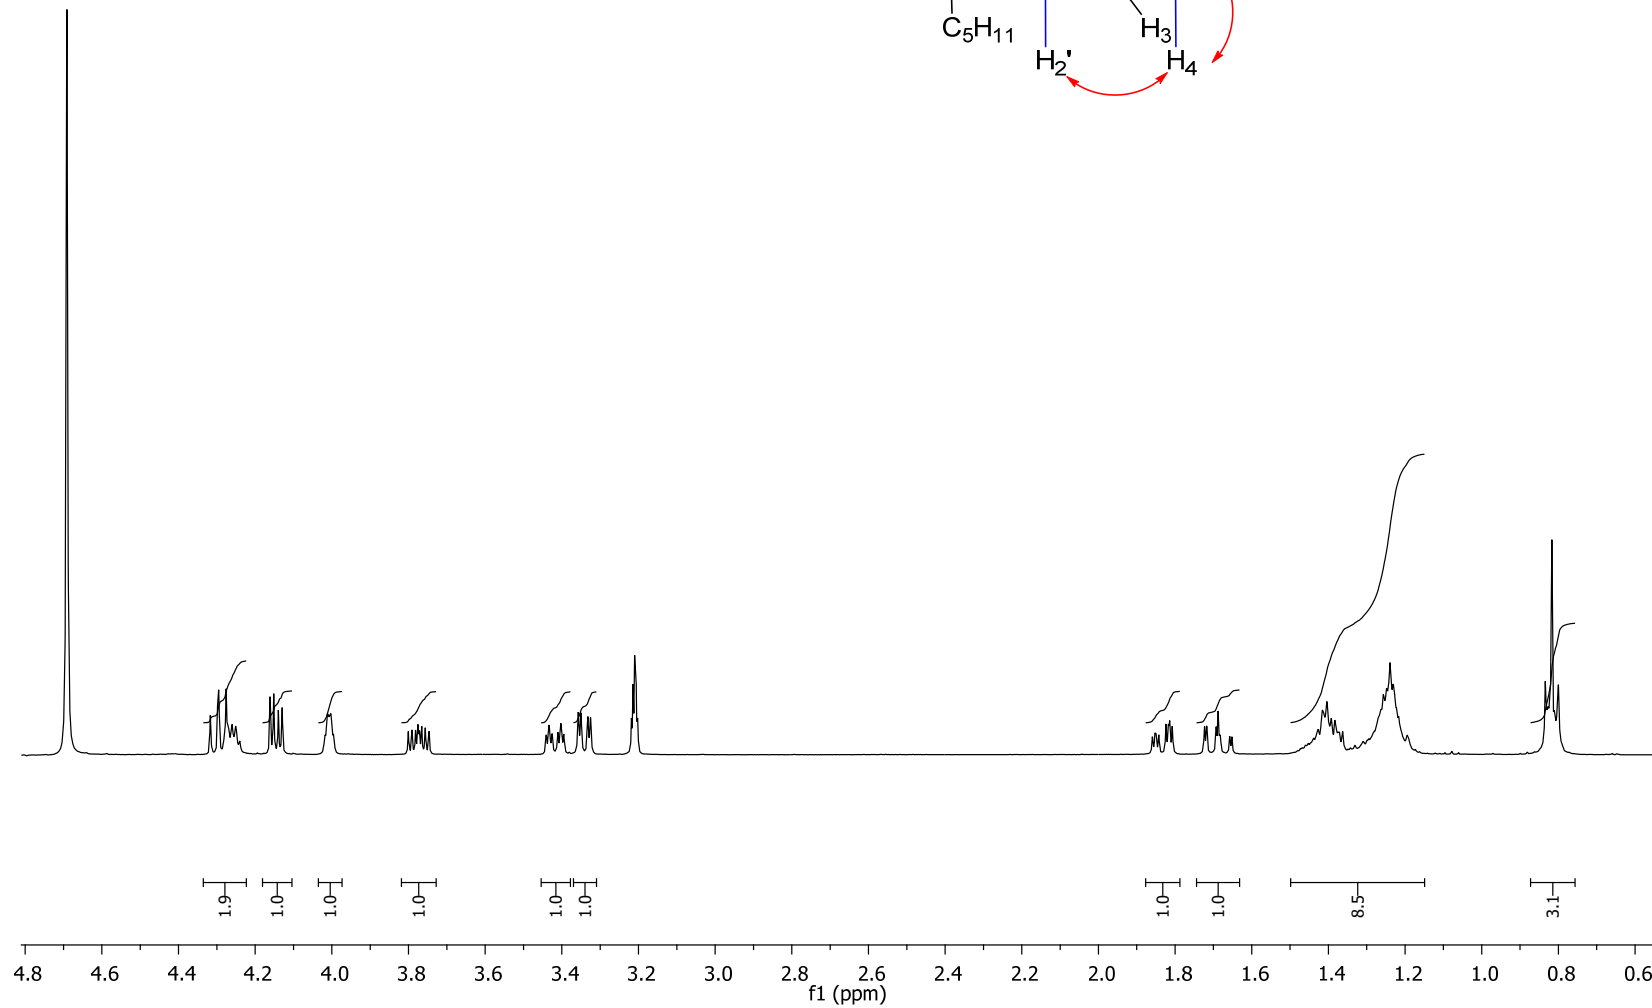

$^{13}\text{C}$  NMR of compound **15** (100 MHz,  $\text{CD}_3\text{OD}$ , 300K)

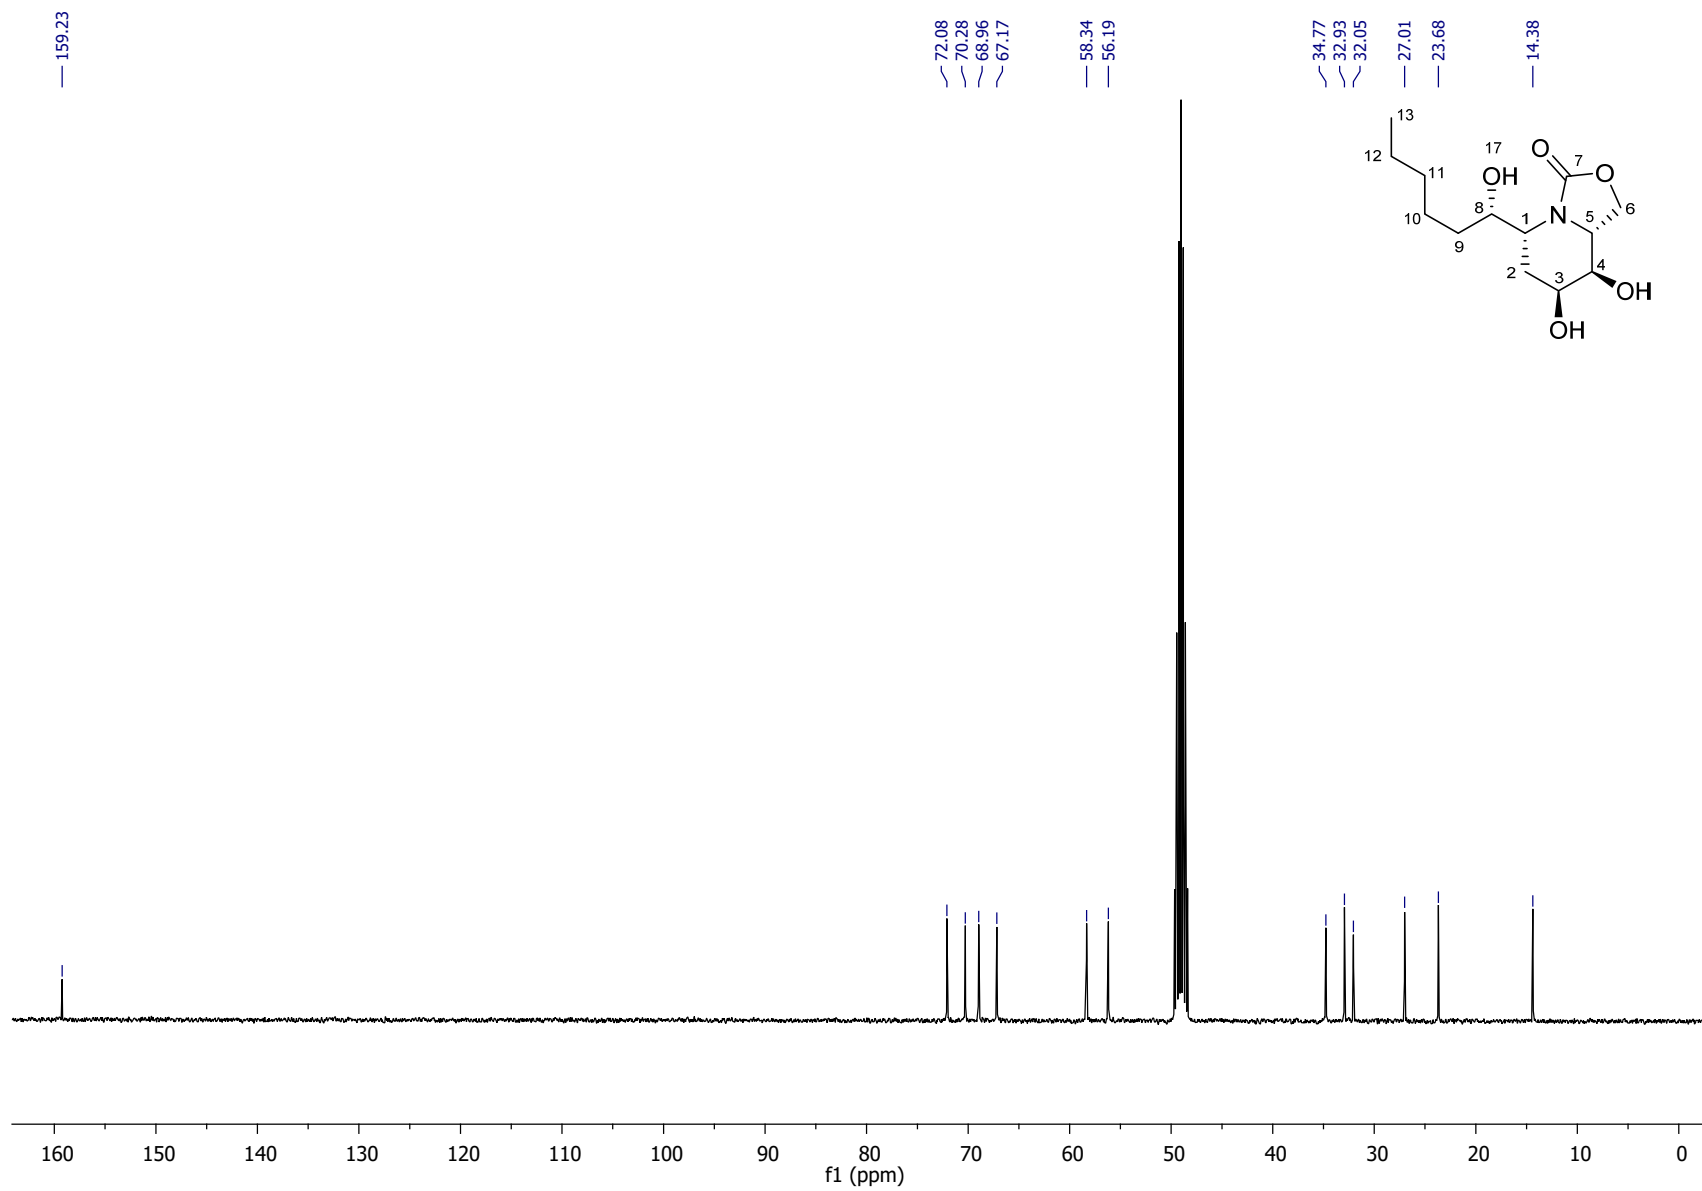

$^1\text{H}$  NMR of compound **16** (400 MHz,  $\text{CD}_3\text{OD}$ , 300K)

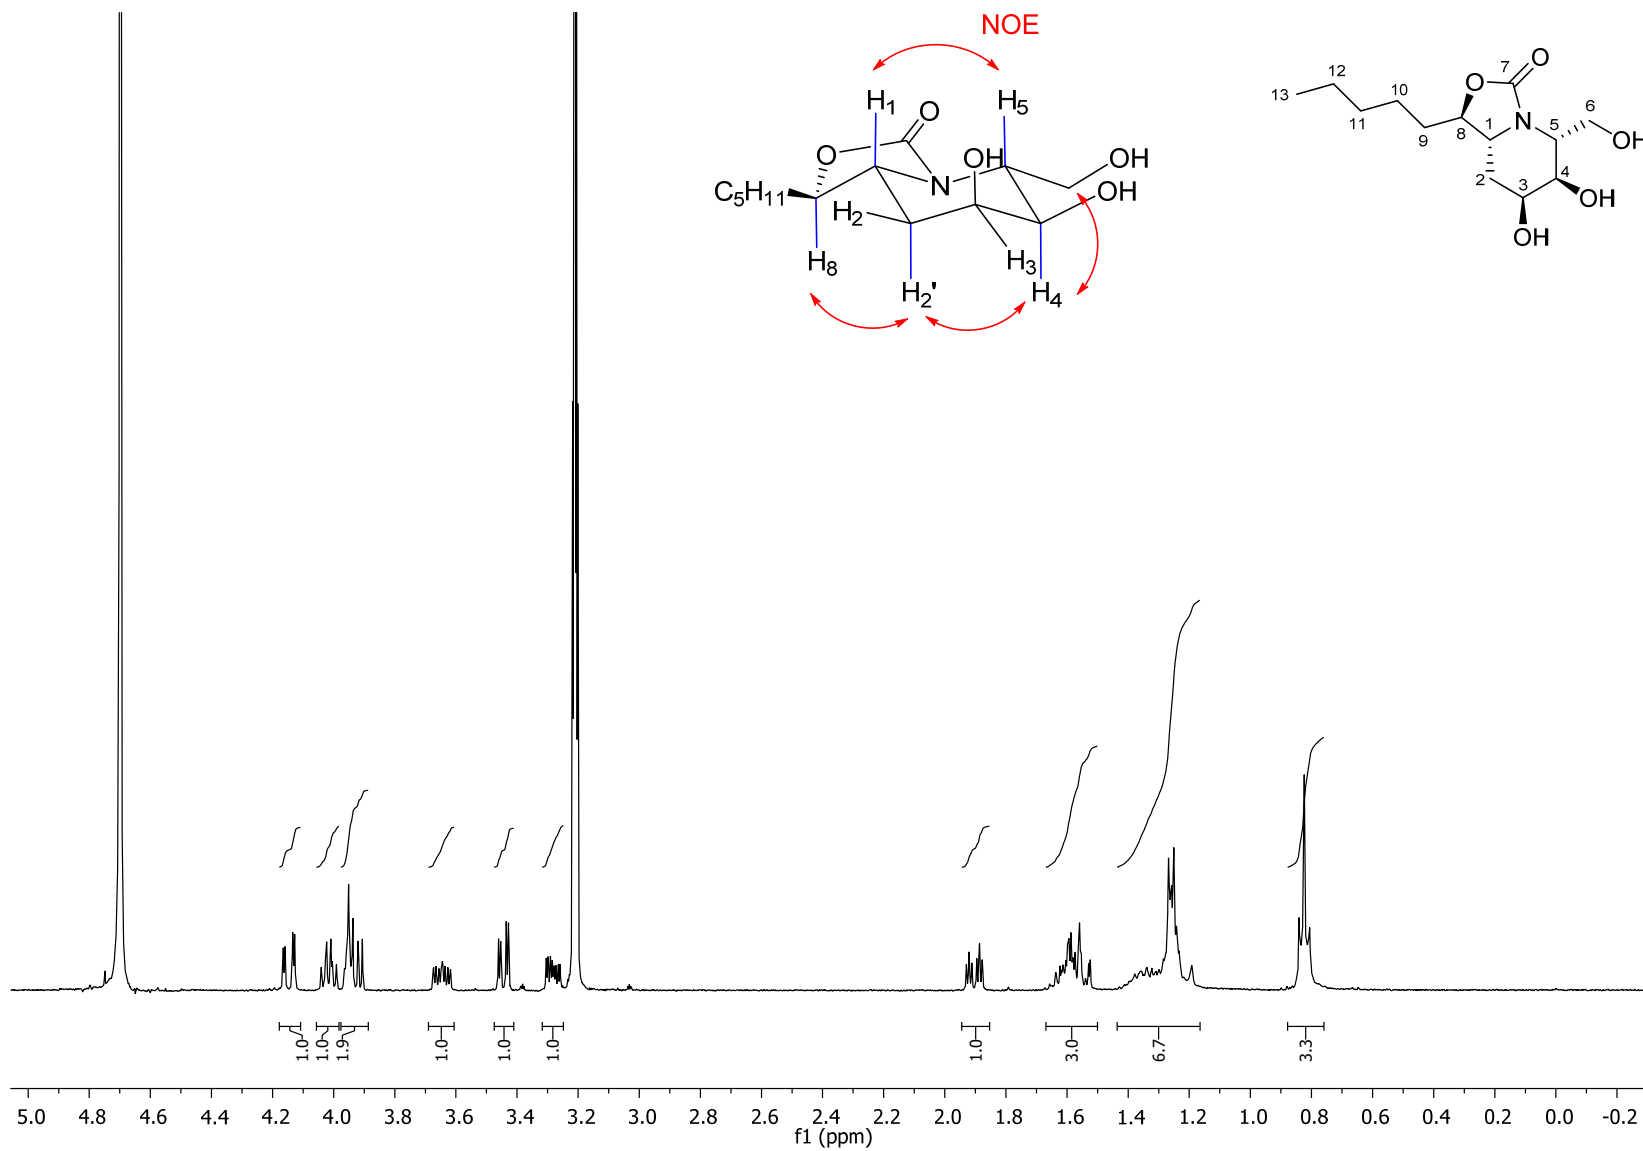

$^{13}\text{C}$  NMR of compound **16** (100 MHz,  $\text{CD}_3\text{OD}$ , 300K)

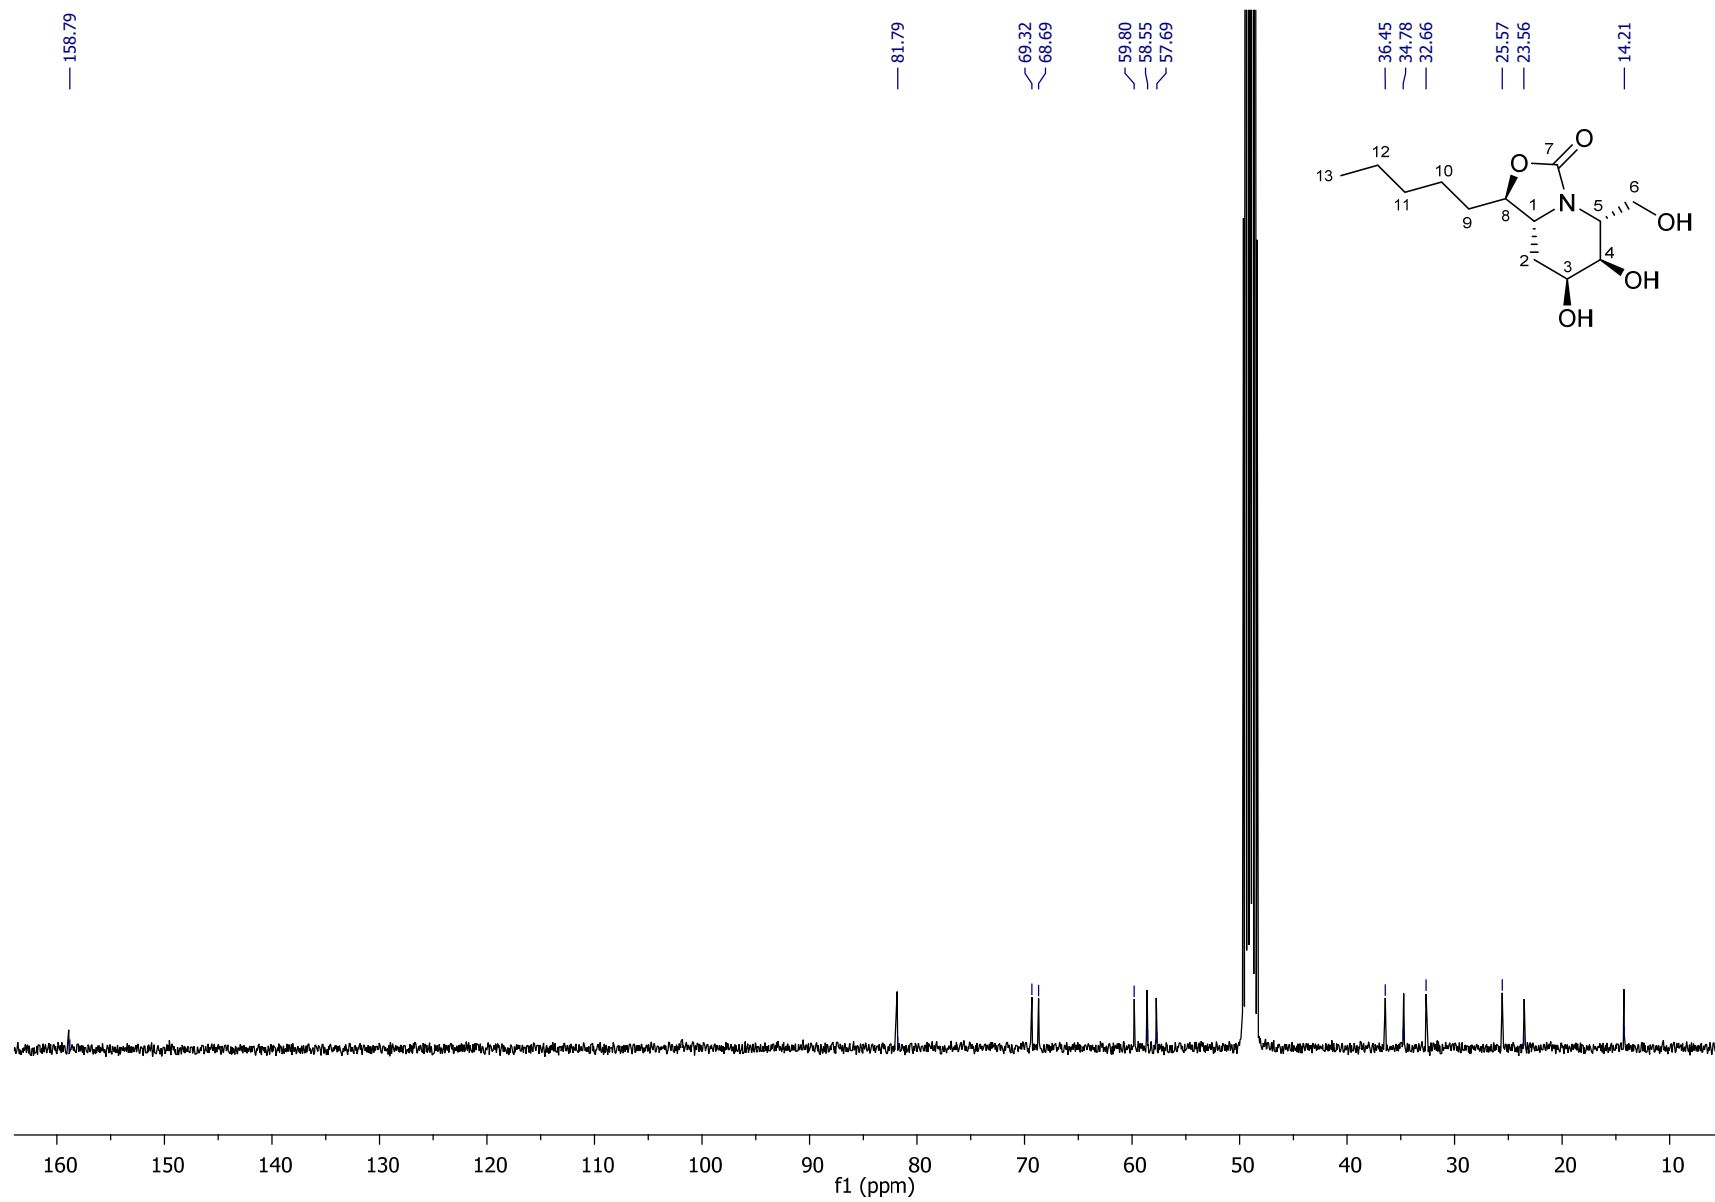



$^1\text{H}$  NMR of compound **17** (*dr* = 67/33) in (300 MHz,  $\text{CDCl}_3$ , 300K)

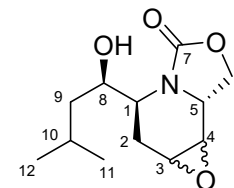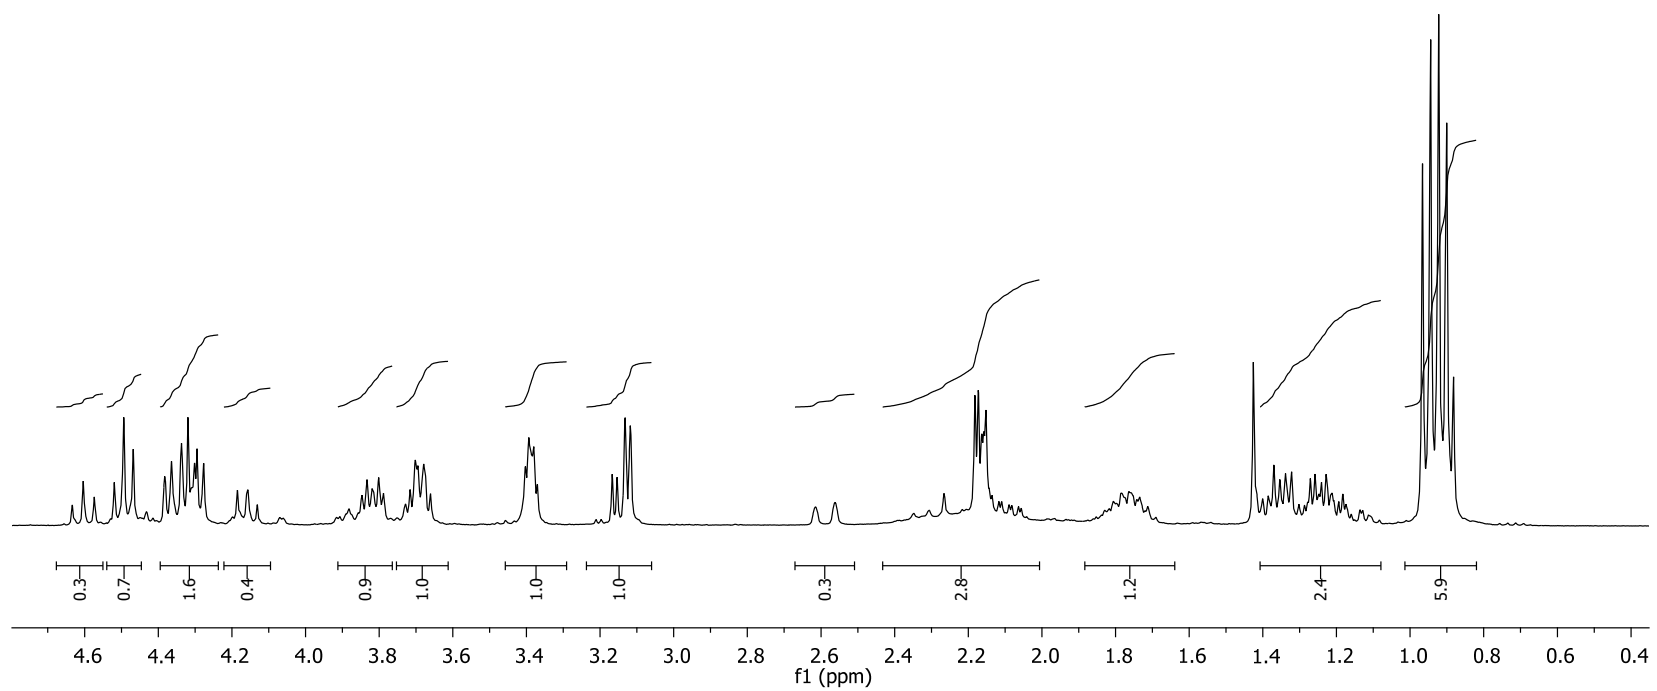

$^{13}\text{C}$  NMR of compound **17** (*dr* = 67/33) (75 MHz,  $\text{CDCl}_3$ , 300K)

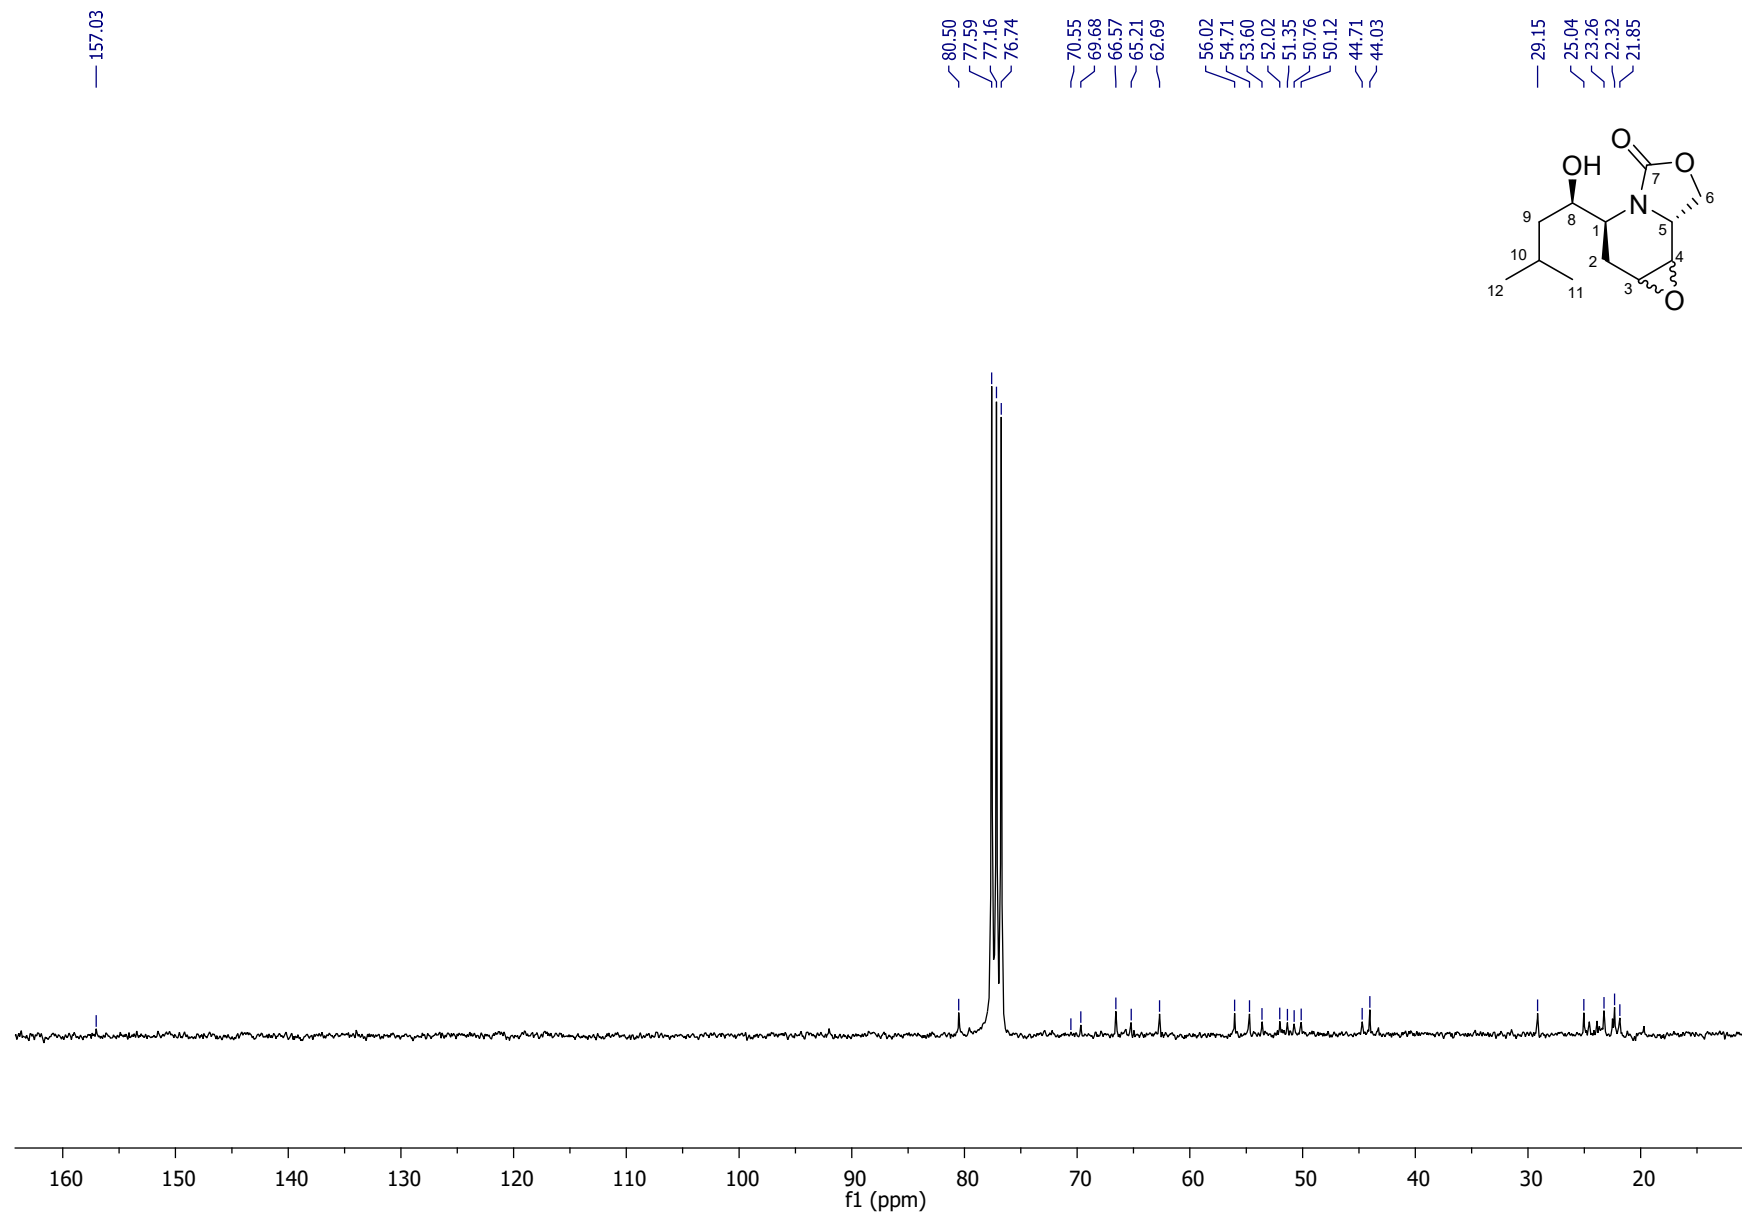

$^1\text{H}$  NMR of compound **18** in (300 MHz,  $\text{CDCl}_3$ , 300K)

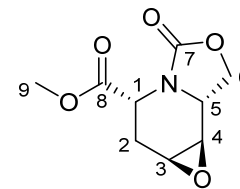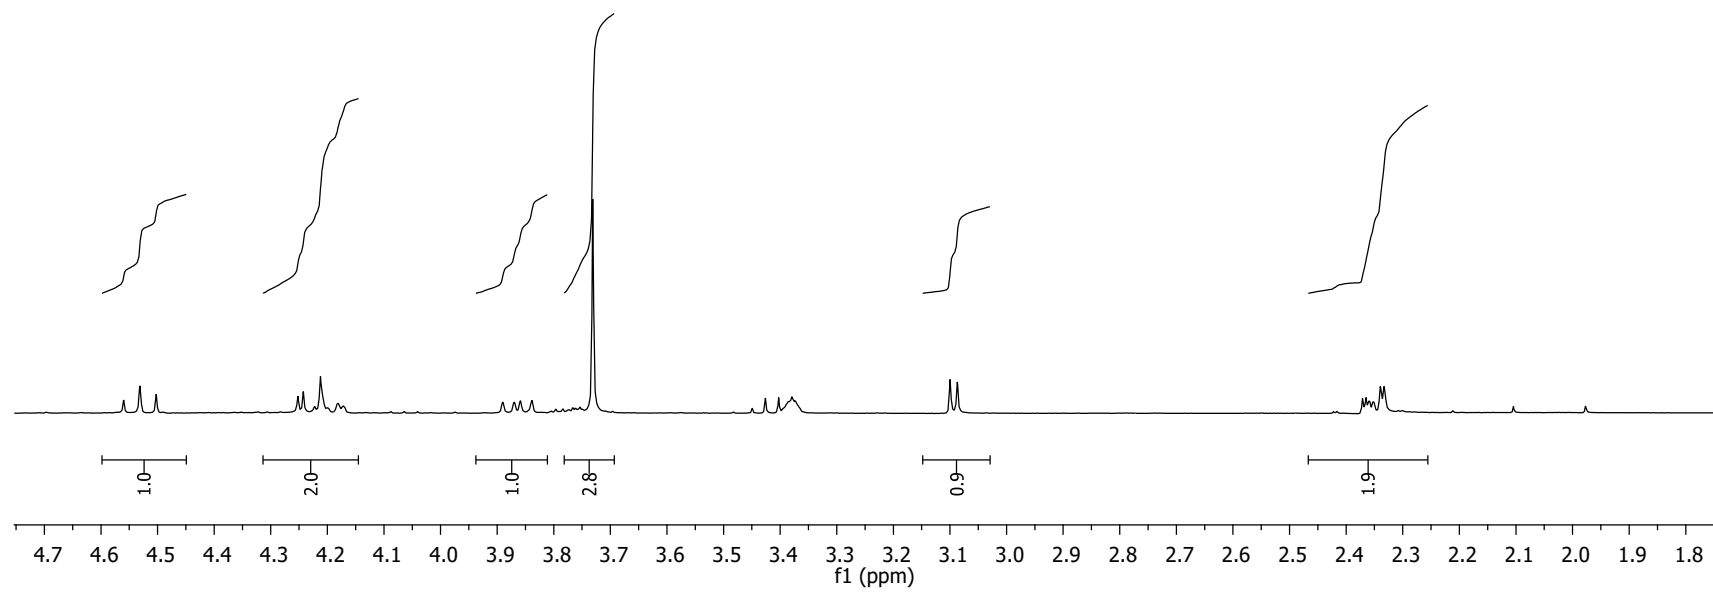

$^{13}\text{C}$  NMR of compound **18** (75 MHz,  $\text{CDCl}_3$ , 300K)

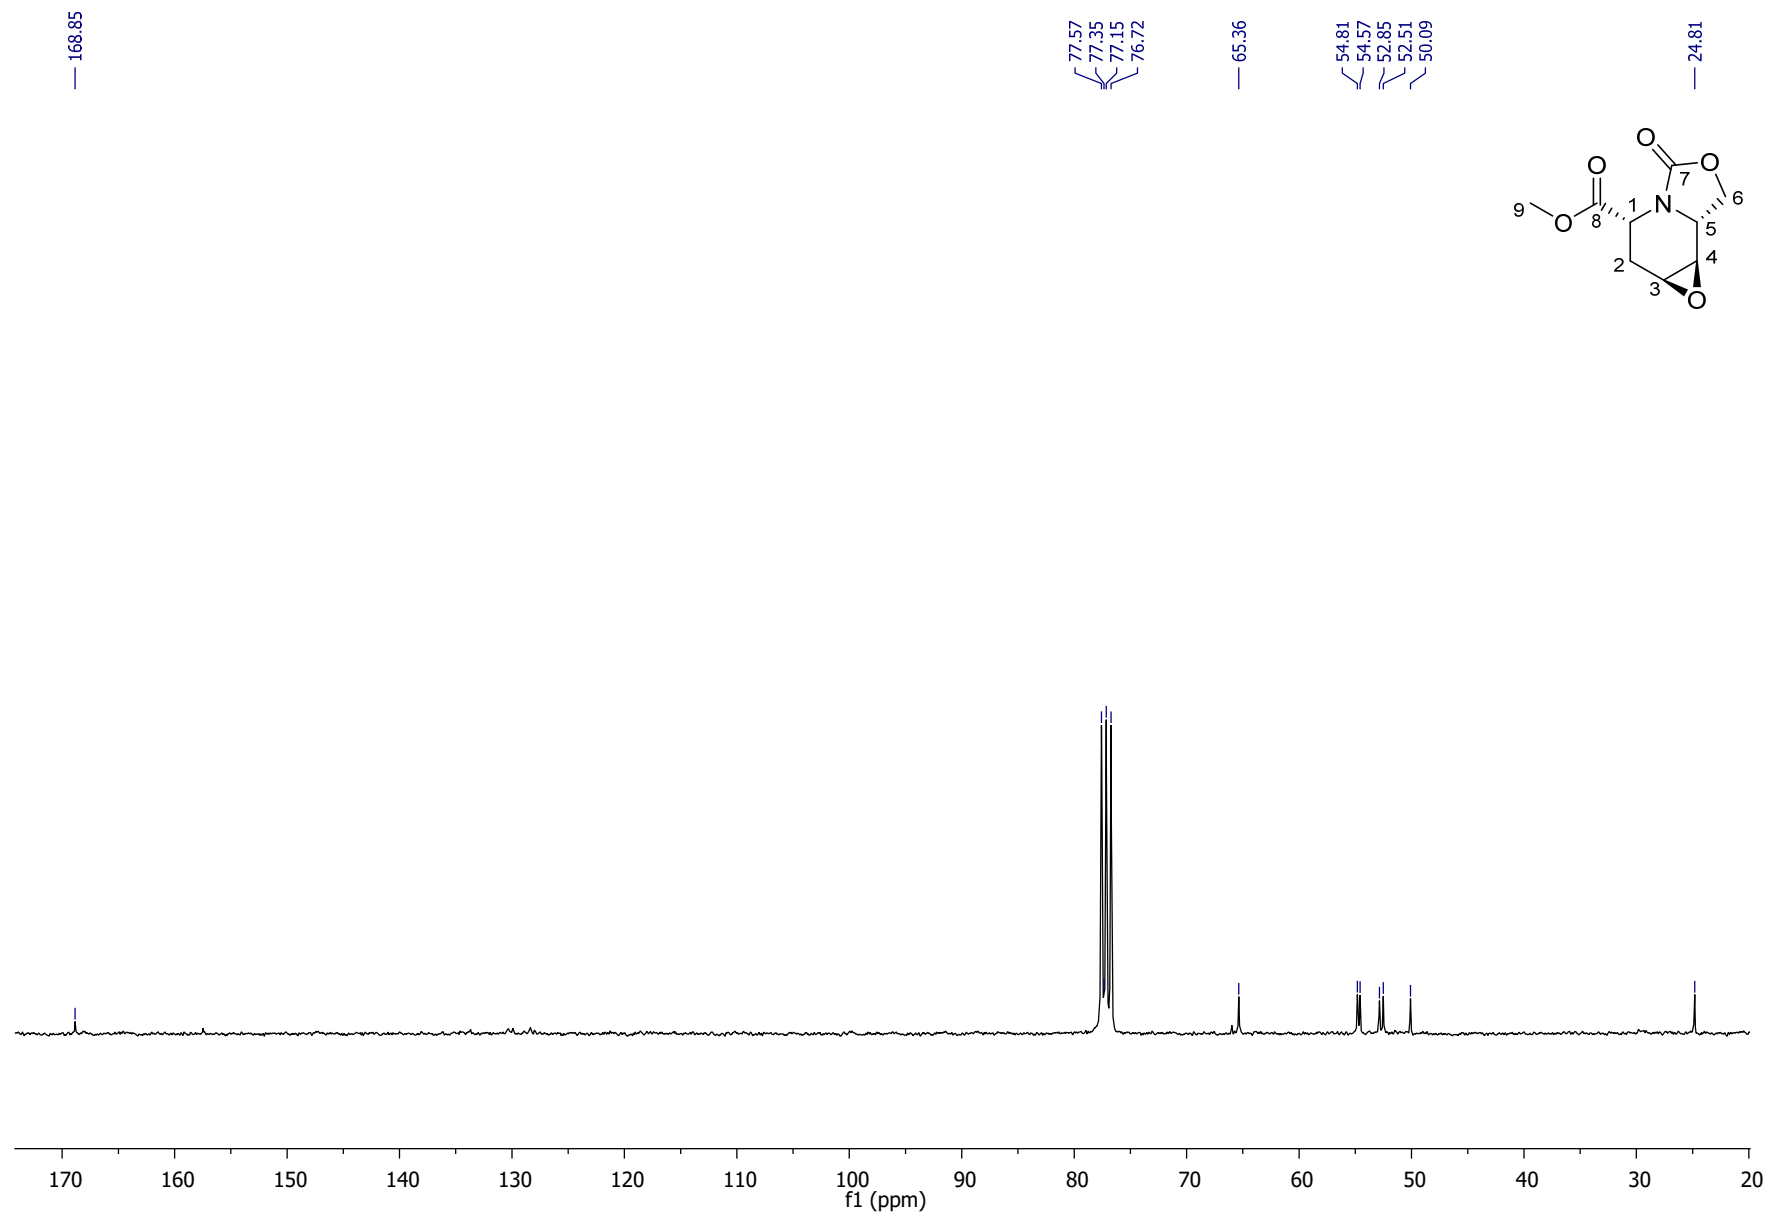

$^1\text{H}$  NMR of compound **19'** (400 MHz,  $\text{CDCl}_3$ , 300K) obtained from **19-exo**

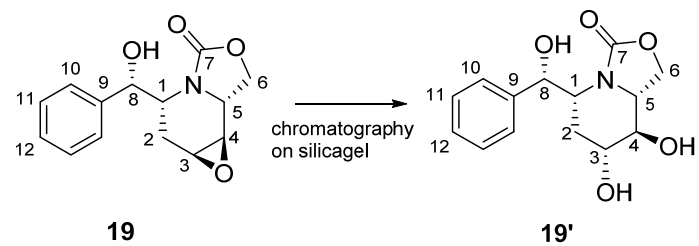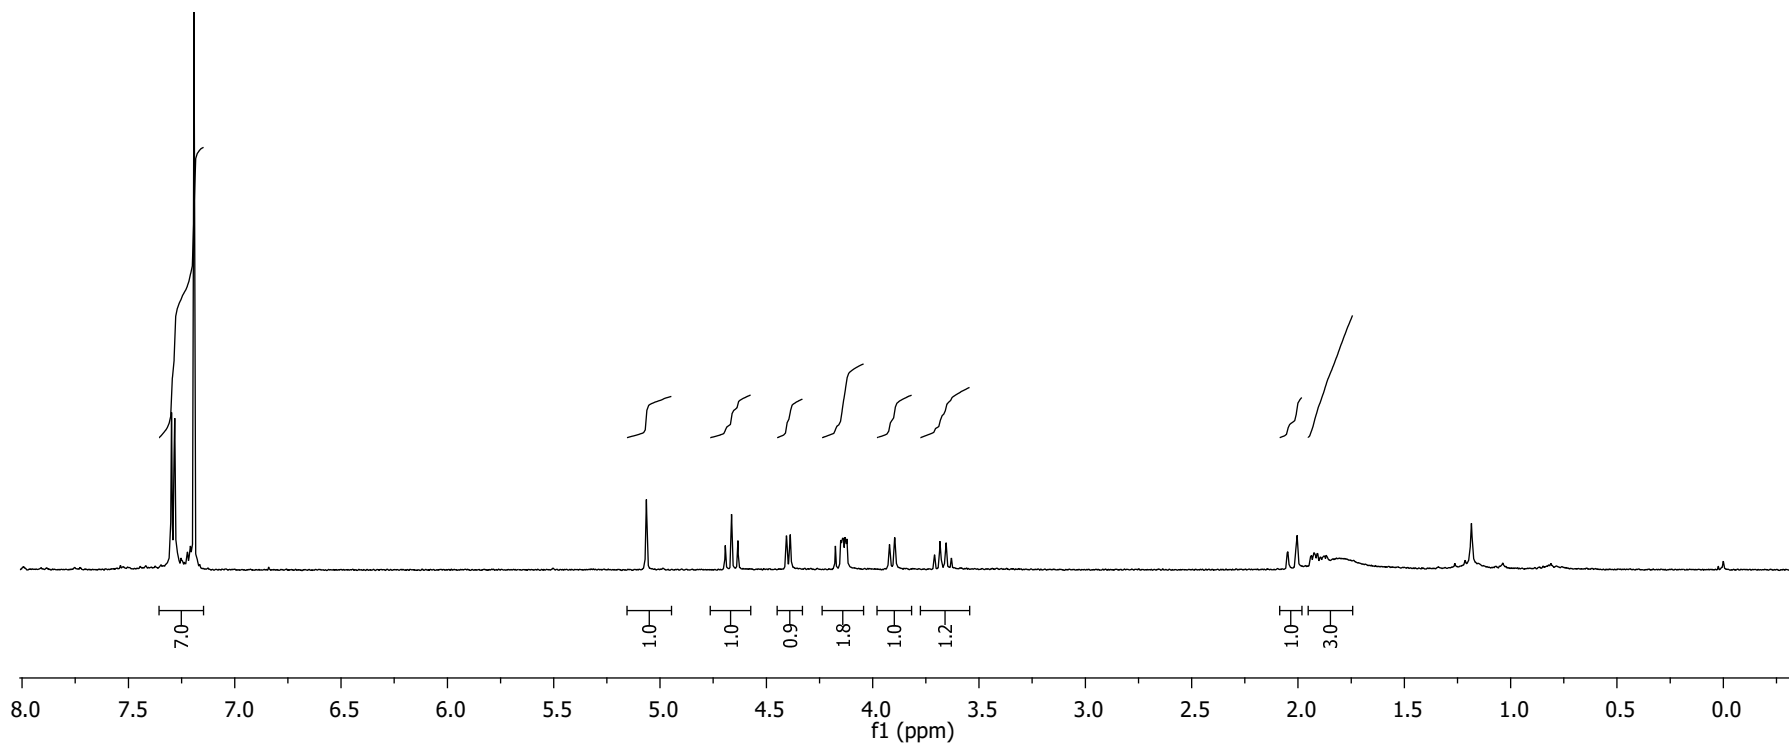

$^{13}\text{C}$  NMR of compound **19'** (100 MHz,  $\text{CDCl}_3$ , 300K) obtained from **19-exo**

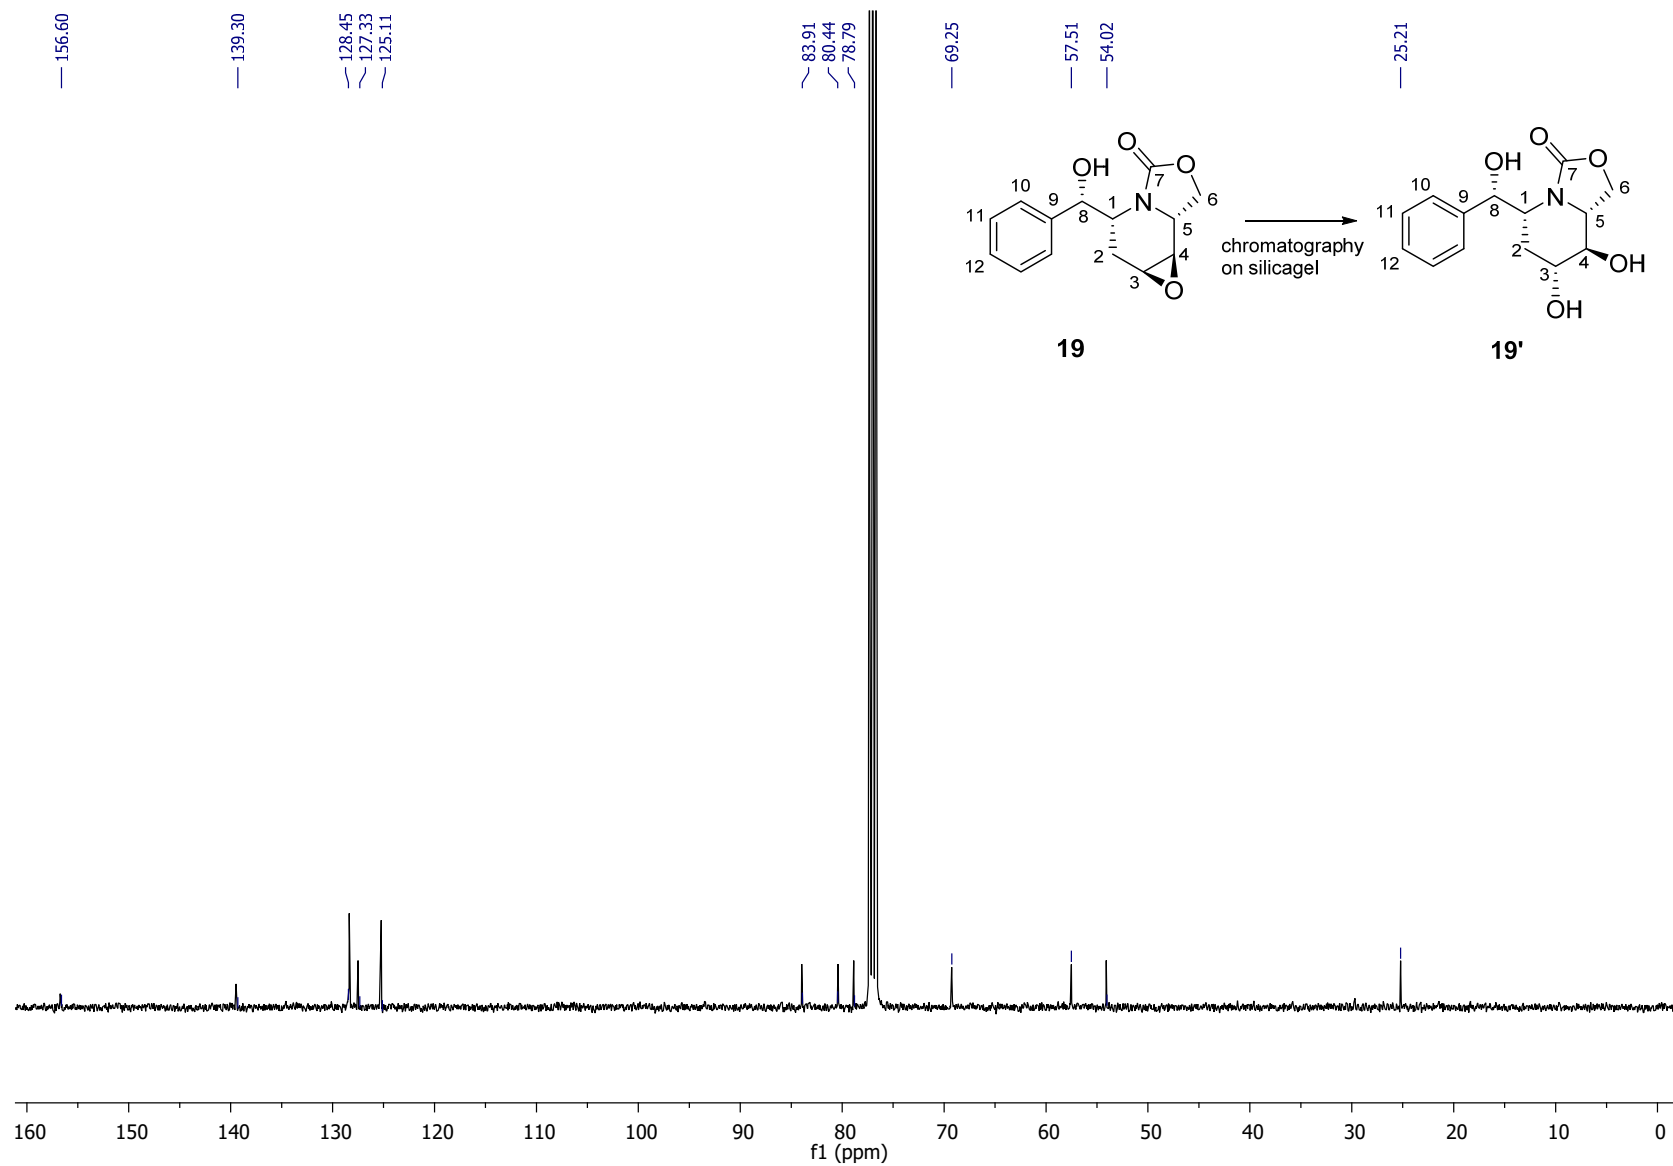

$^1\text{H}$  NMR compound **19-endo** (300 MHz,  $\text{CDCl}_3$ , 300K)

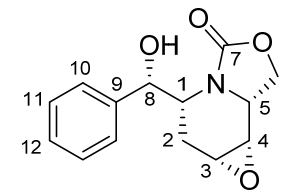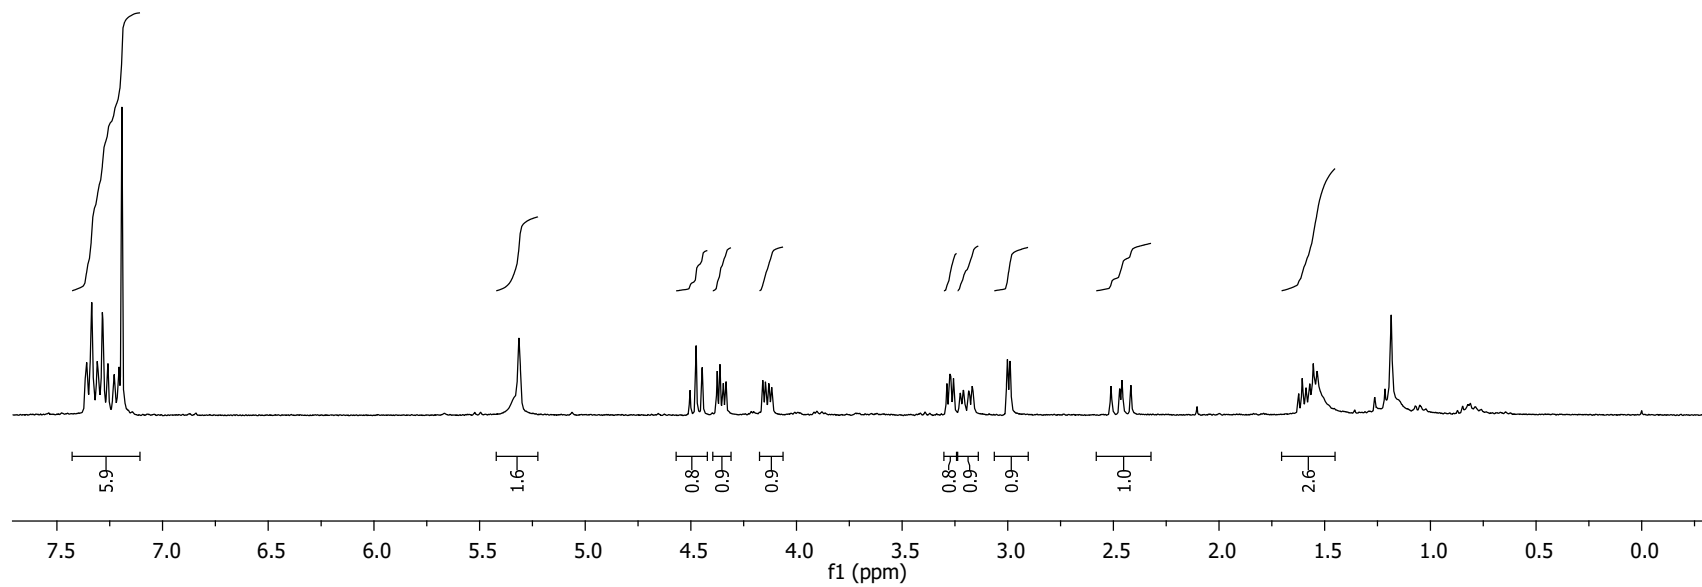

$^{13}\text{C}$  NMR compound **19-endo** (75 MHz,  $\text{CDCl}_3$ , 300K)

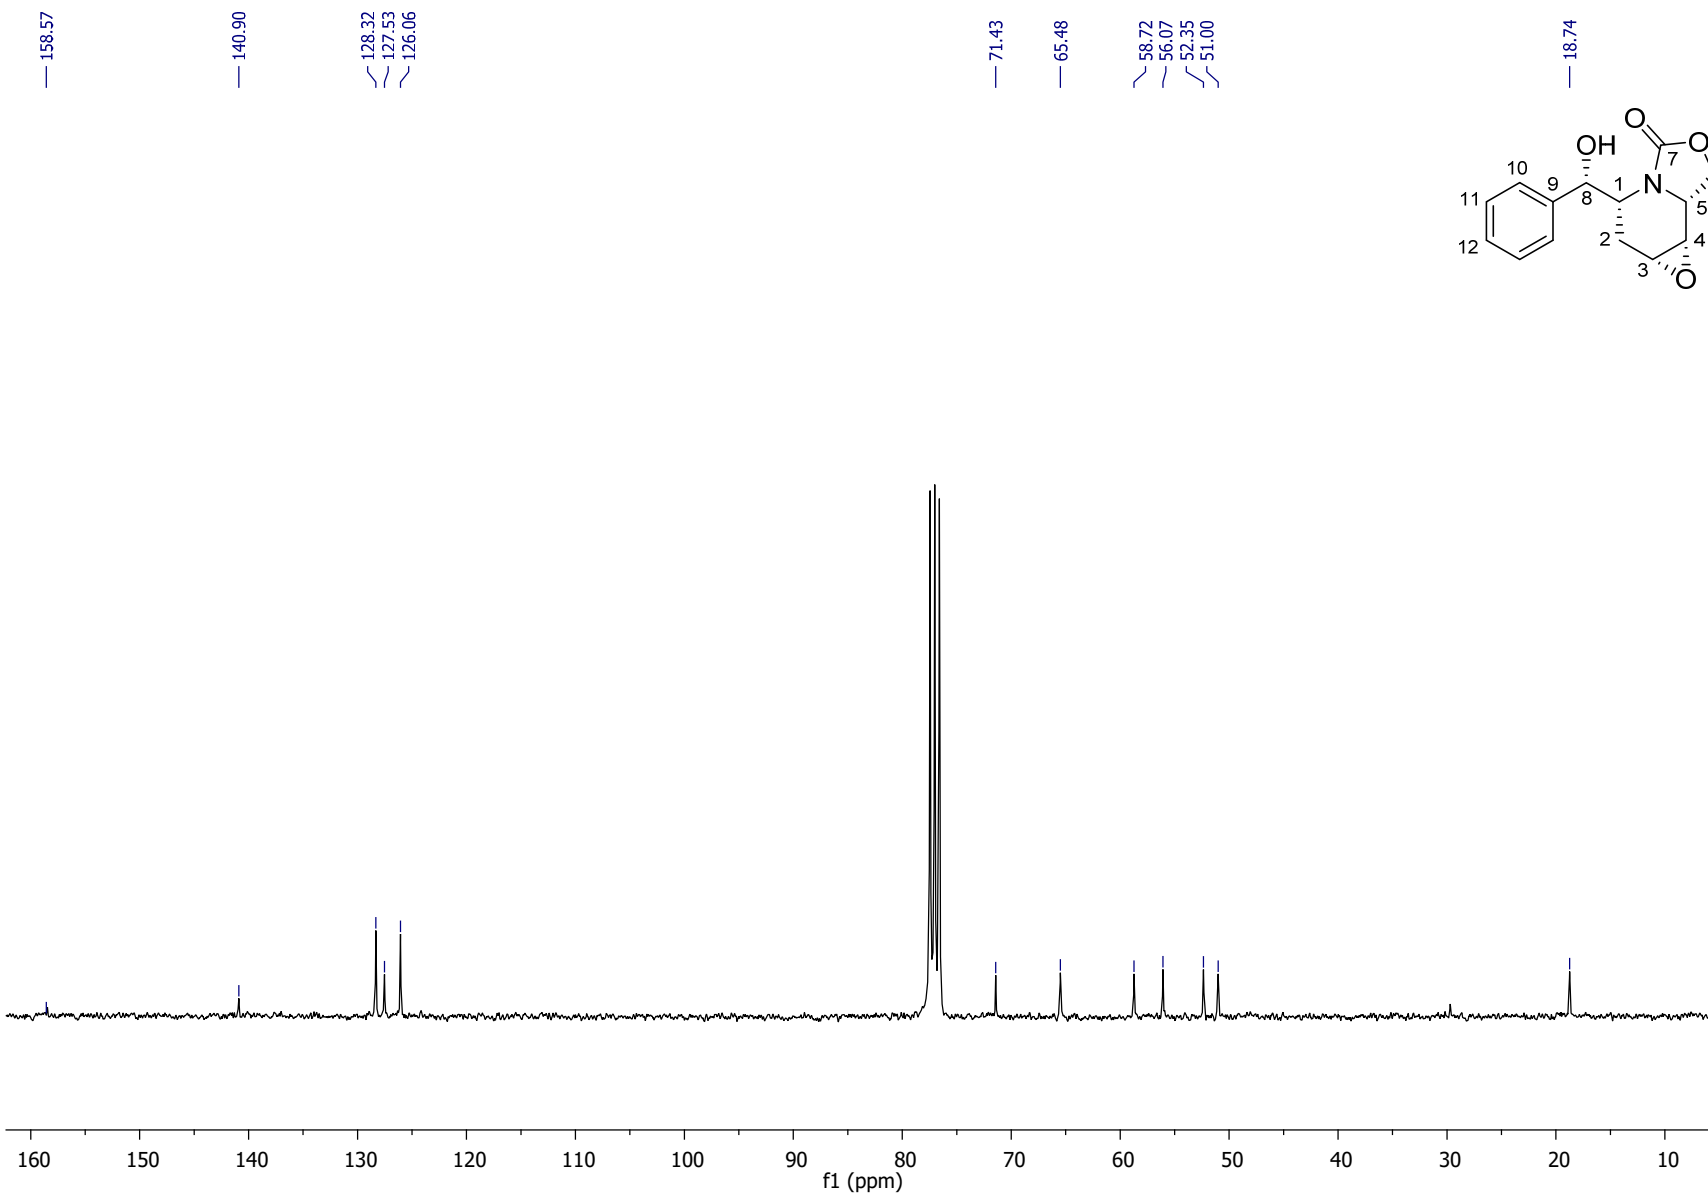



$^1\text{H}$  NMR of compound **20-*exo*** (400 MHz,  $\text{CDCl}_3$ , 300K)

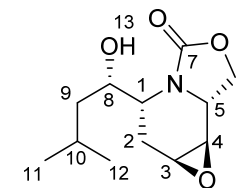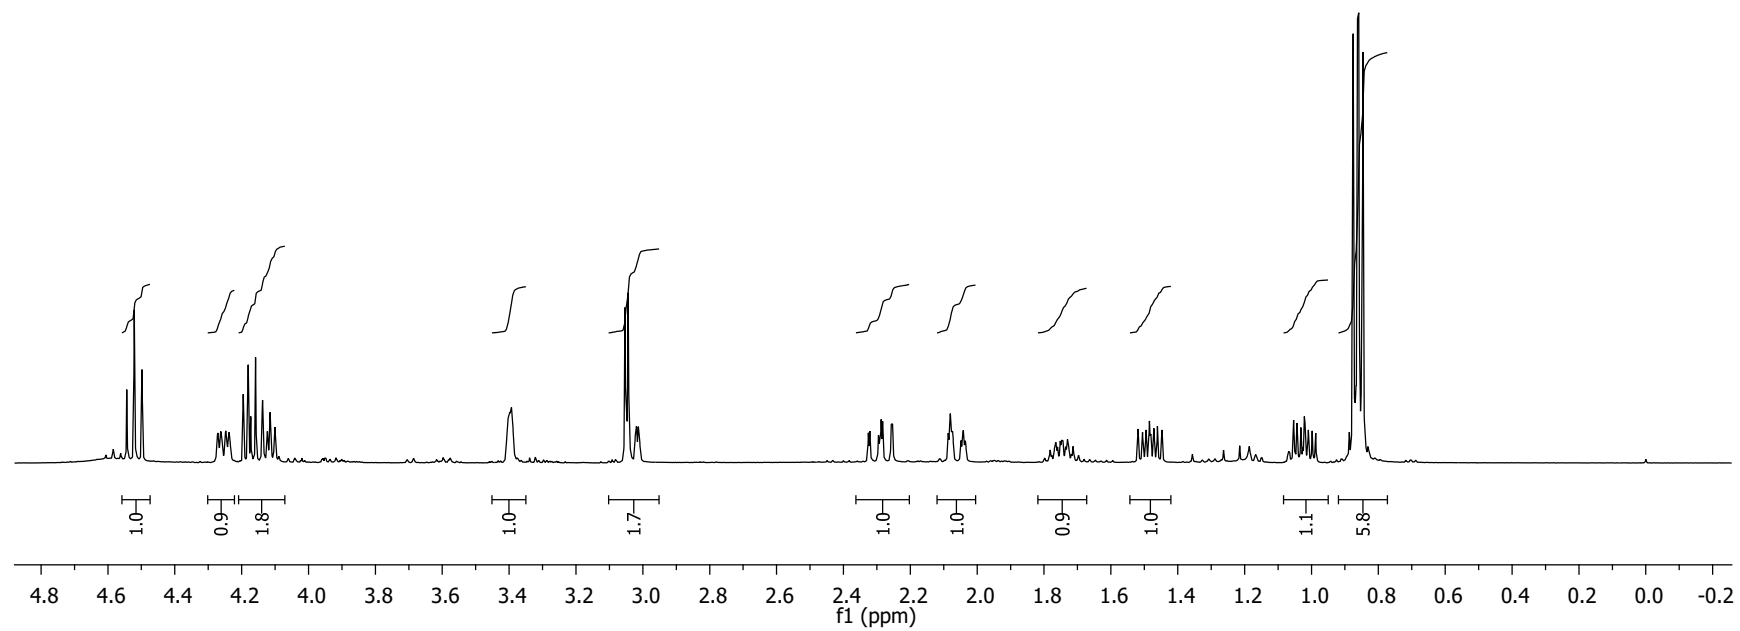

$^{13}\text{C}$  NMR of compound **20-exo** (100 MHz,  $\text{CDCl}_3$ , 300K)

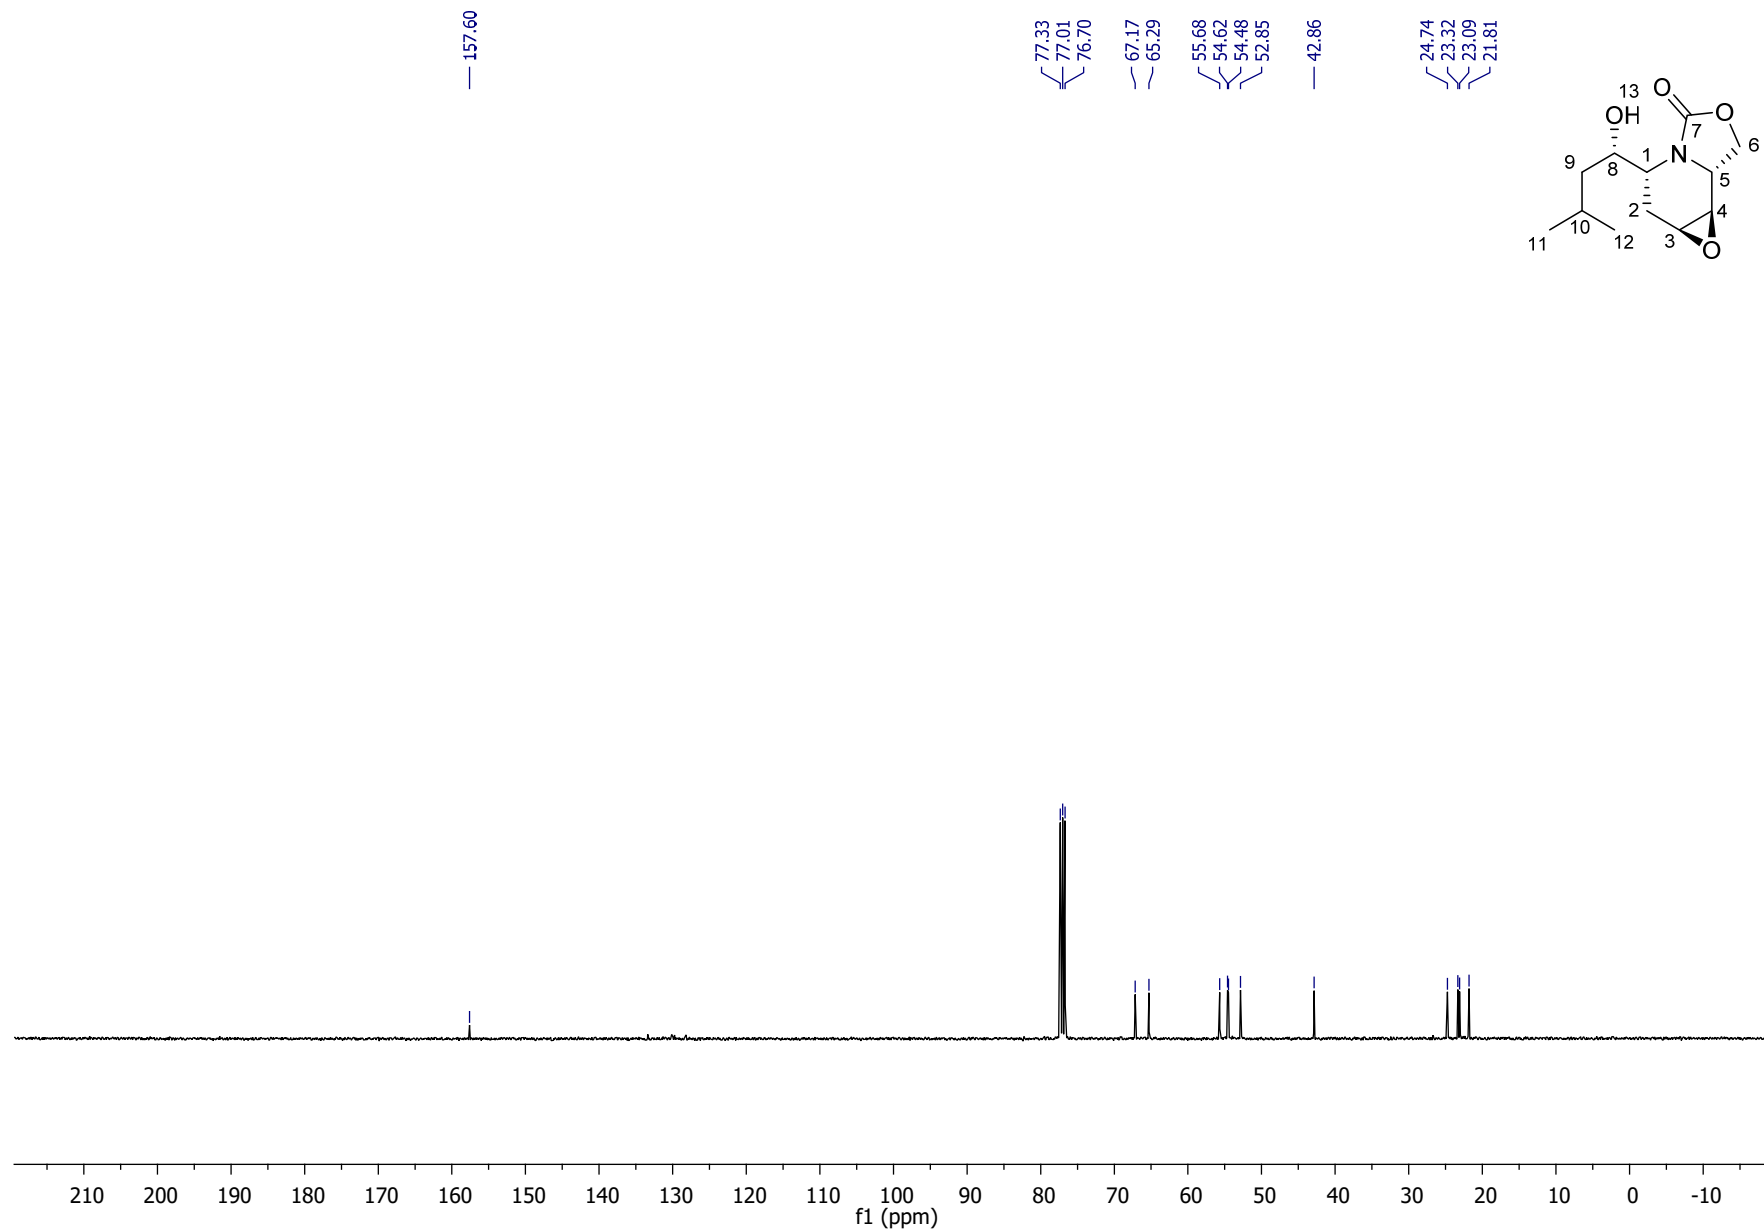

$^1\text{H}$  NMR of compound **20-endo** (300 MHz,  $\text{CDCl}_3$  300K)

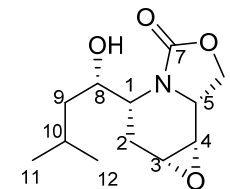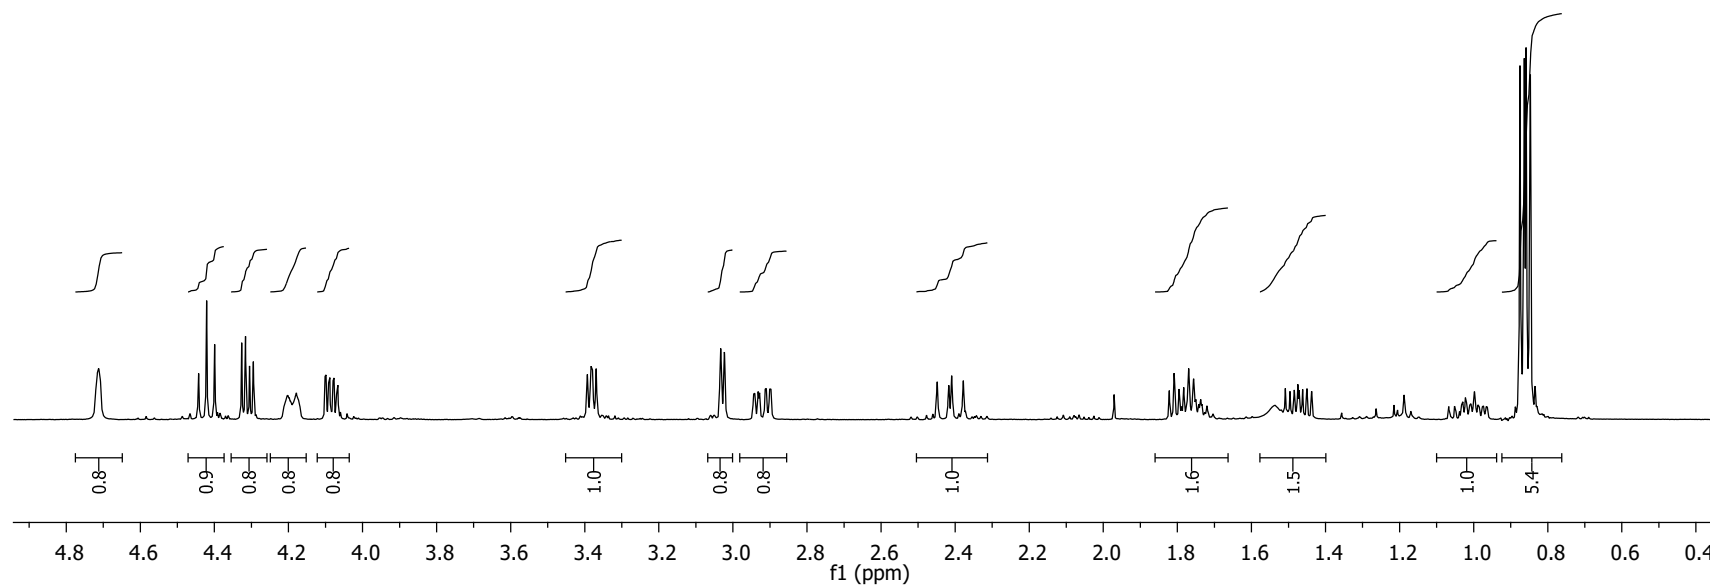

$^{13}\text{C}$  NMR of compound **20-endo** (100 MHz,  $\text{CDCl}_3$ , 300K)

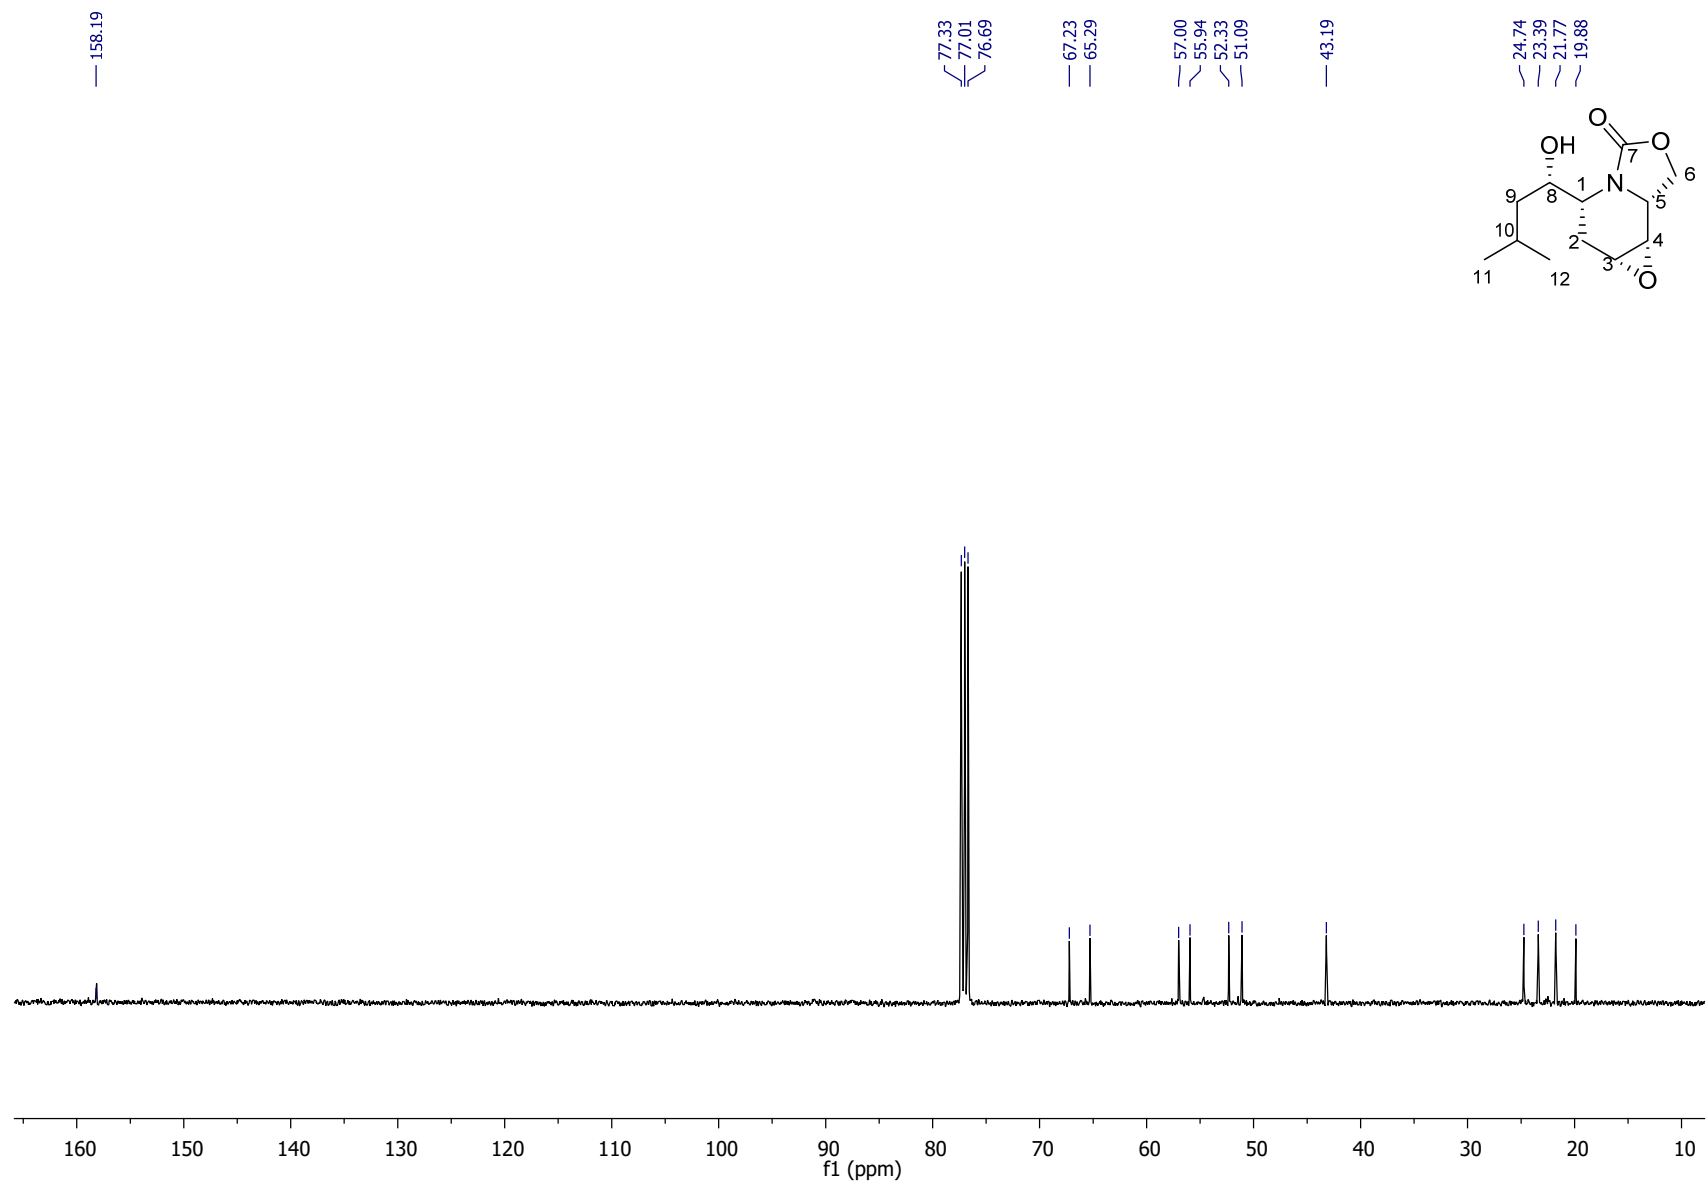

## Discrimination between *exo* and *endo* epoxides

Having in hand the radiocrystallographic structure of **18-*exo***, the assignment of the *exo* or *endo* epoxide was established on the basis of NMR spectra, including chemical shift of epoxide carbons in  $^{13}\text{C}$  NMR spectrometry and meaningful vicinal coupling constants or meaningful NOE effects as indicated on the following schemes.

### Major (18-*exo*)

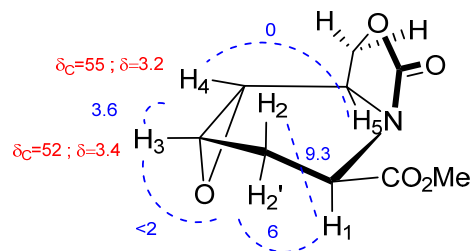

Conformation and configuration corroborated by radiocrystallographic structure

### Major (19-*endo*)

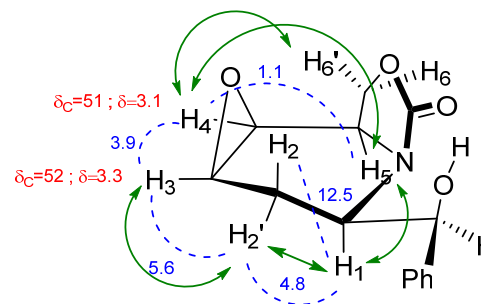

### Minor (20-*exo*)

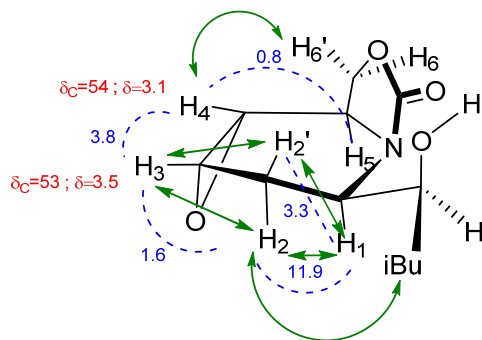

### Major (20-*endo*)

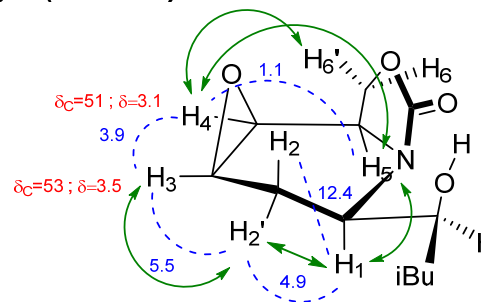

$^1\text{H}$  NMR of compound **21** (300 MHz,  $\text{CDCl}_3$ , 300K)

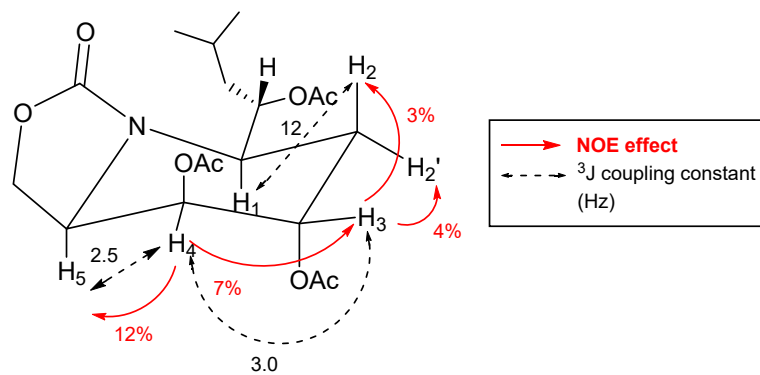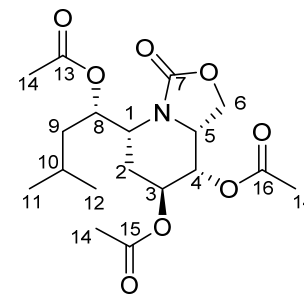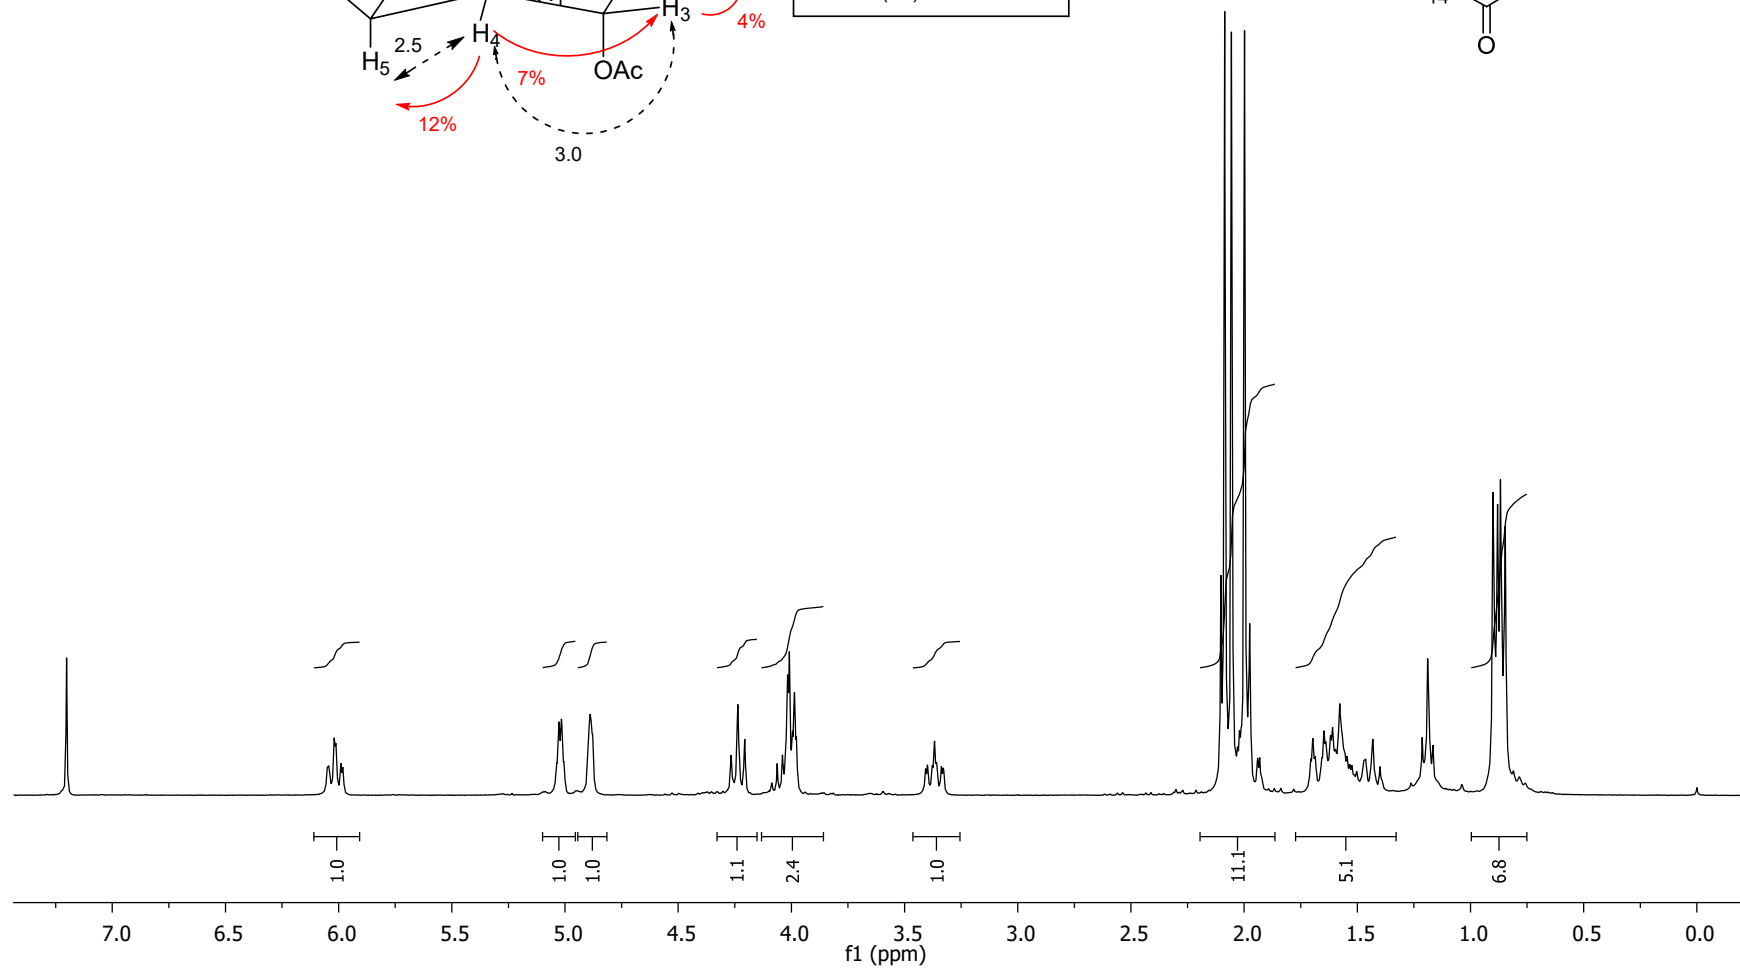

$^{13}\text{C}$  NMR of compound **21** (75 MHz,  $\text{CDCl}_3$ , 300K)

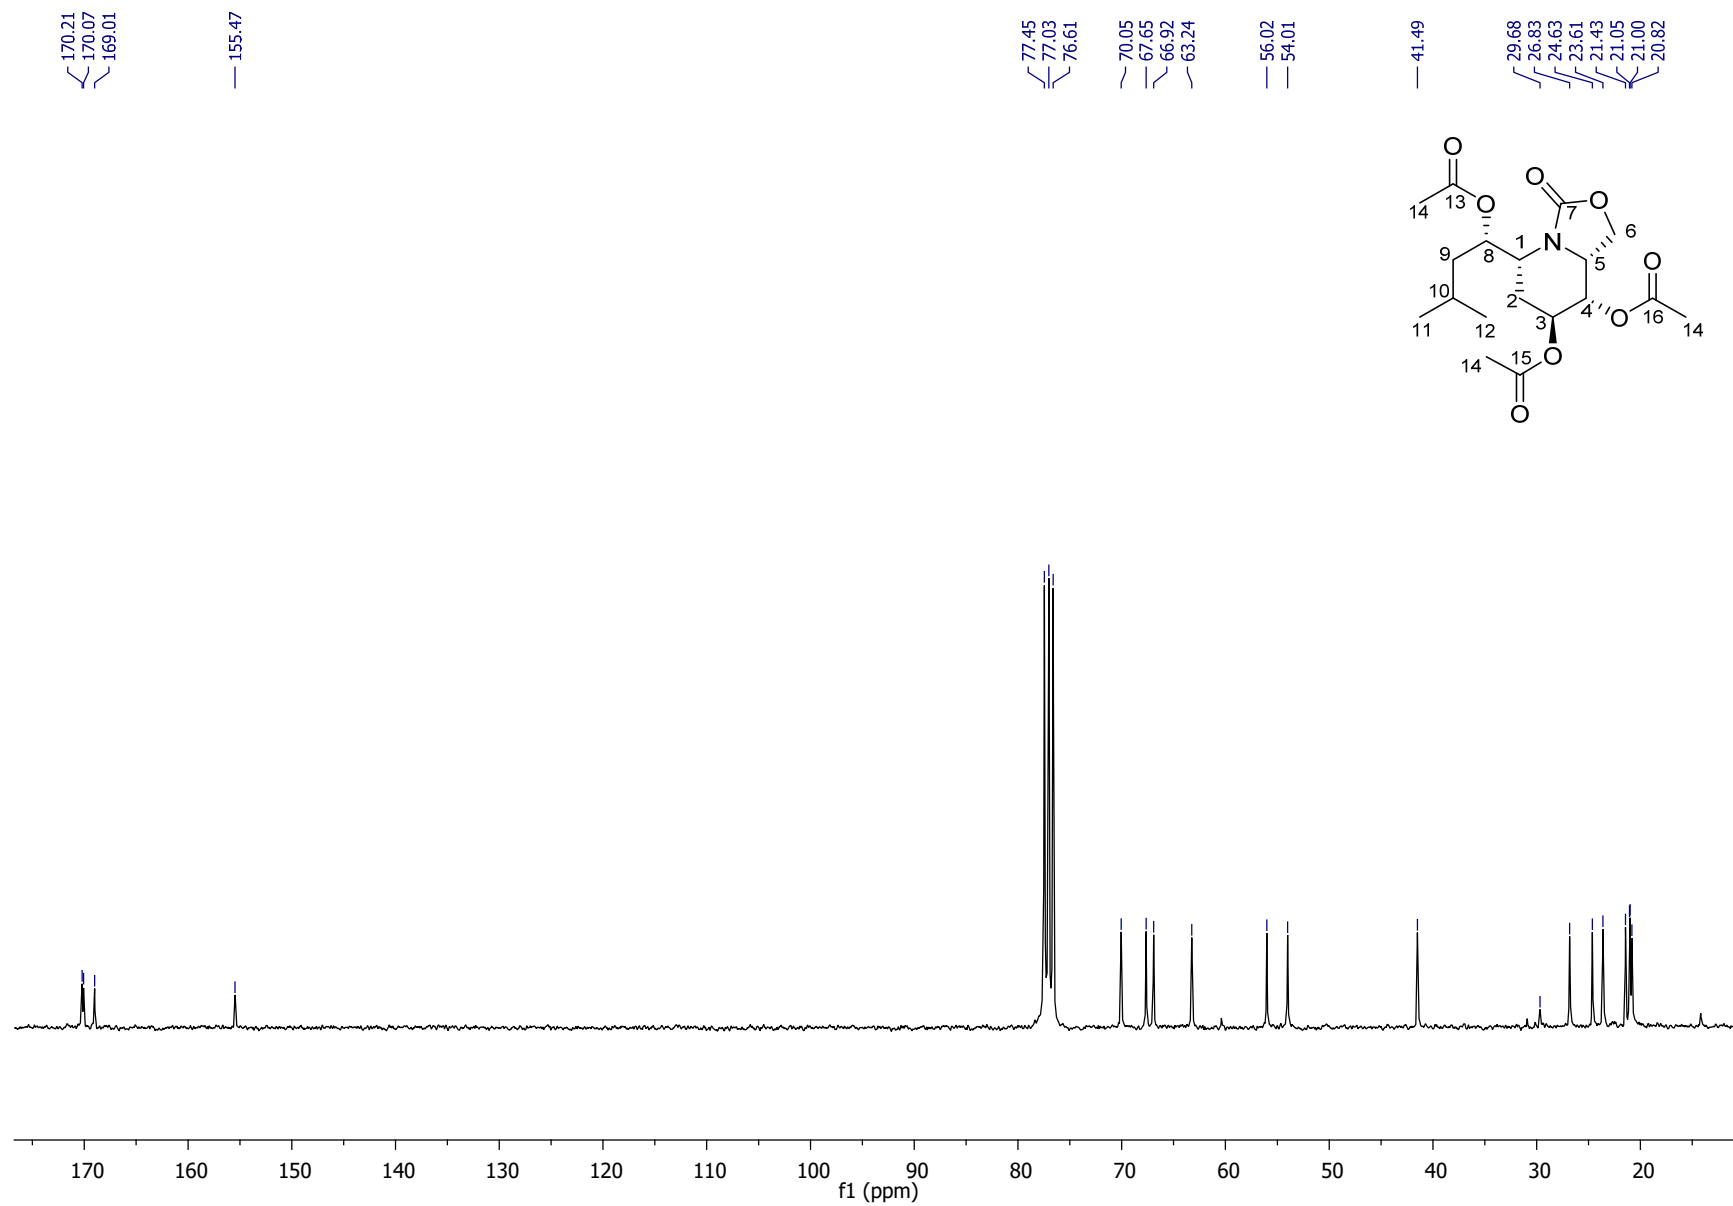

$^1\text{H}$  NMR spectrum of compound **22** (400 MHz,  $\text{CDCl}_3$ , 300K)

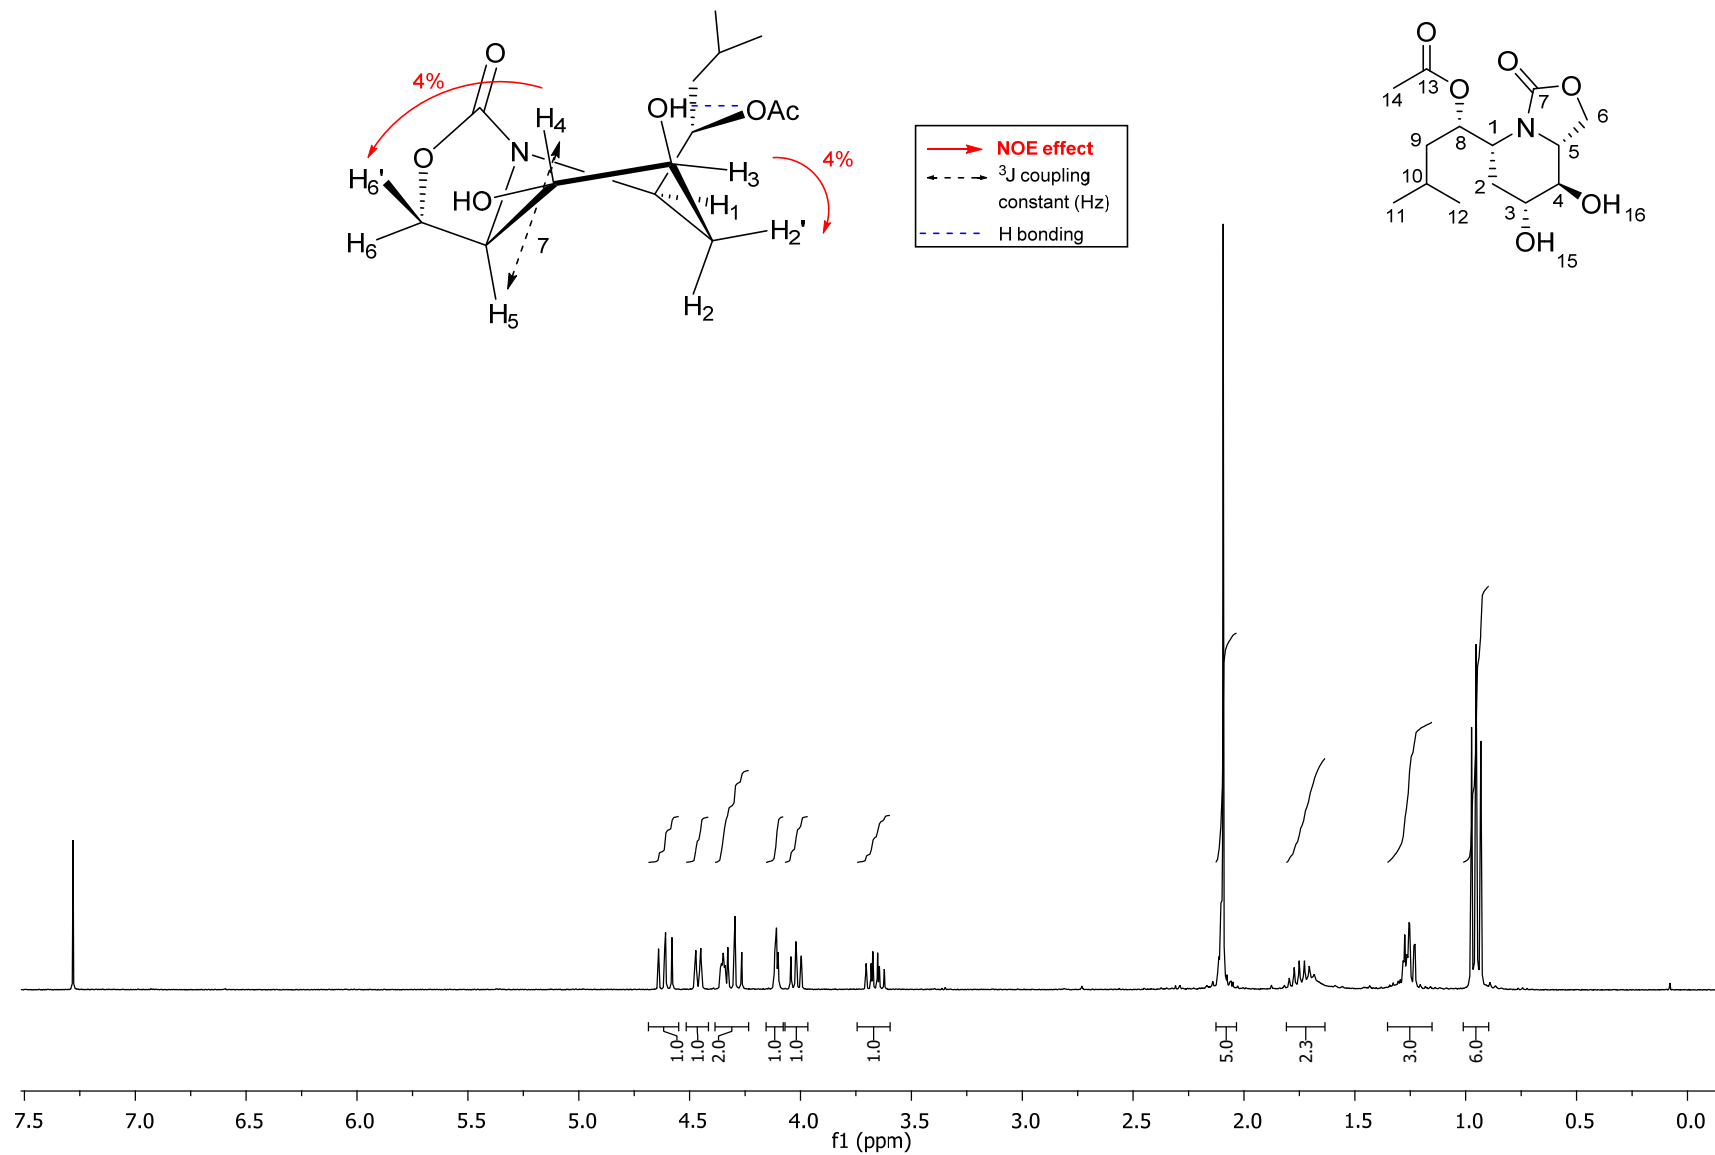



$^{13}\text{C}$  NMR of compound **22** (100 MHz,  $\text{CDCl}_3$ , 300K)

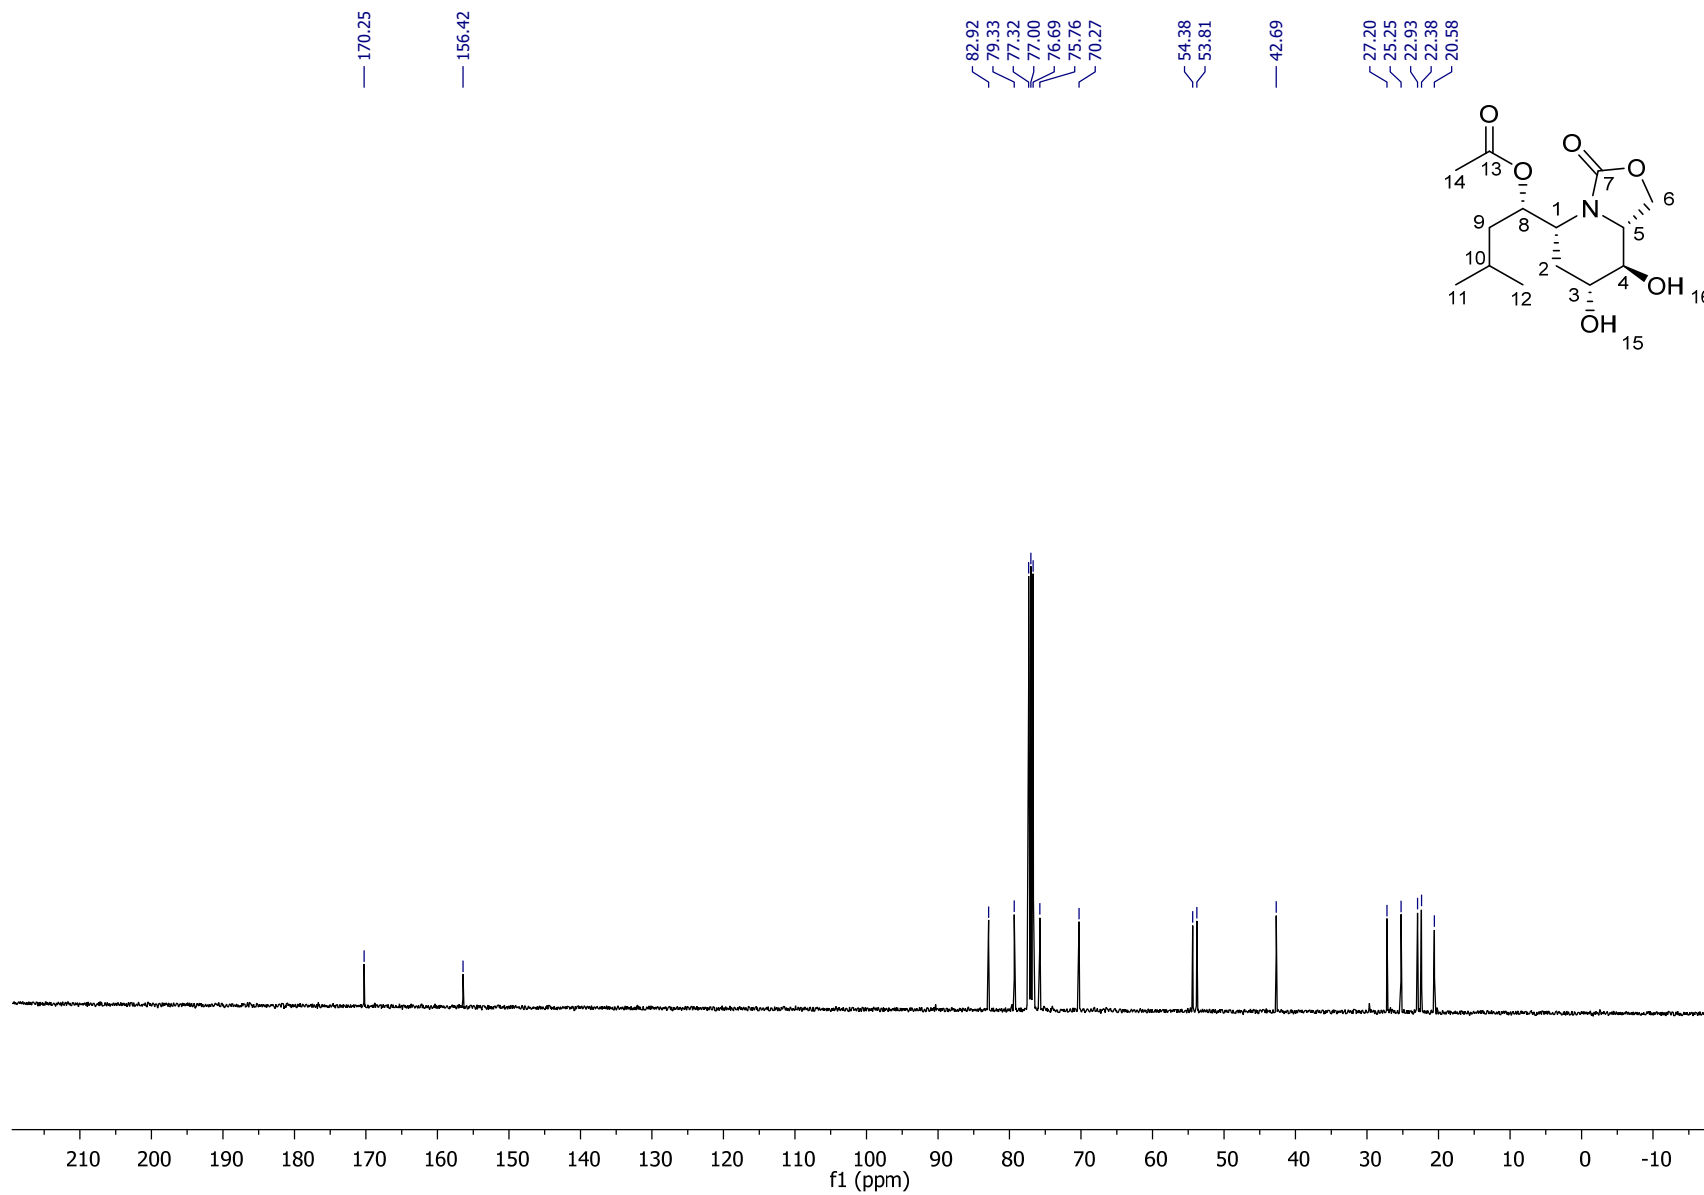

$^1\text{H}$  NMR of compound **23** (400 MHz,  $\text{CD}_3\text{OD}$ , 300K)

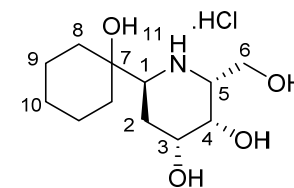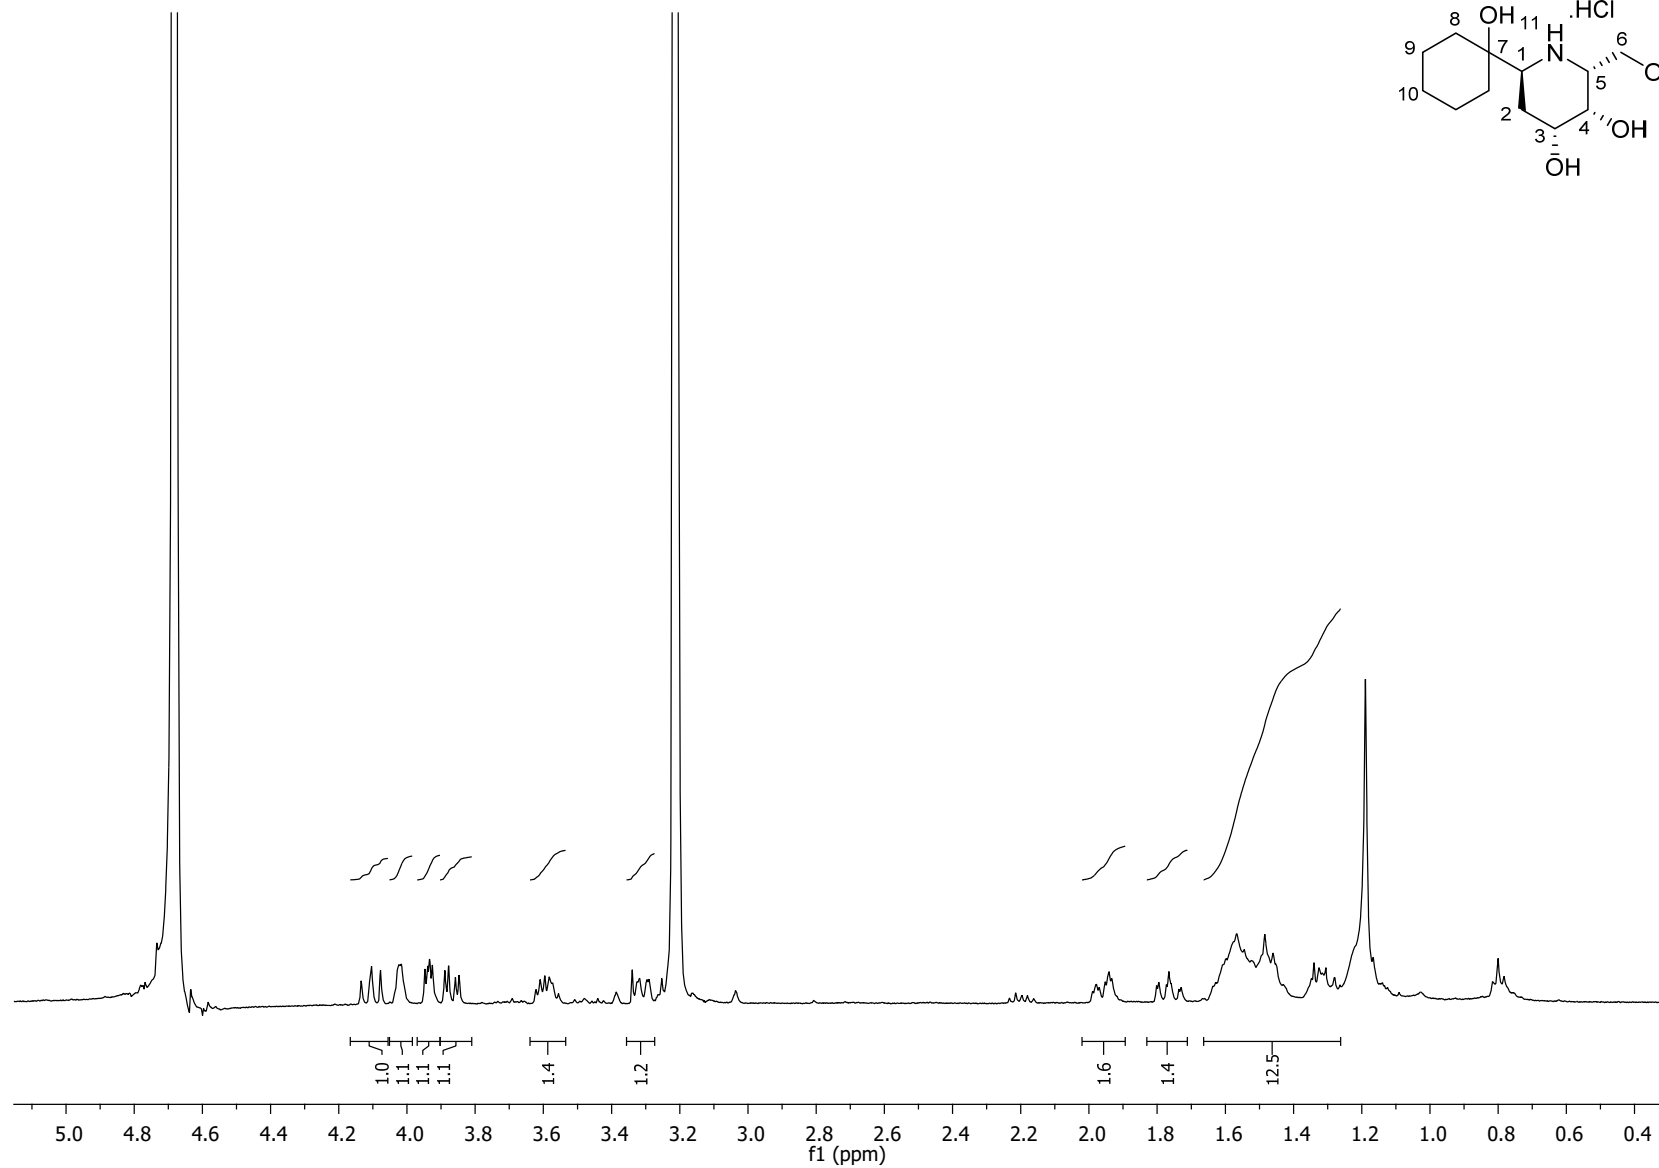

$^{13}\text{C}$  NMR of compound **23** (100 MHz,  $\text{CD}_3\text{OD}$ , 300K)

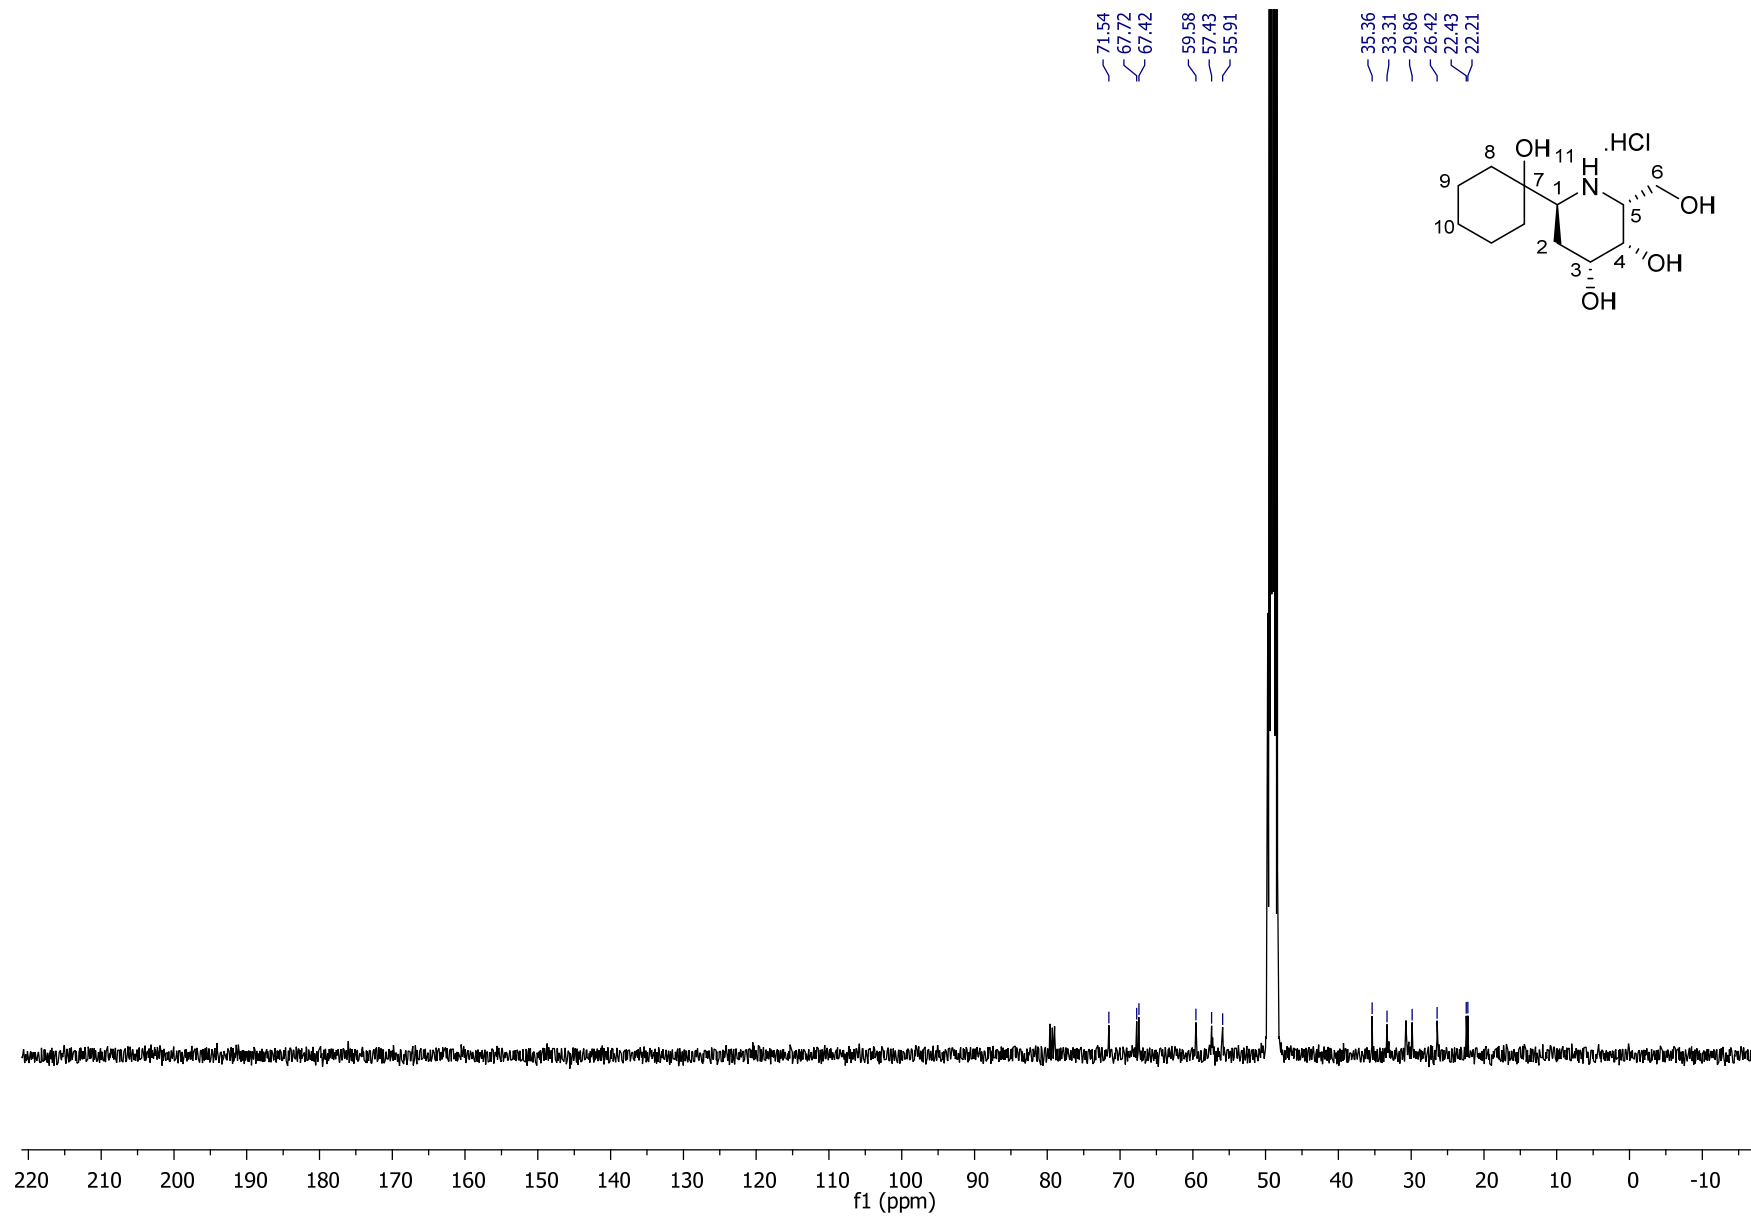

$^1\text{H}$  NMR spectrum of compound **24** (400 MHz,  $\text{CH}_3\text{OD}$ , 300K)

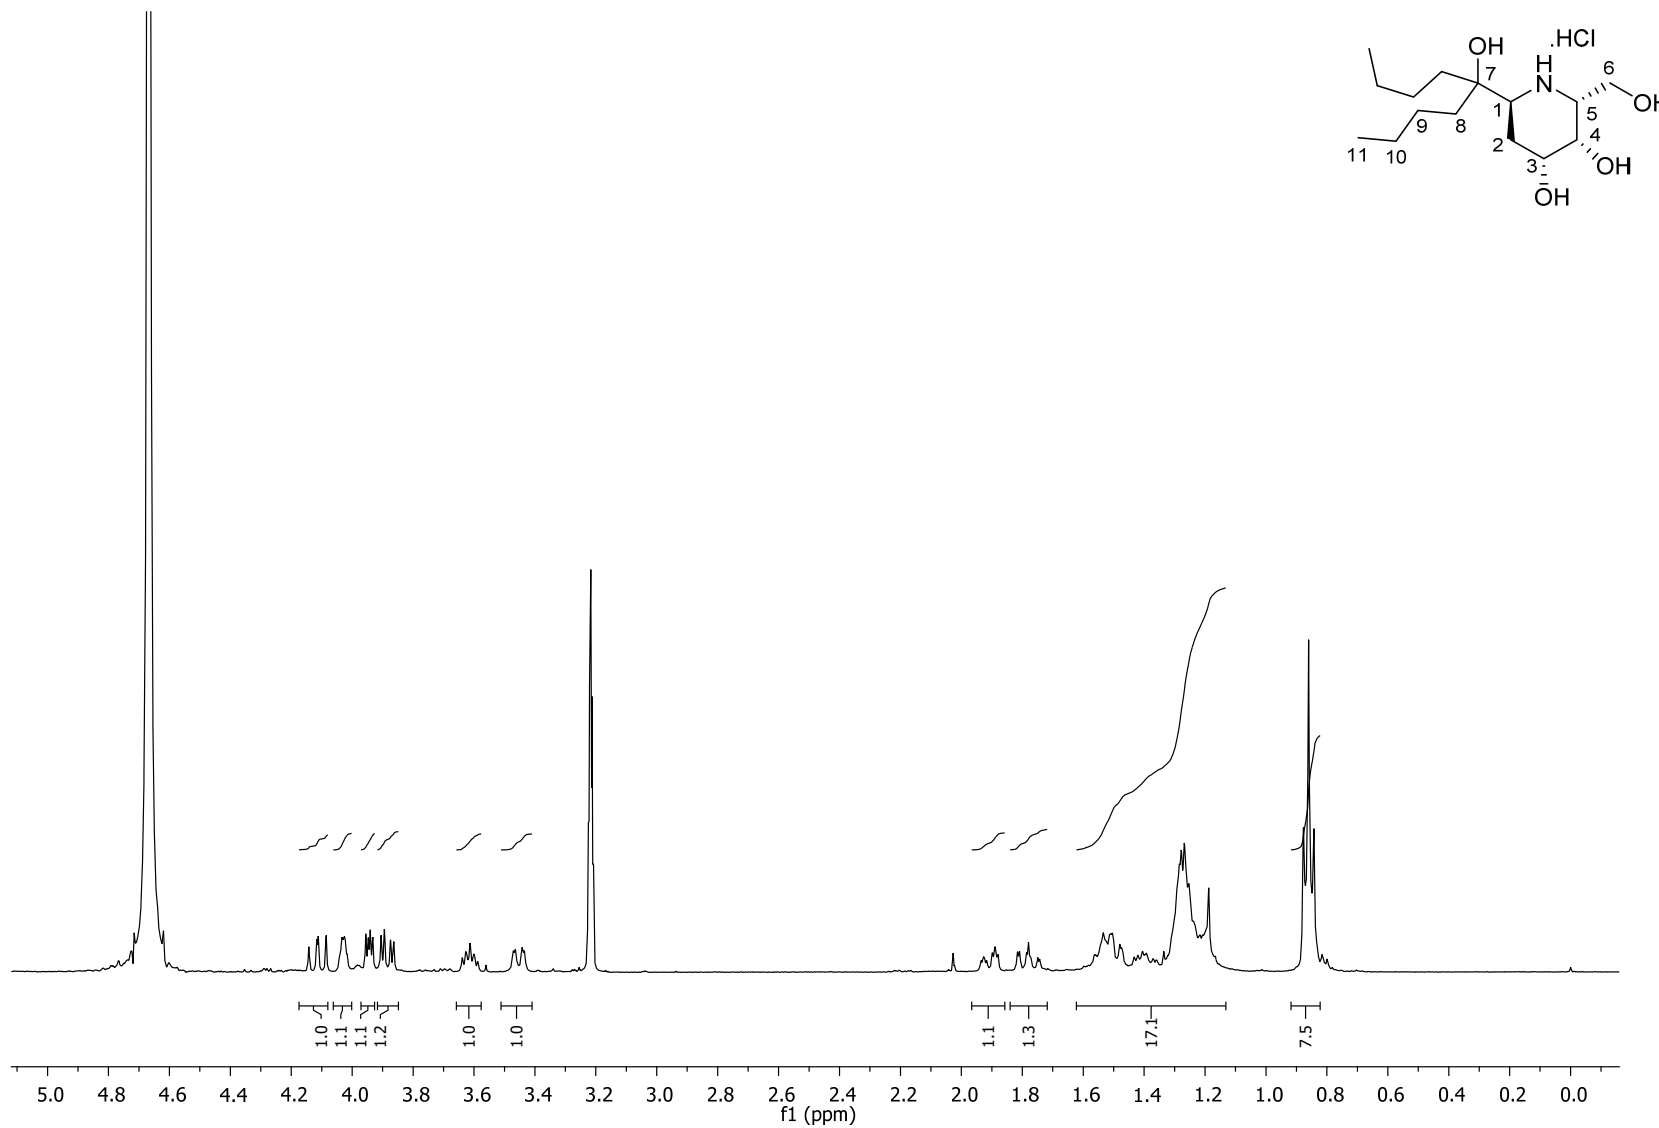

$^{13}\text{C}$  NMR of compound **24** (100 MHz,  $\text{CH}_3\text{OD}$ , 300K)

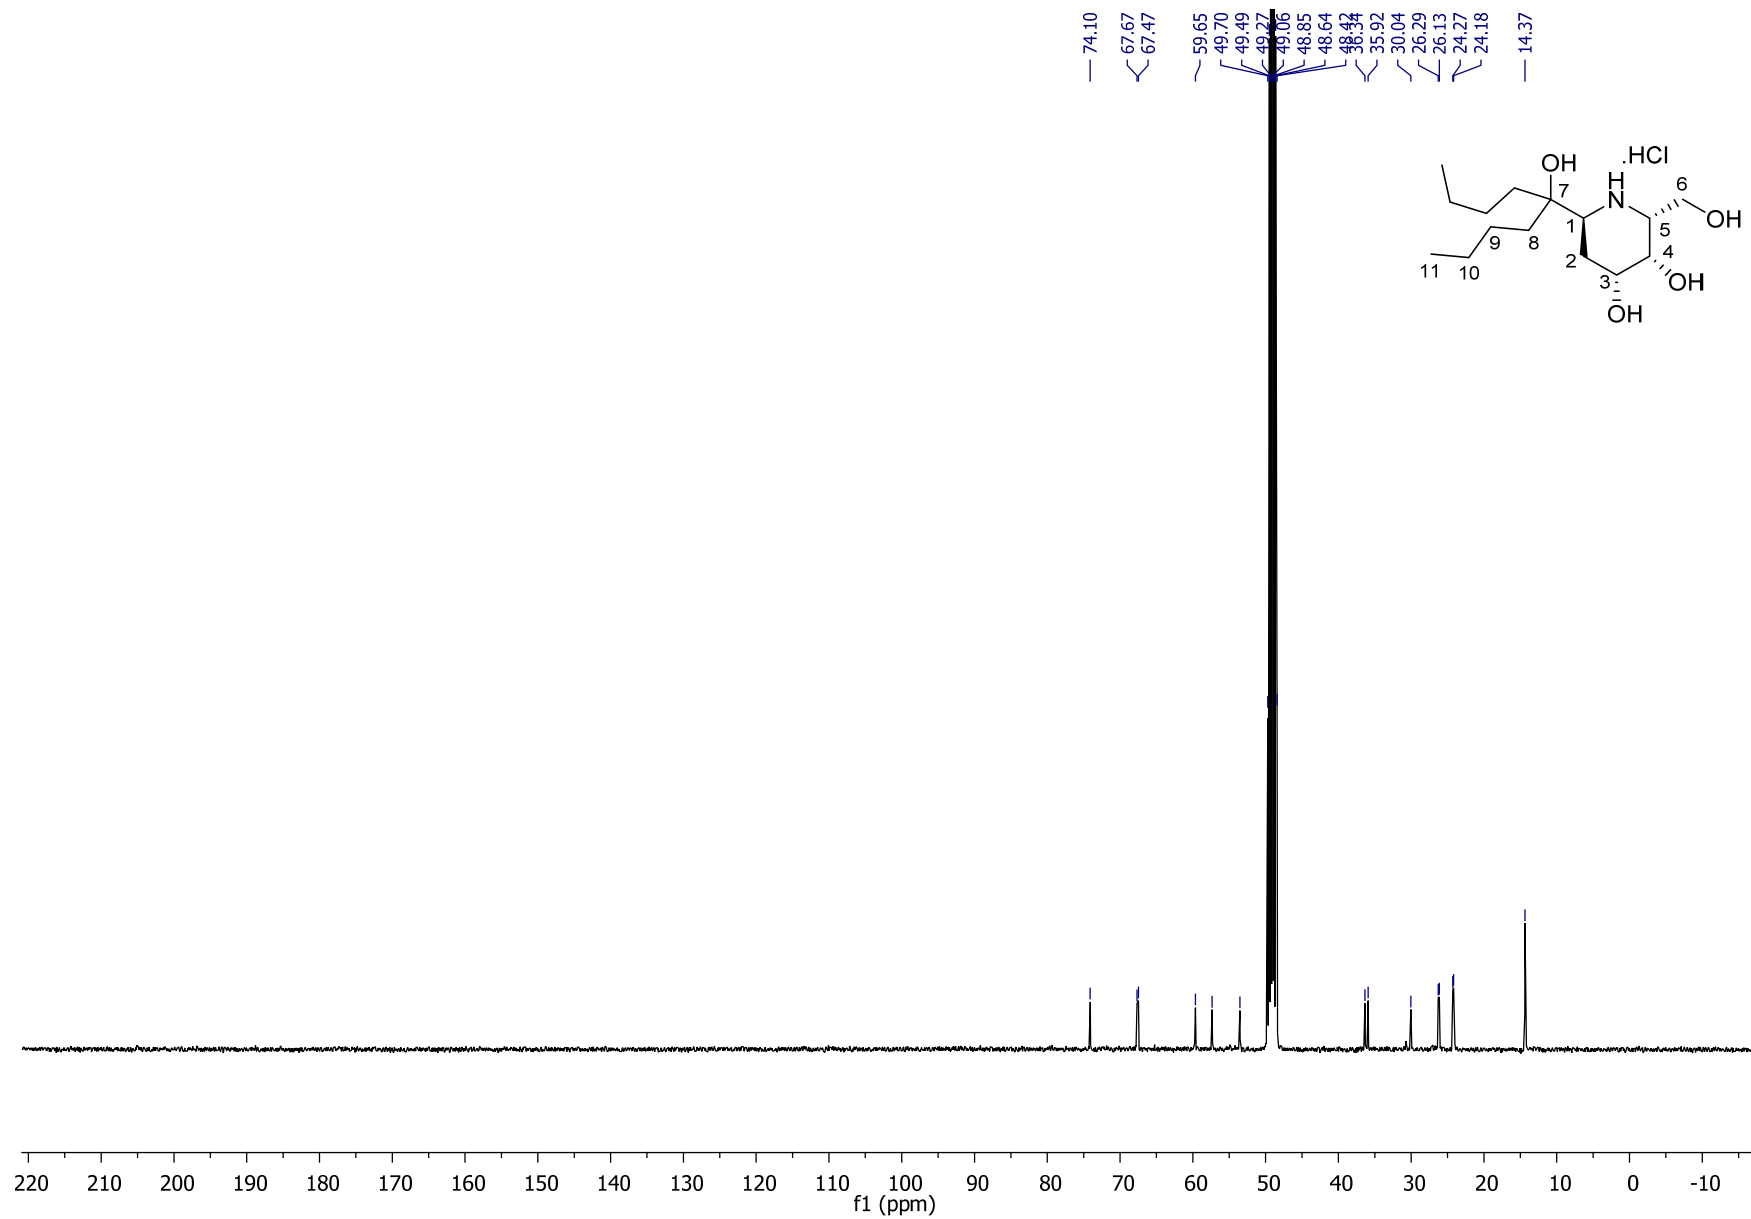

$^1\text{H}$  NMR of compound **25** (400 MHz,  $\text{CD}_3\text{OD}$ , 300K)

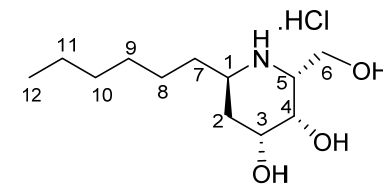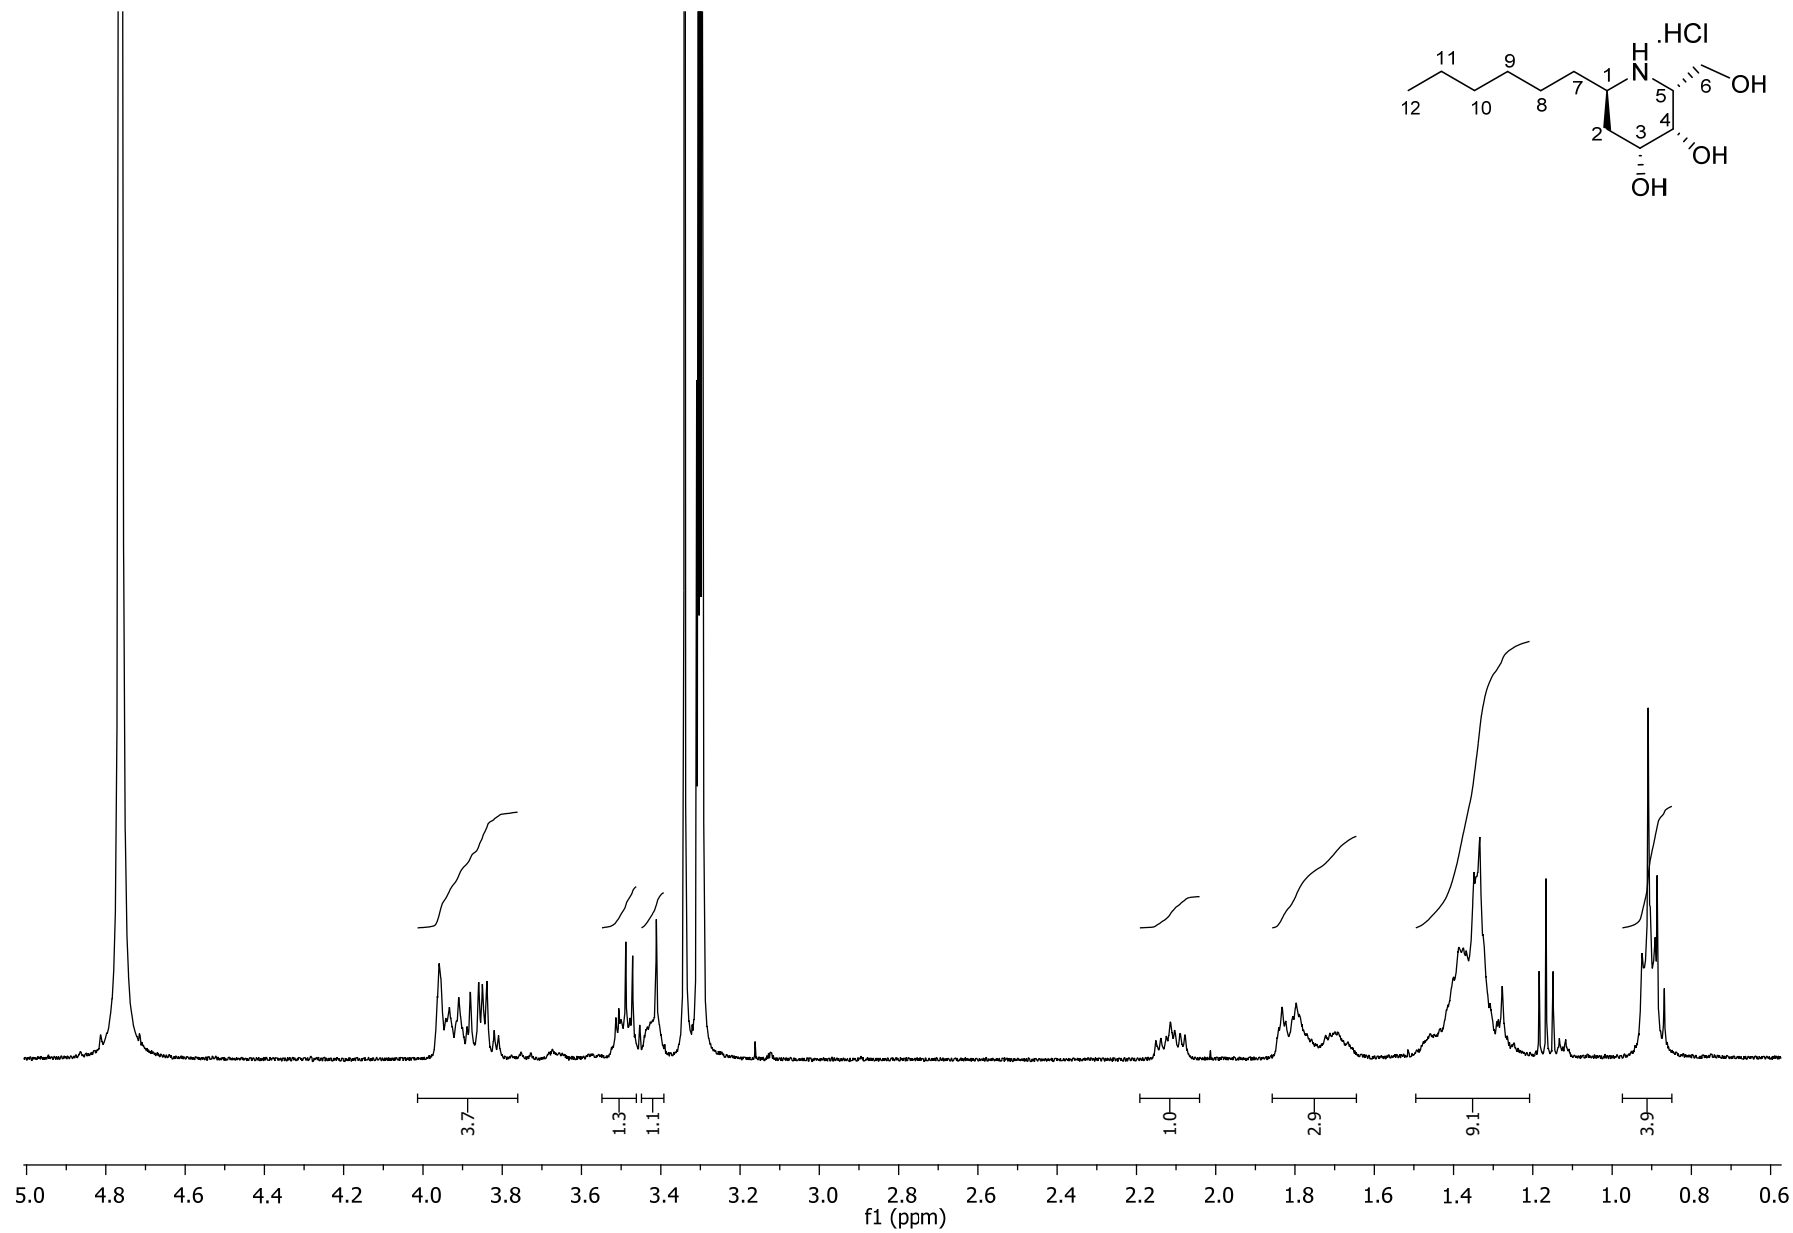

$^{13}\text{C}$  NMR of compound **25** (100 MHz,  $\text{CD}_3\text{OD}$ , 300K)

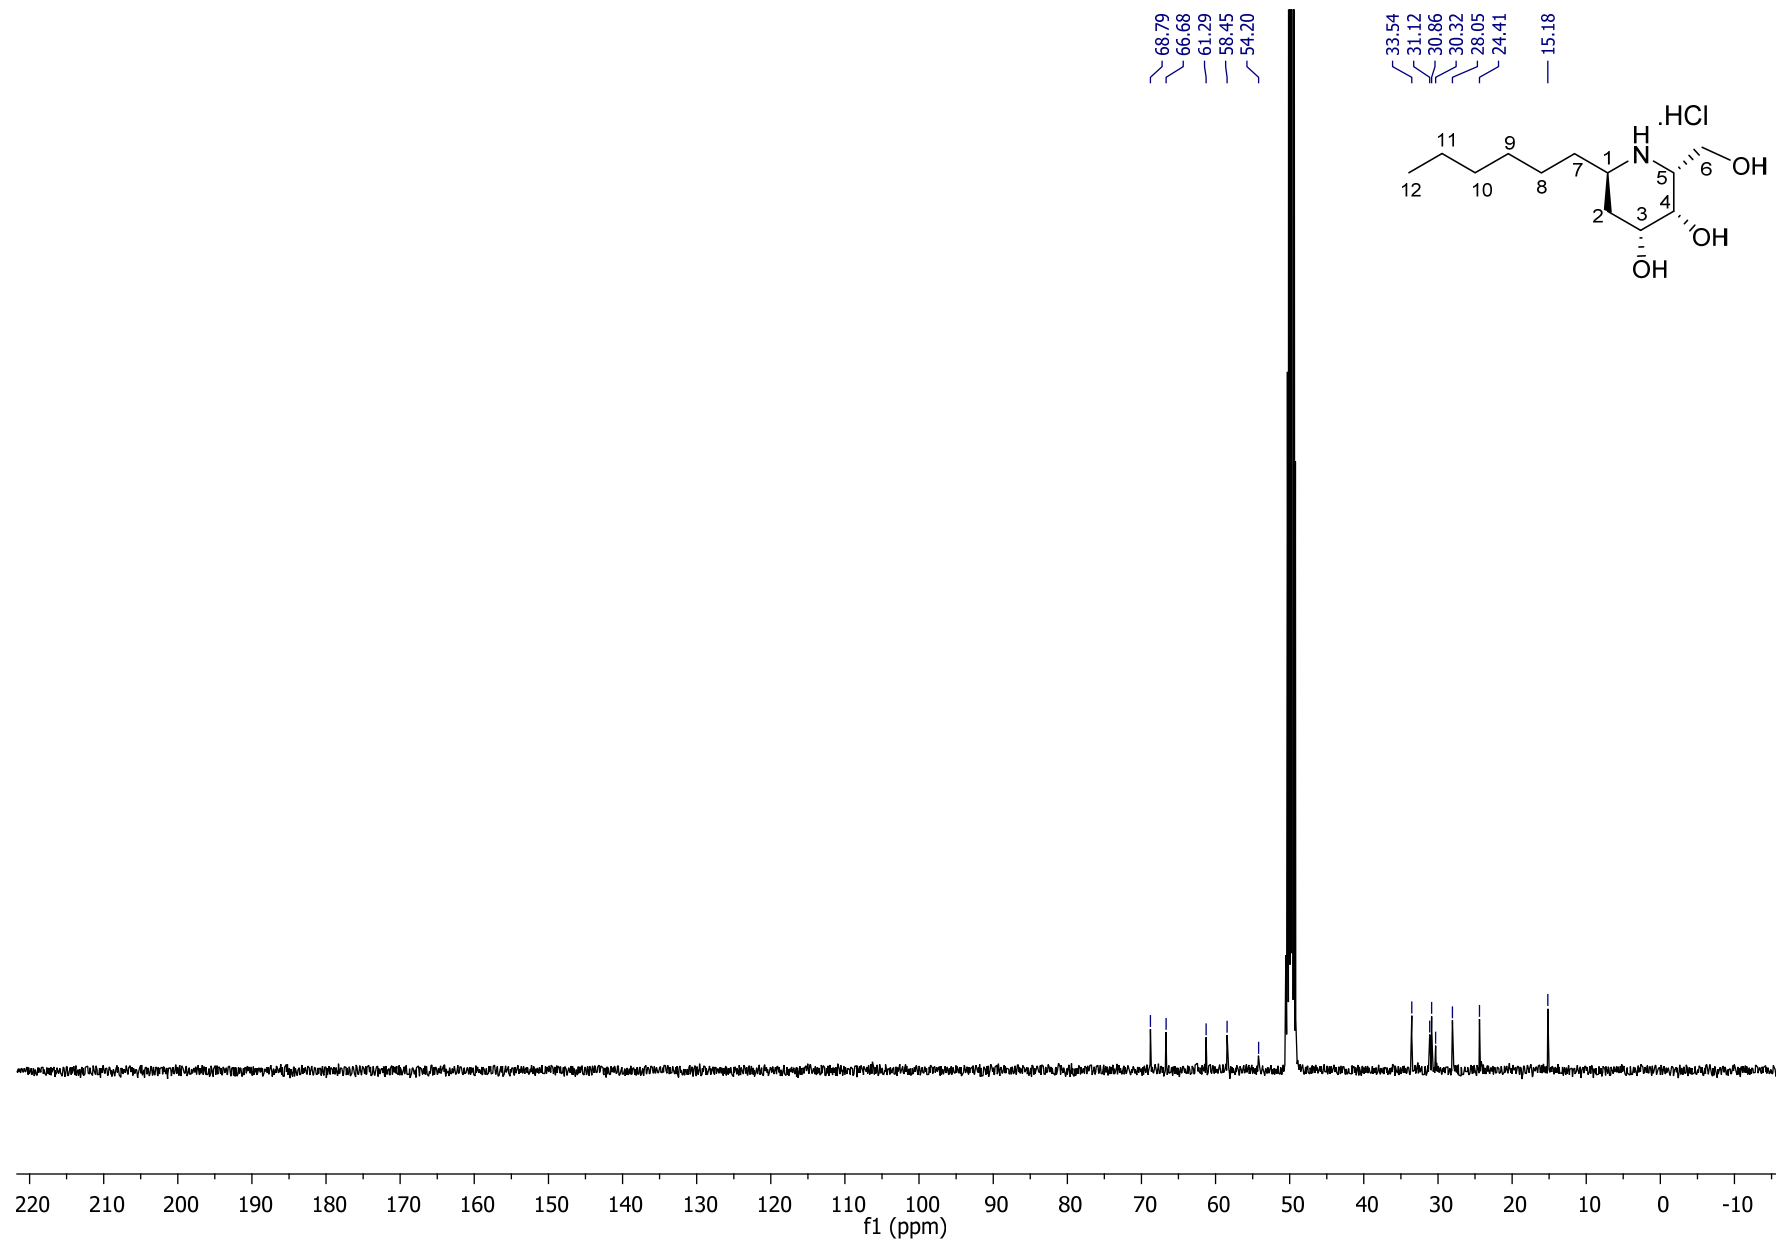

$^1\text{H}$  NMR of compound **26** (300 MHz,  $\text{CD}_3\text{OD}$ , 300K)

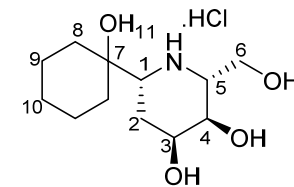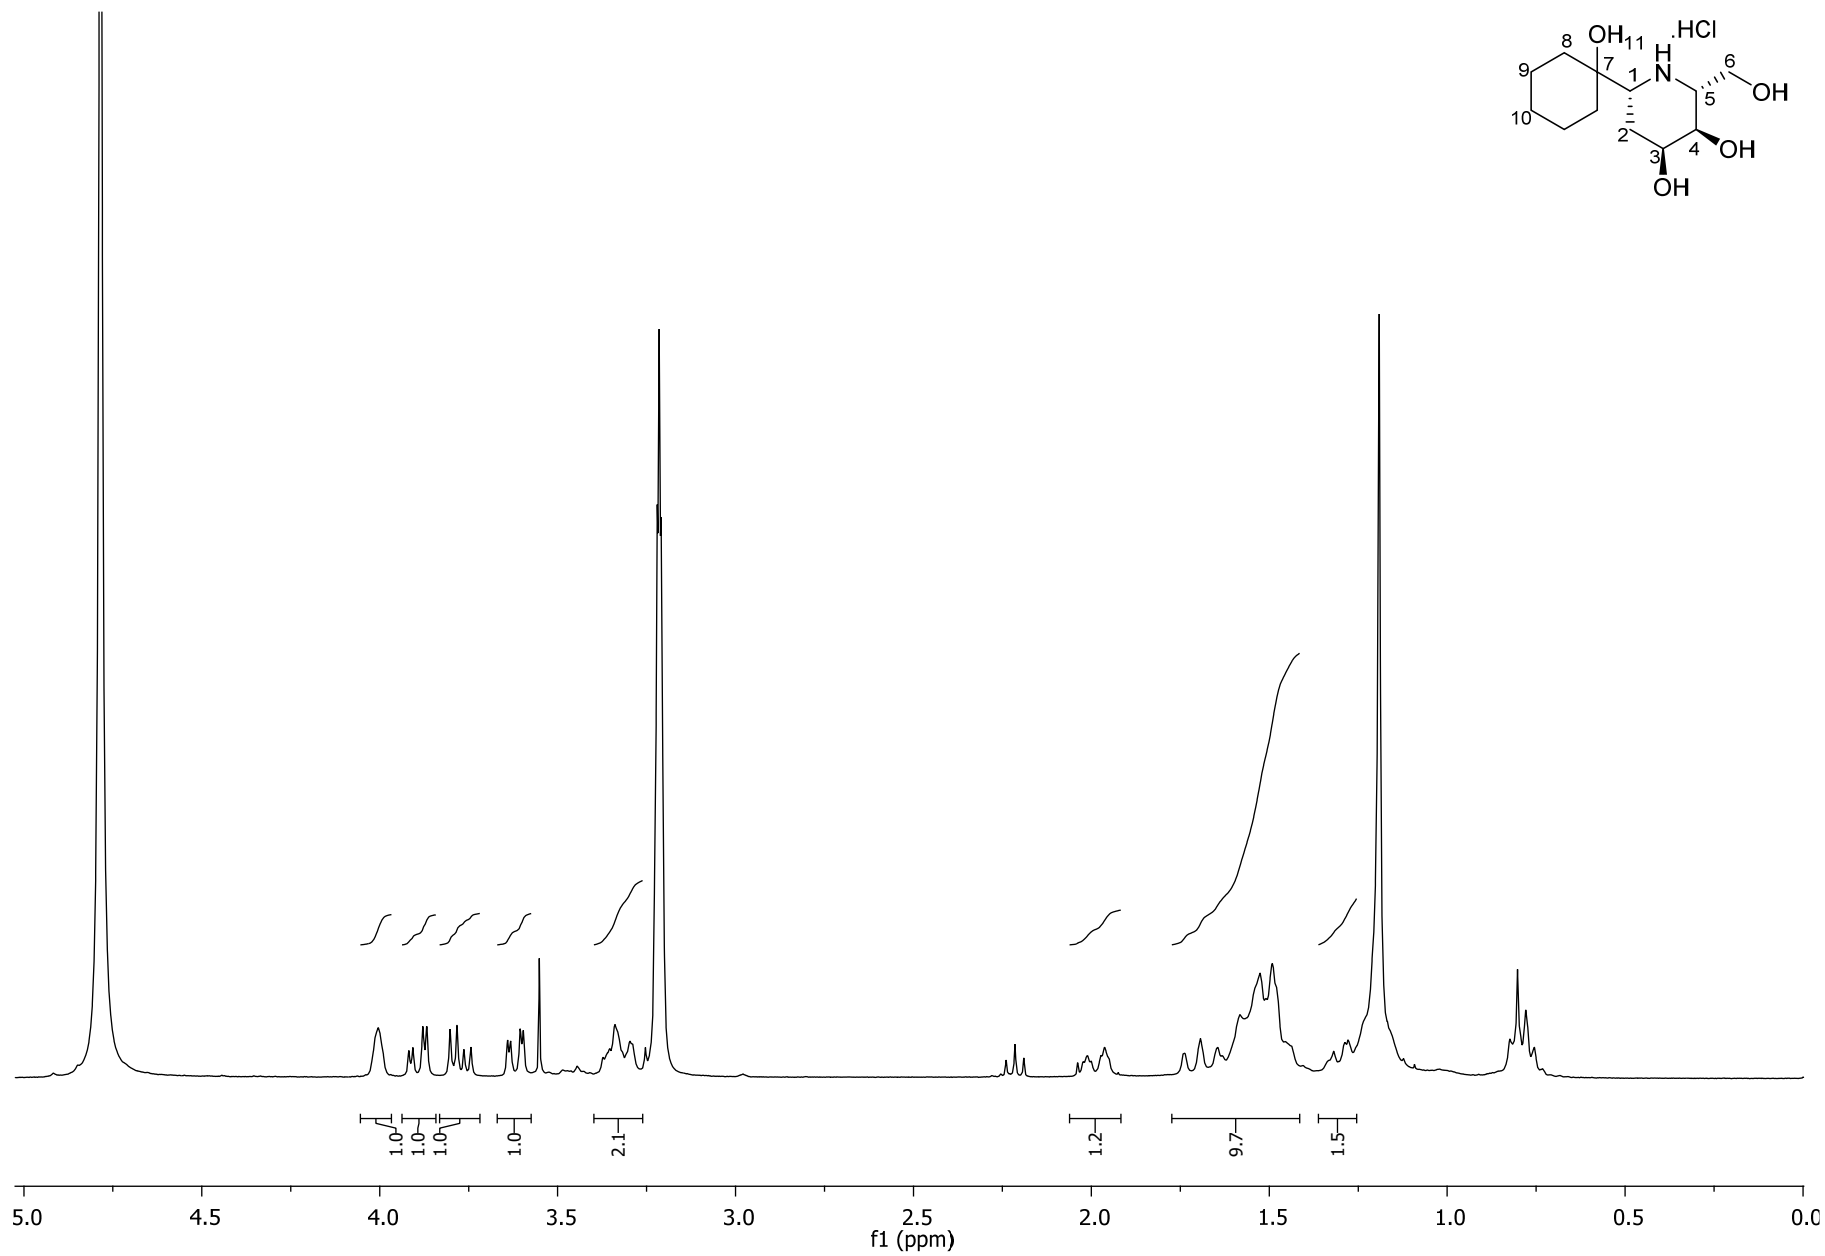



$^{13}\text{C}$  NMR of compound **26** (75 MHz,  $\text{CD}_3\text{OD}$ , 300K)

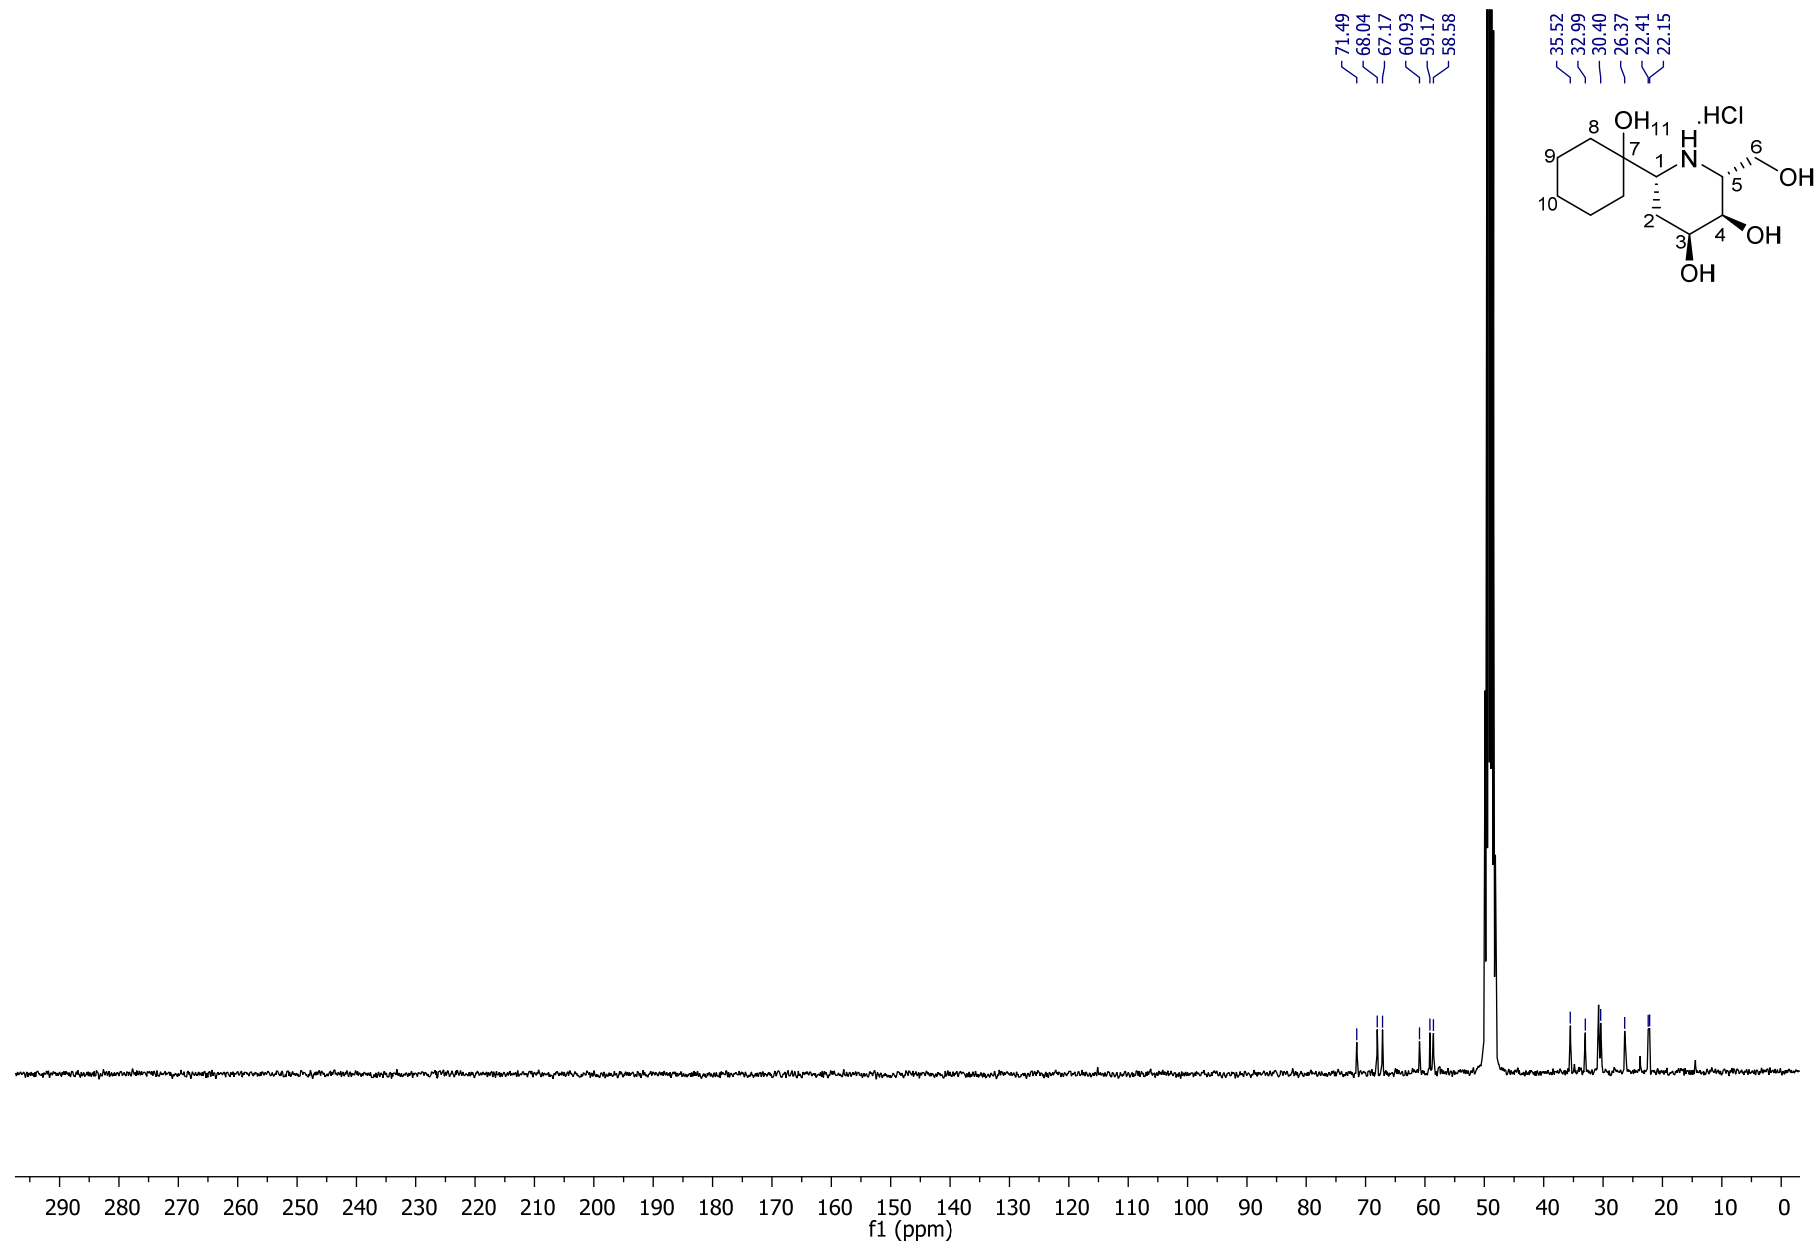

$^1\text{H}$  NMR of compound **27** (400MHz,  $\text{CD}_3\text{OD}$ , 300K)

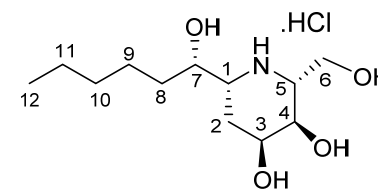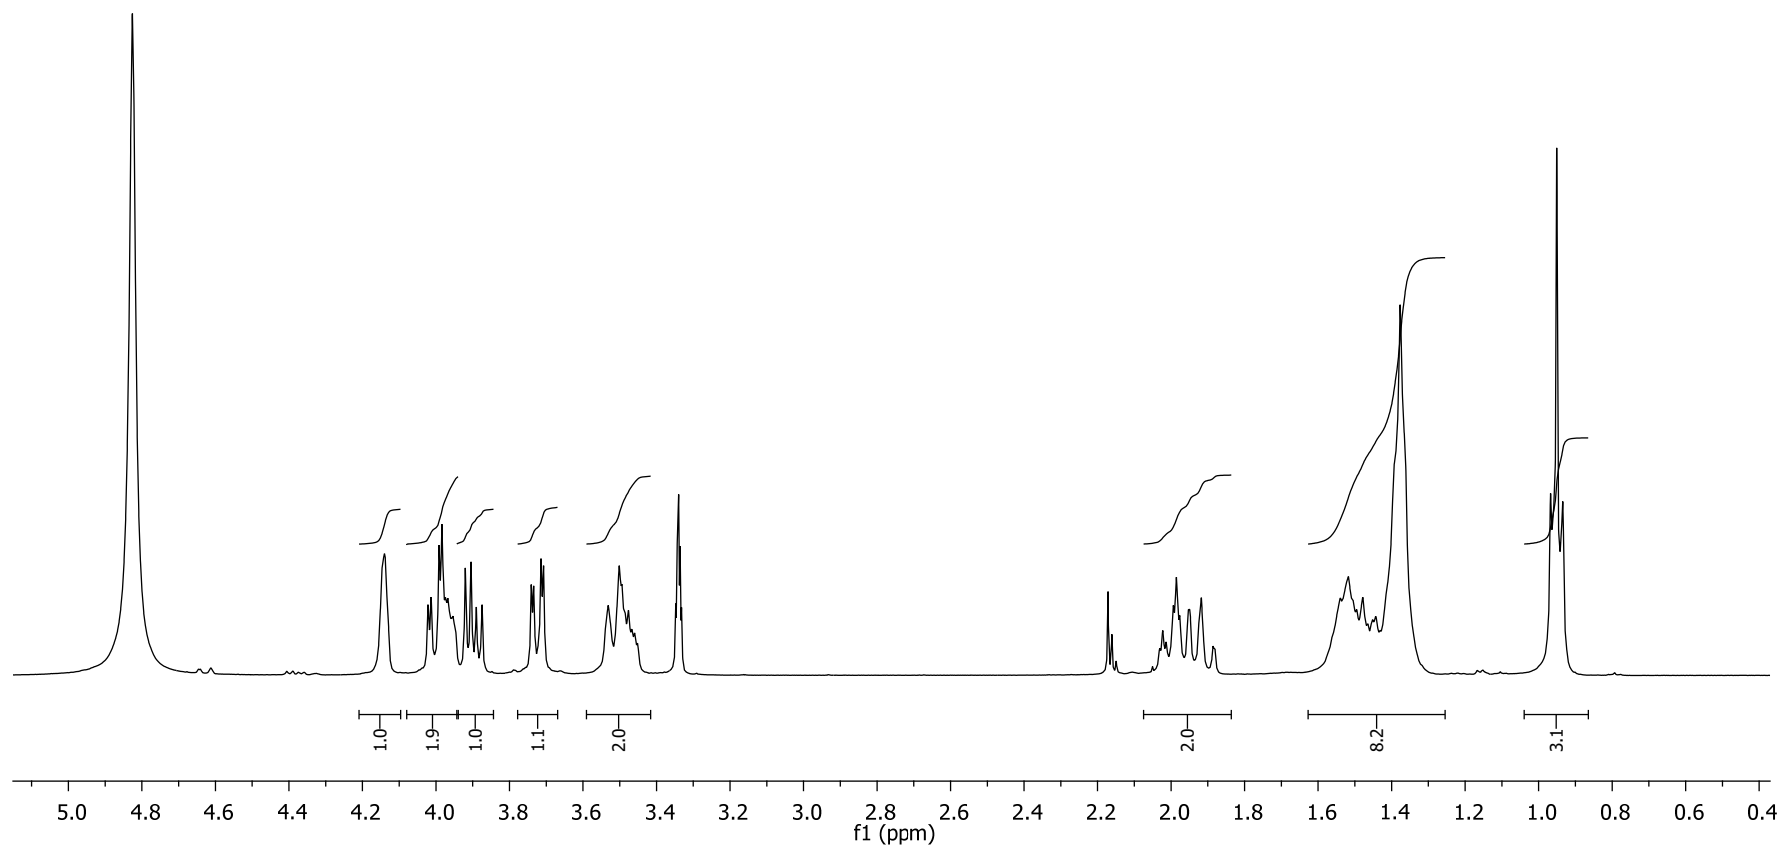

$^{13}\text{C}$  NMR of compound **27** (100 MHz,  $\text{CD}_3\text{OD}$ , 300K)

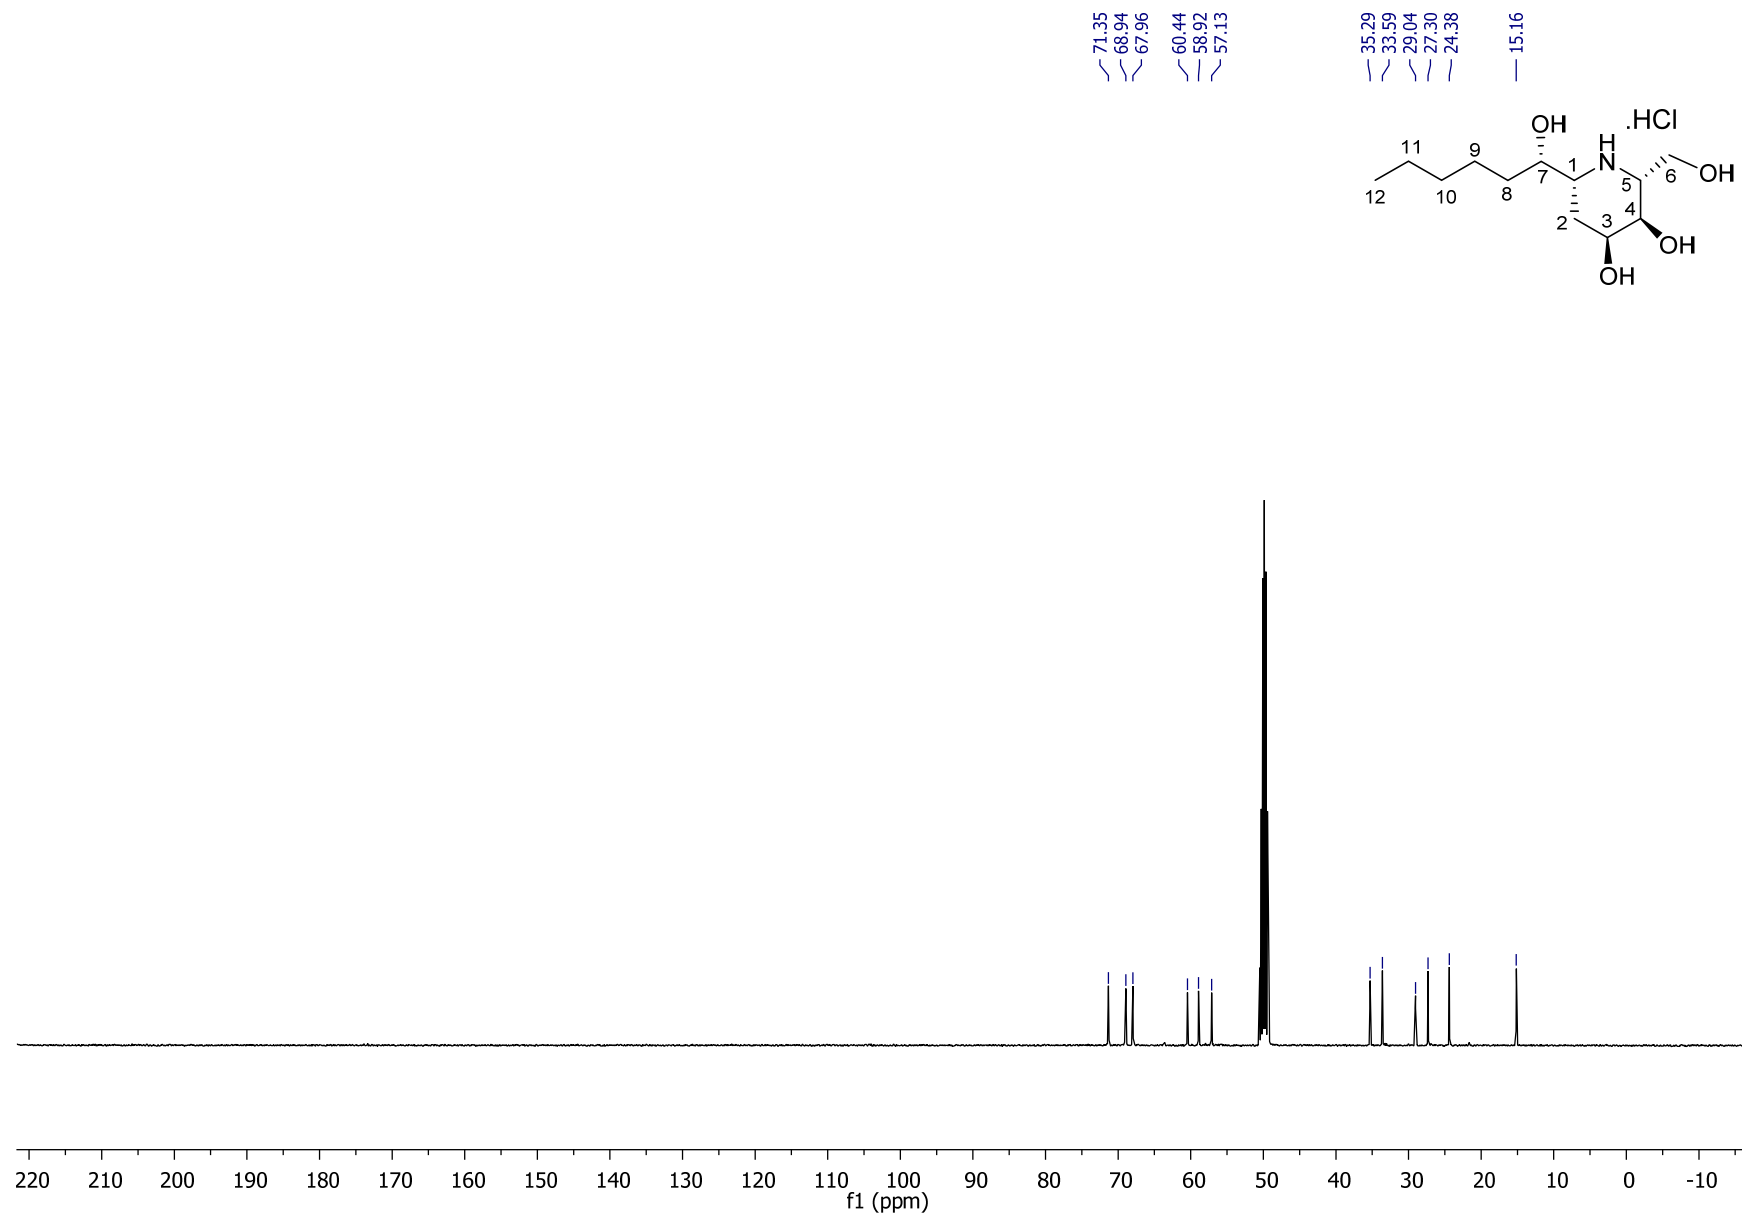

$^1\text{H}$  NMR of compound **28** (400MHz,  $\text{CD}_3\text{OD}$ , 300K)

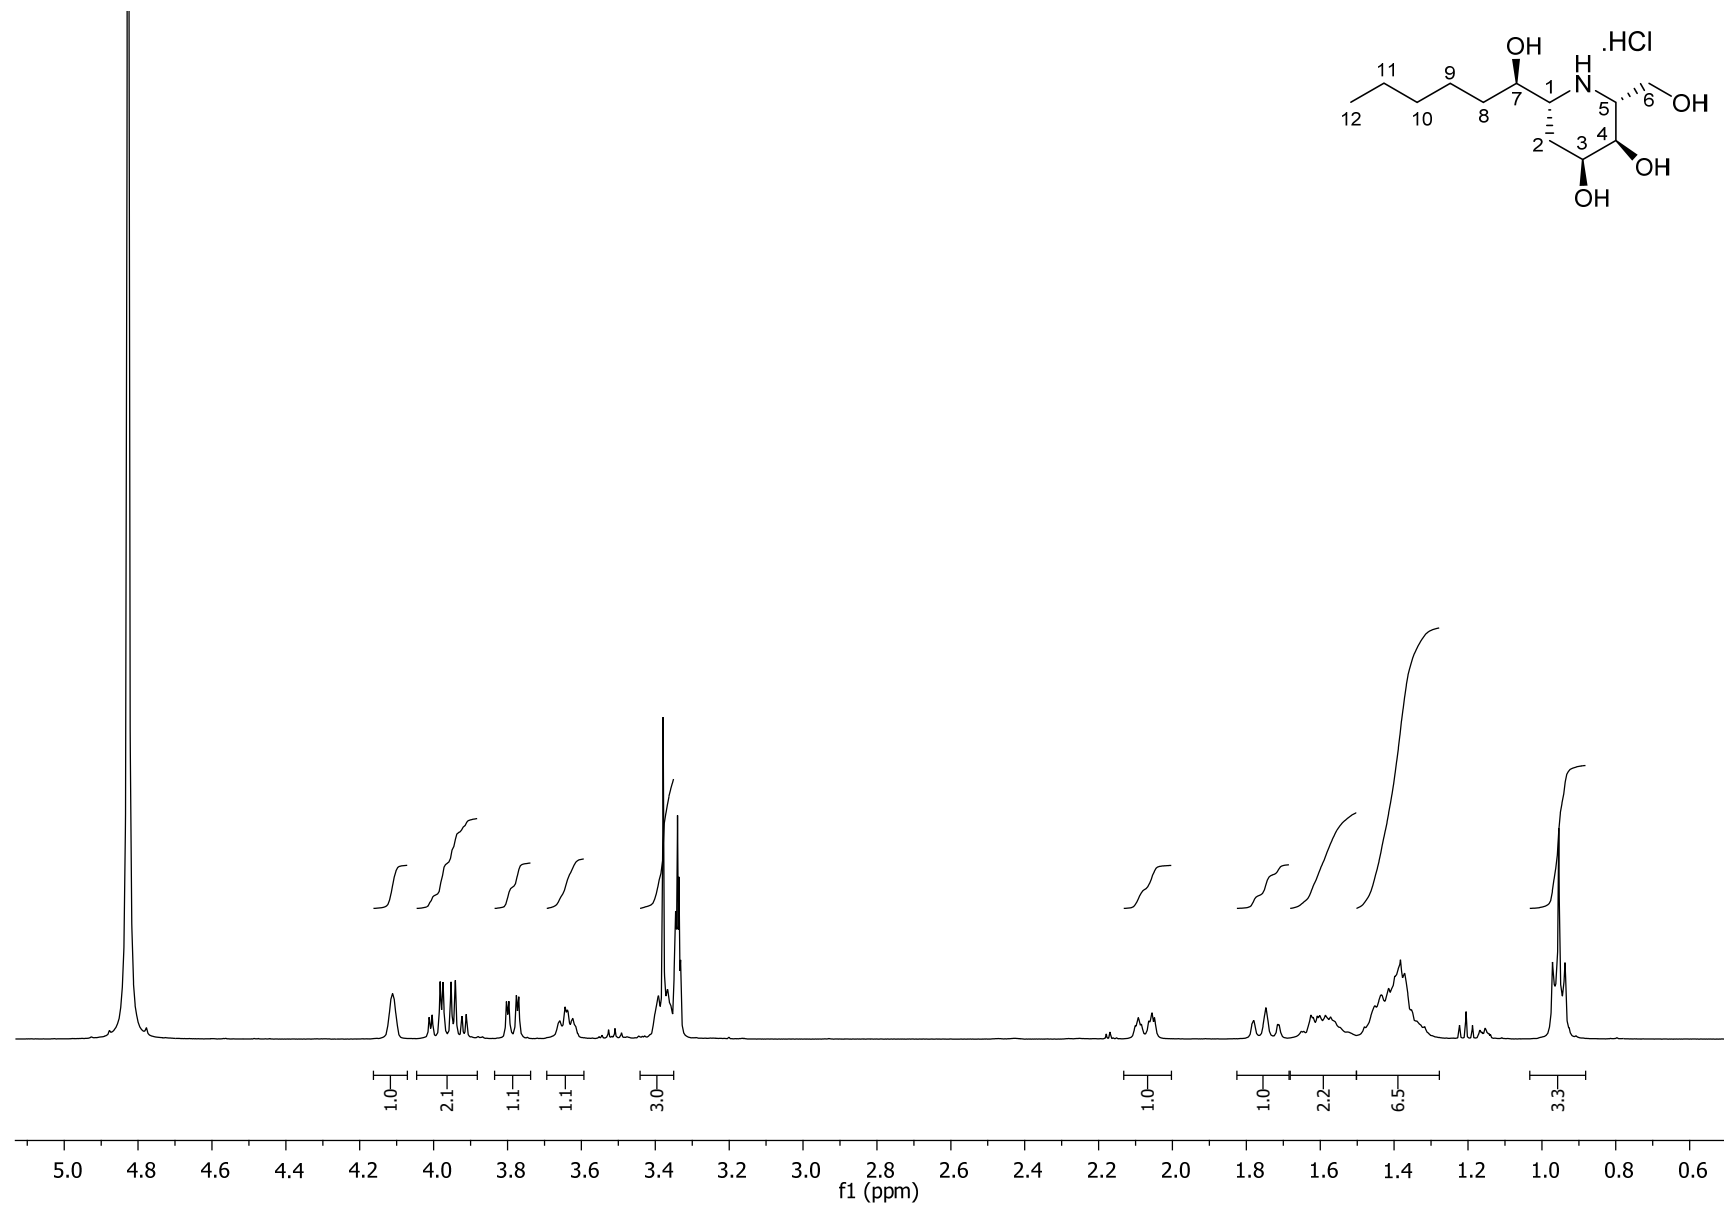

$^{13}\text{C}$  NMR of compound **28** (100 MHz,  $\text{CD}_3\text{OD}$ , 300K)

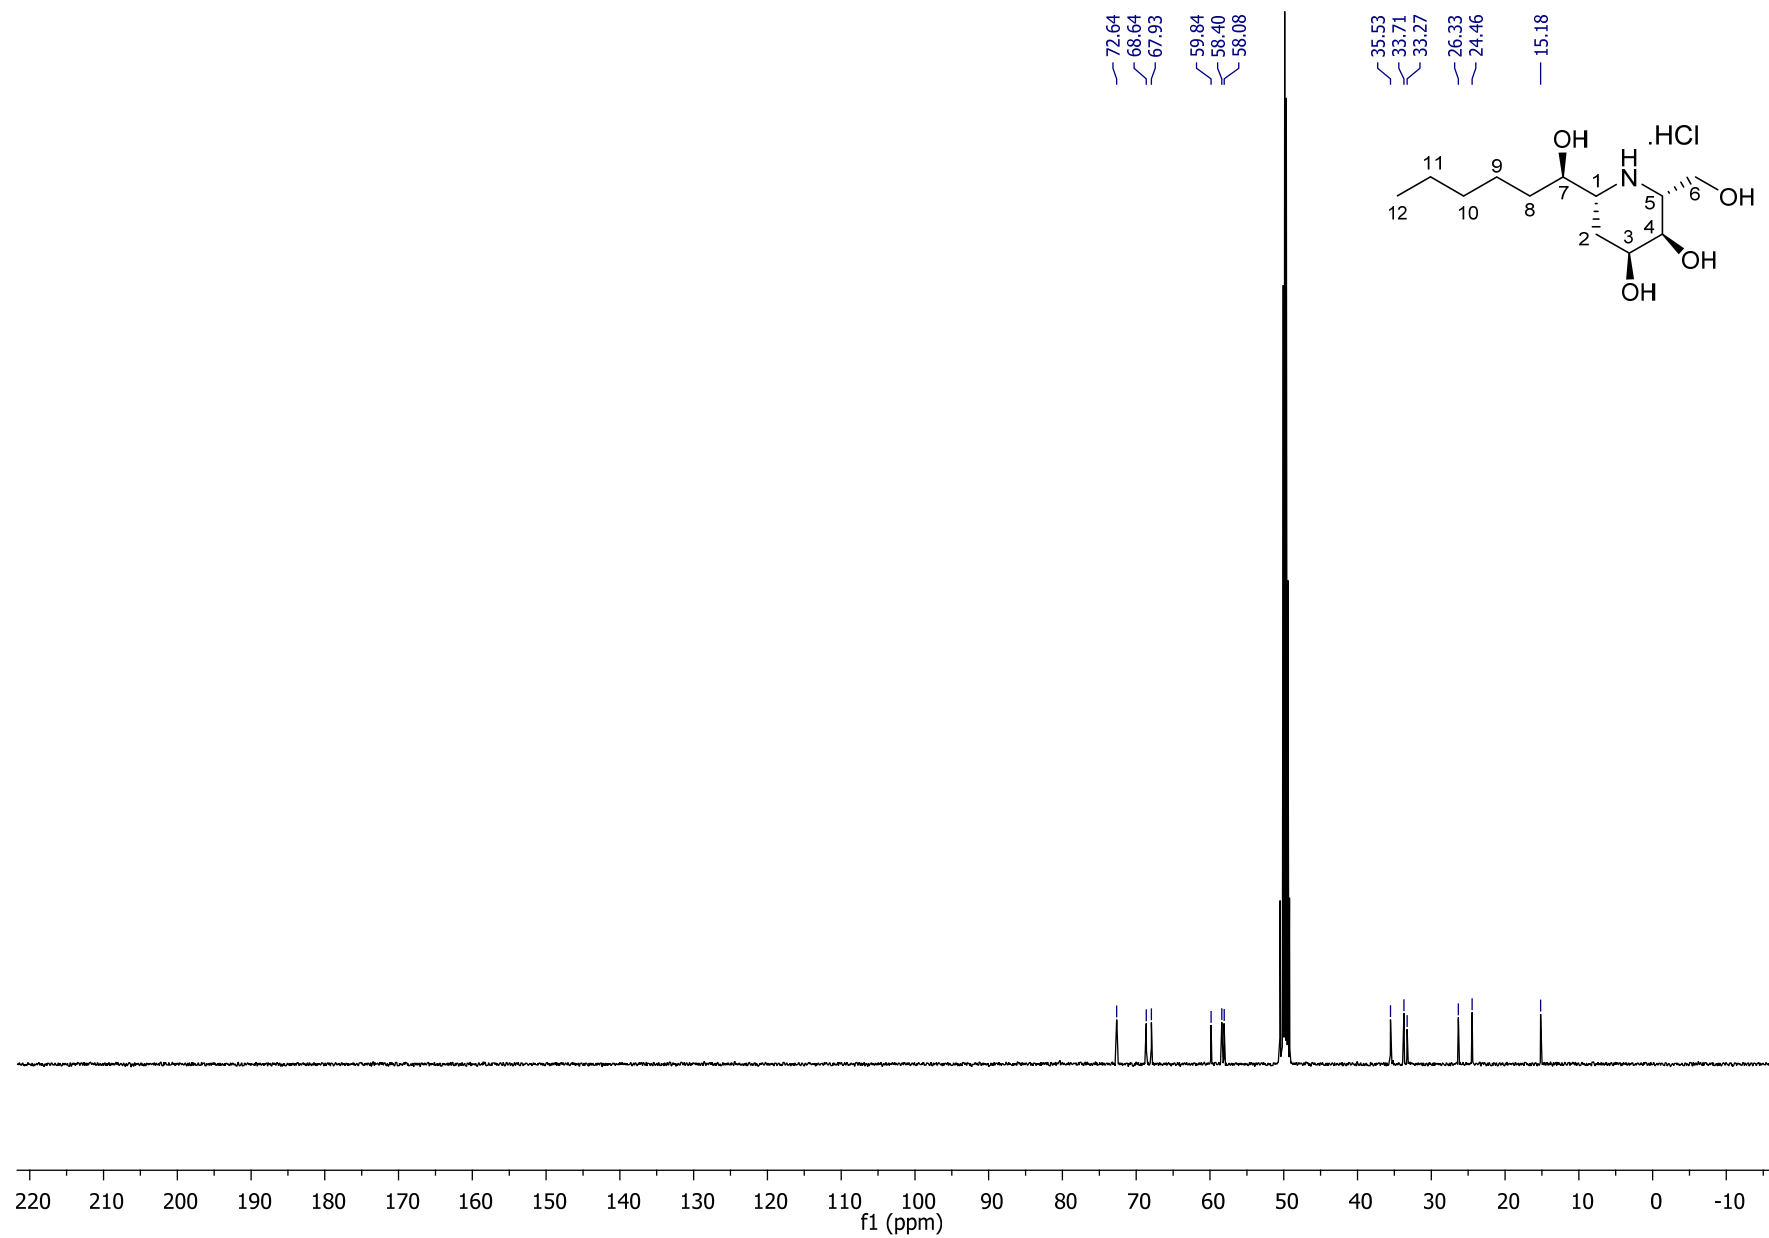

$^1\text{H}$  NMR of compound **29** (400 MHz,  $\text{CD}_3\text{OD}$ , 300K)

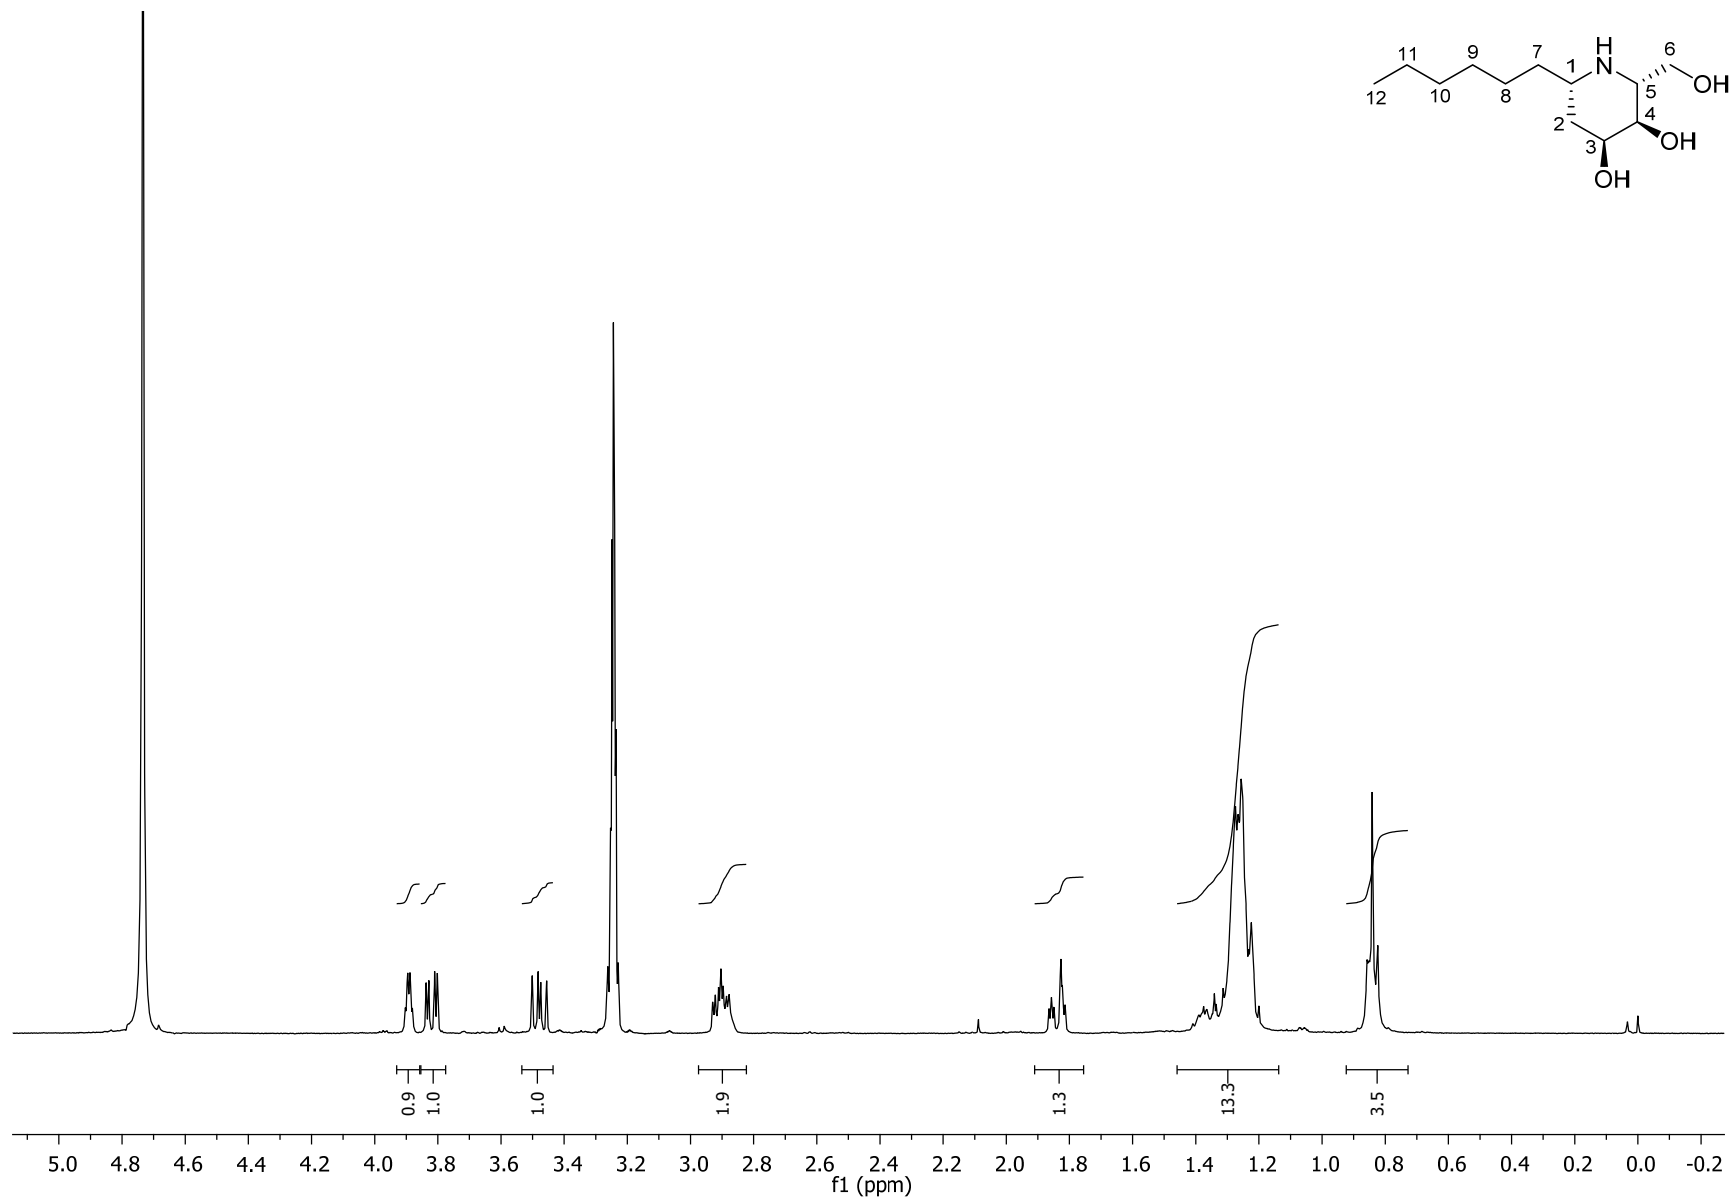

$^{13}\text{C}$  NMR of compound **29** (100 MHz,  $\text{CD}_3\text{OD}$ , 300K)

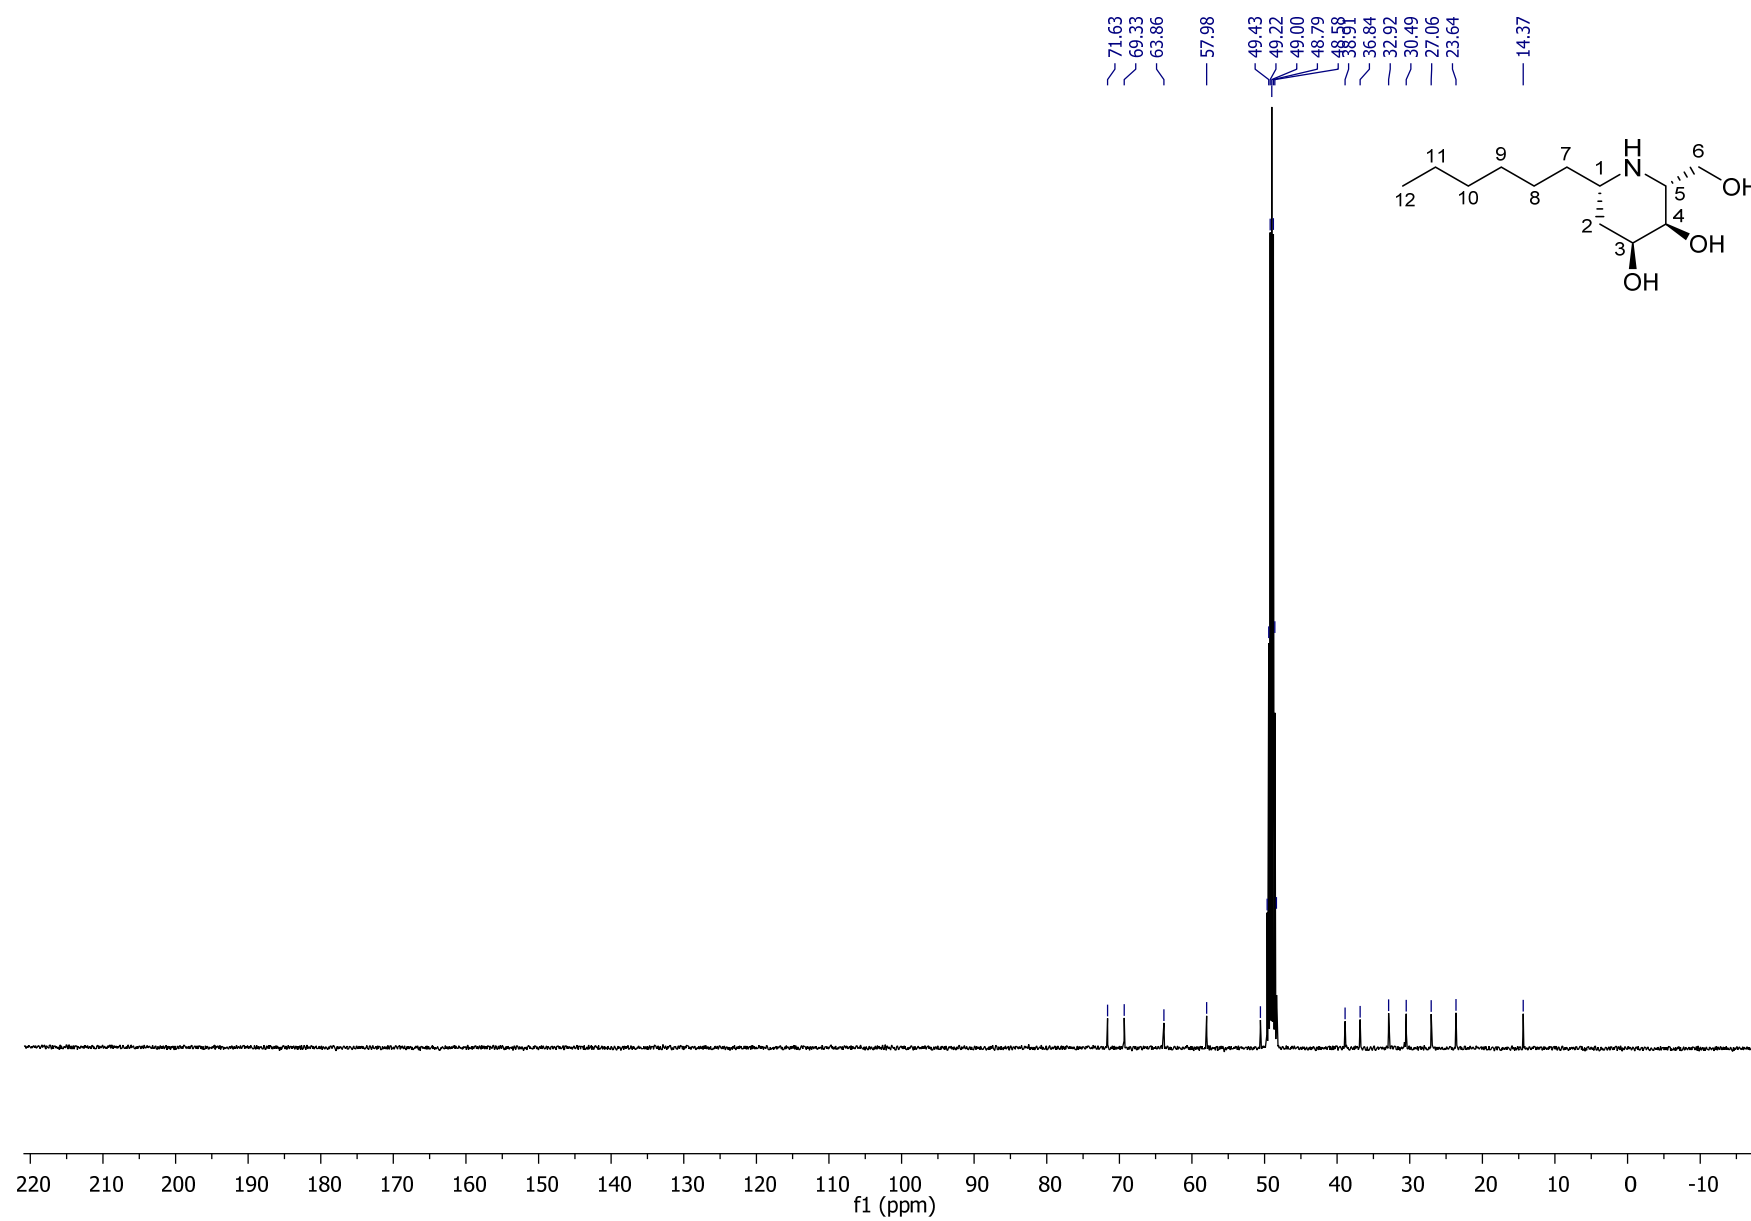

$^1\text{H}$  NMR of compound **30** (300 MHz,  $\text{CD}_3\text{OD}$ , 300K)

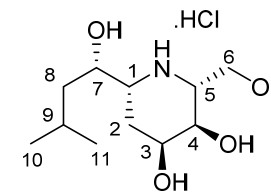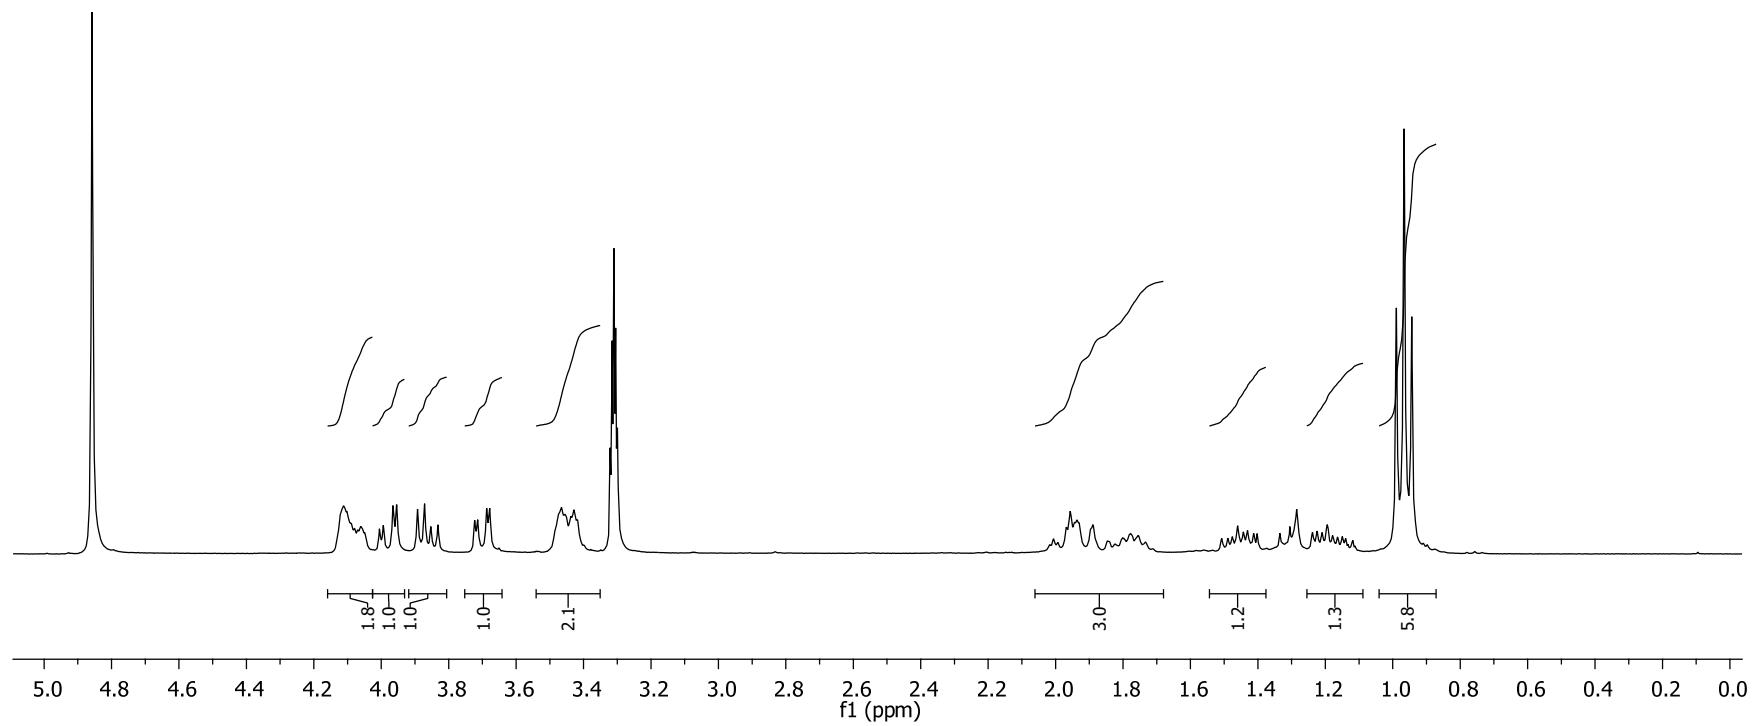



$^{13}\text{C}$  NMR of compound **30** (75 MHz,  $\text{CD}_3\text{OD}$ , 300K)

68.44  
68.04  
67.13  
49.85  
49.57  
49.28  
49.00  
48.72  
48.43  
48.15  
48.30  
25.50  
23.64  
22.26

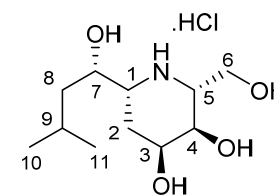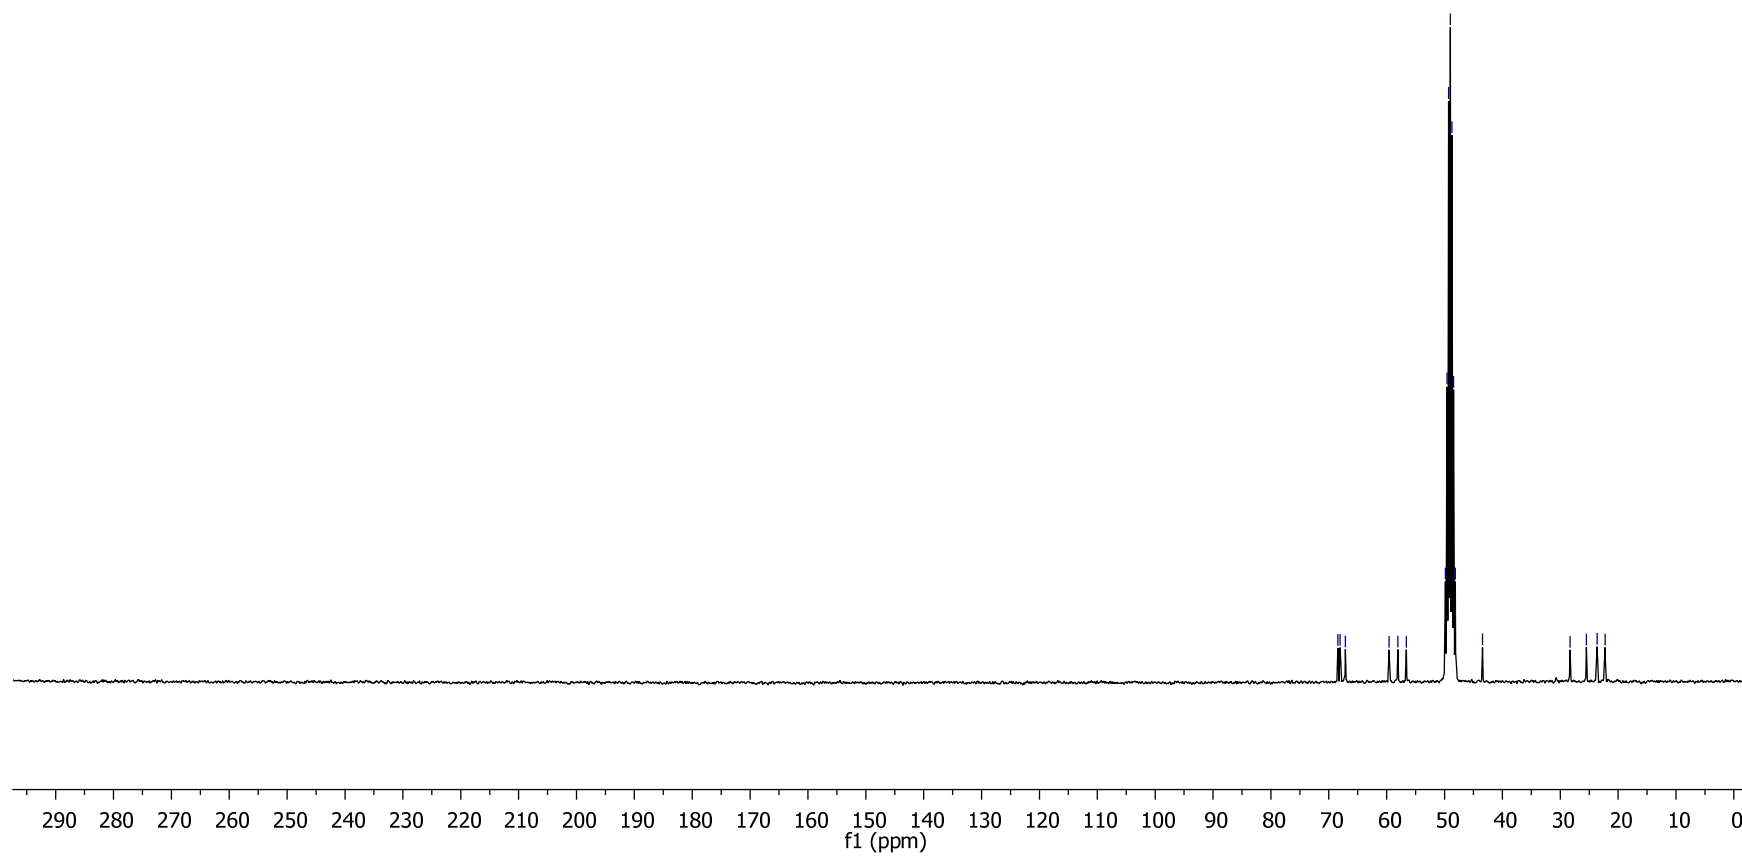

$^1\text{H}$  NMR of compound **31** (400 MHz,  $\text{CD}_3\text{OD}$ , 300K)

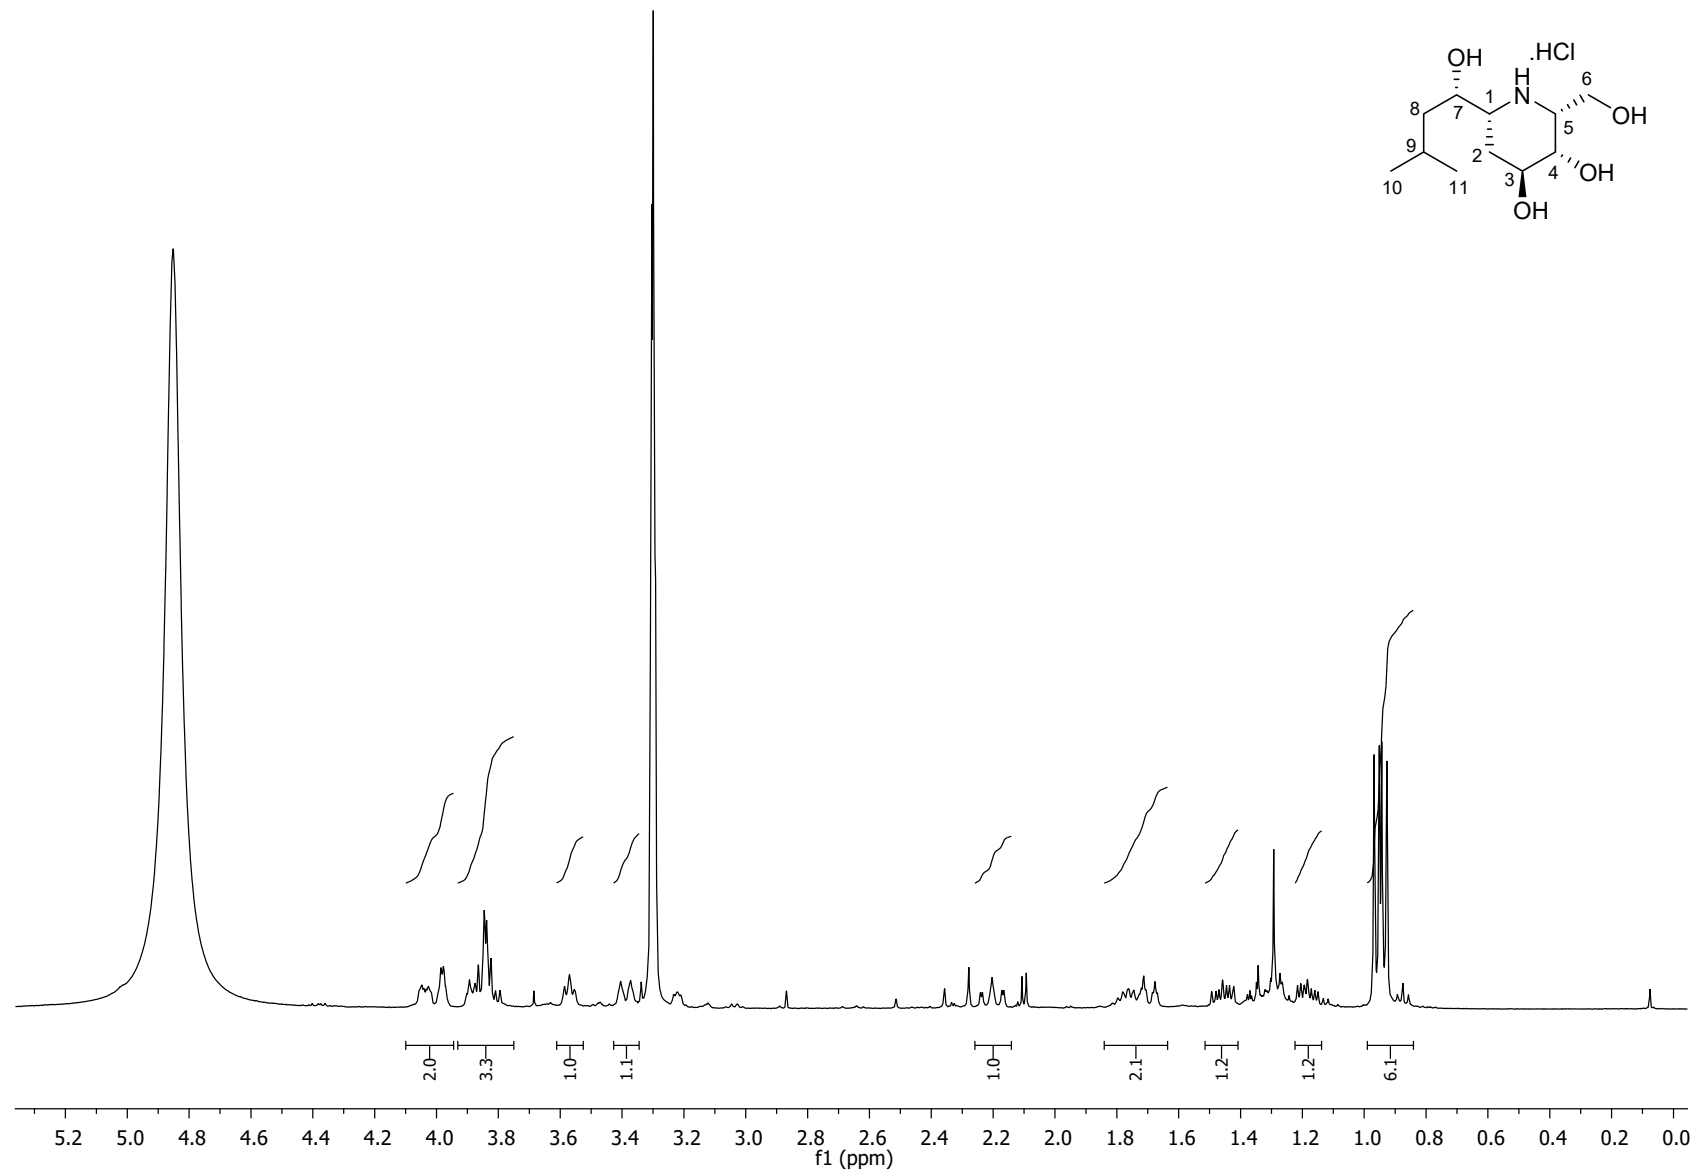

$^{13}\text{C}$  NMR of compound **31** (100 MHz,  $\text{CD}_3\text{OD}$ , 300K)

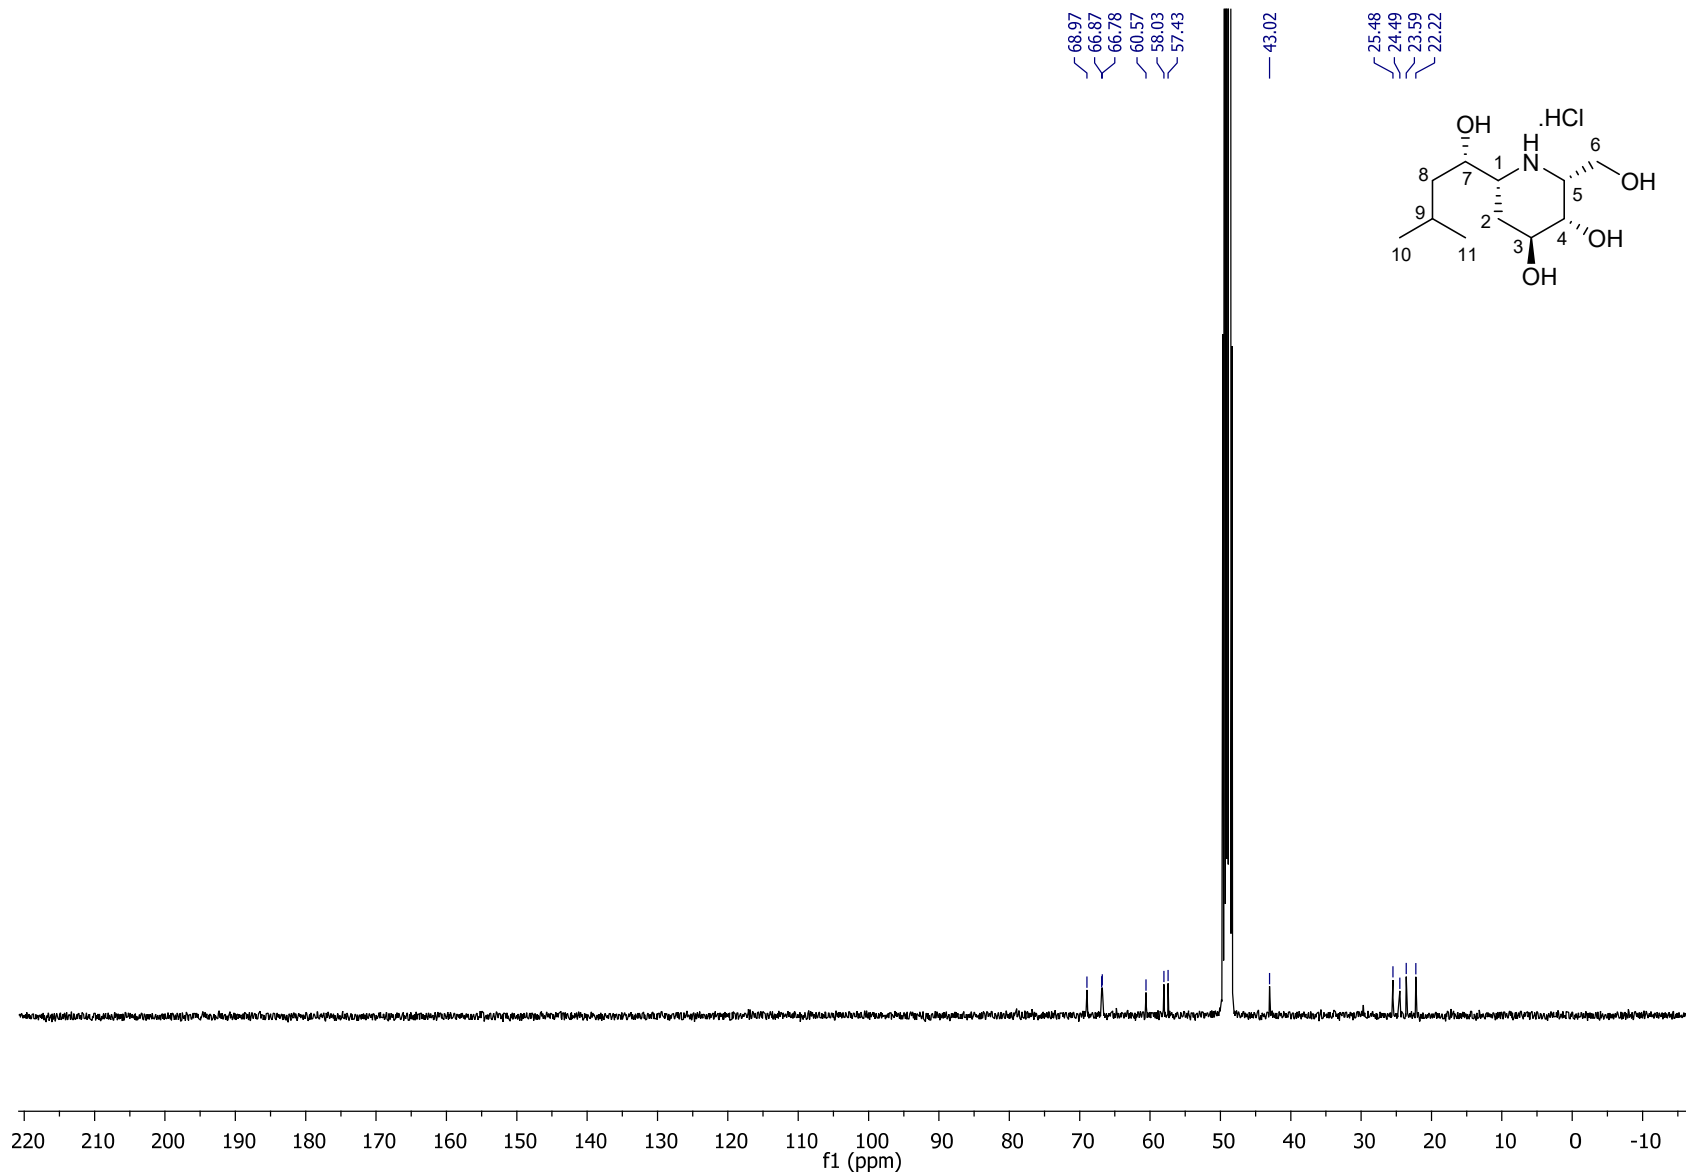

$^1\text{H}$  NMR of compound **32** (400 MHz,  $\text{CD}_3\text{OD}$ , 300K)

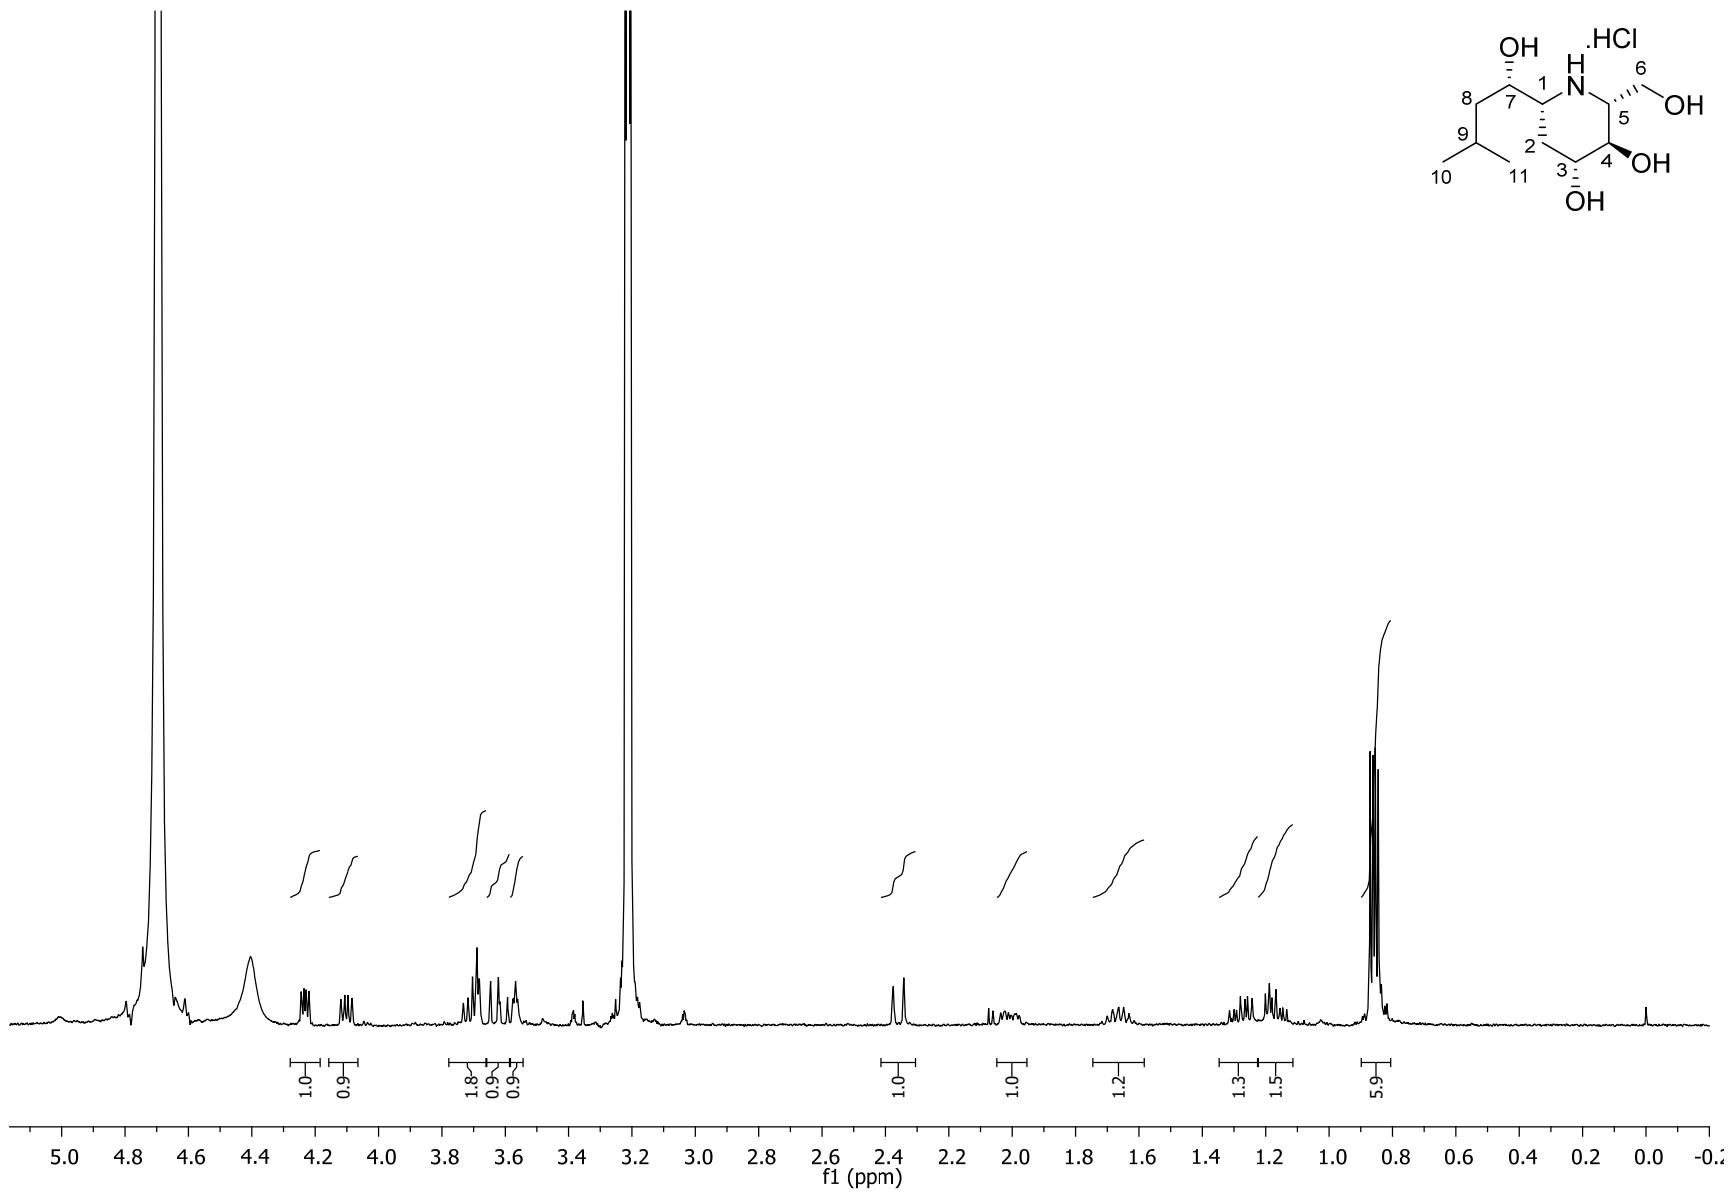

$^{13}\text{C}$  NMR of compound **32** (100 MHz,  $\text{CD}_3\text{OD}$ , 300K)

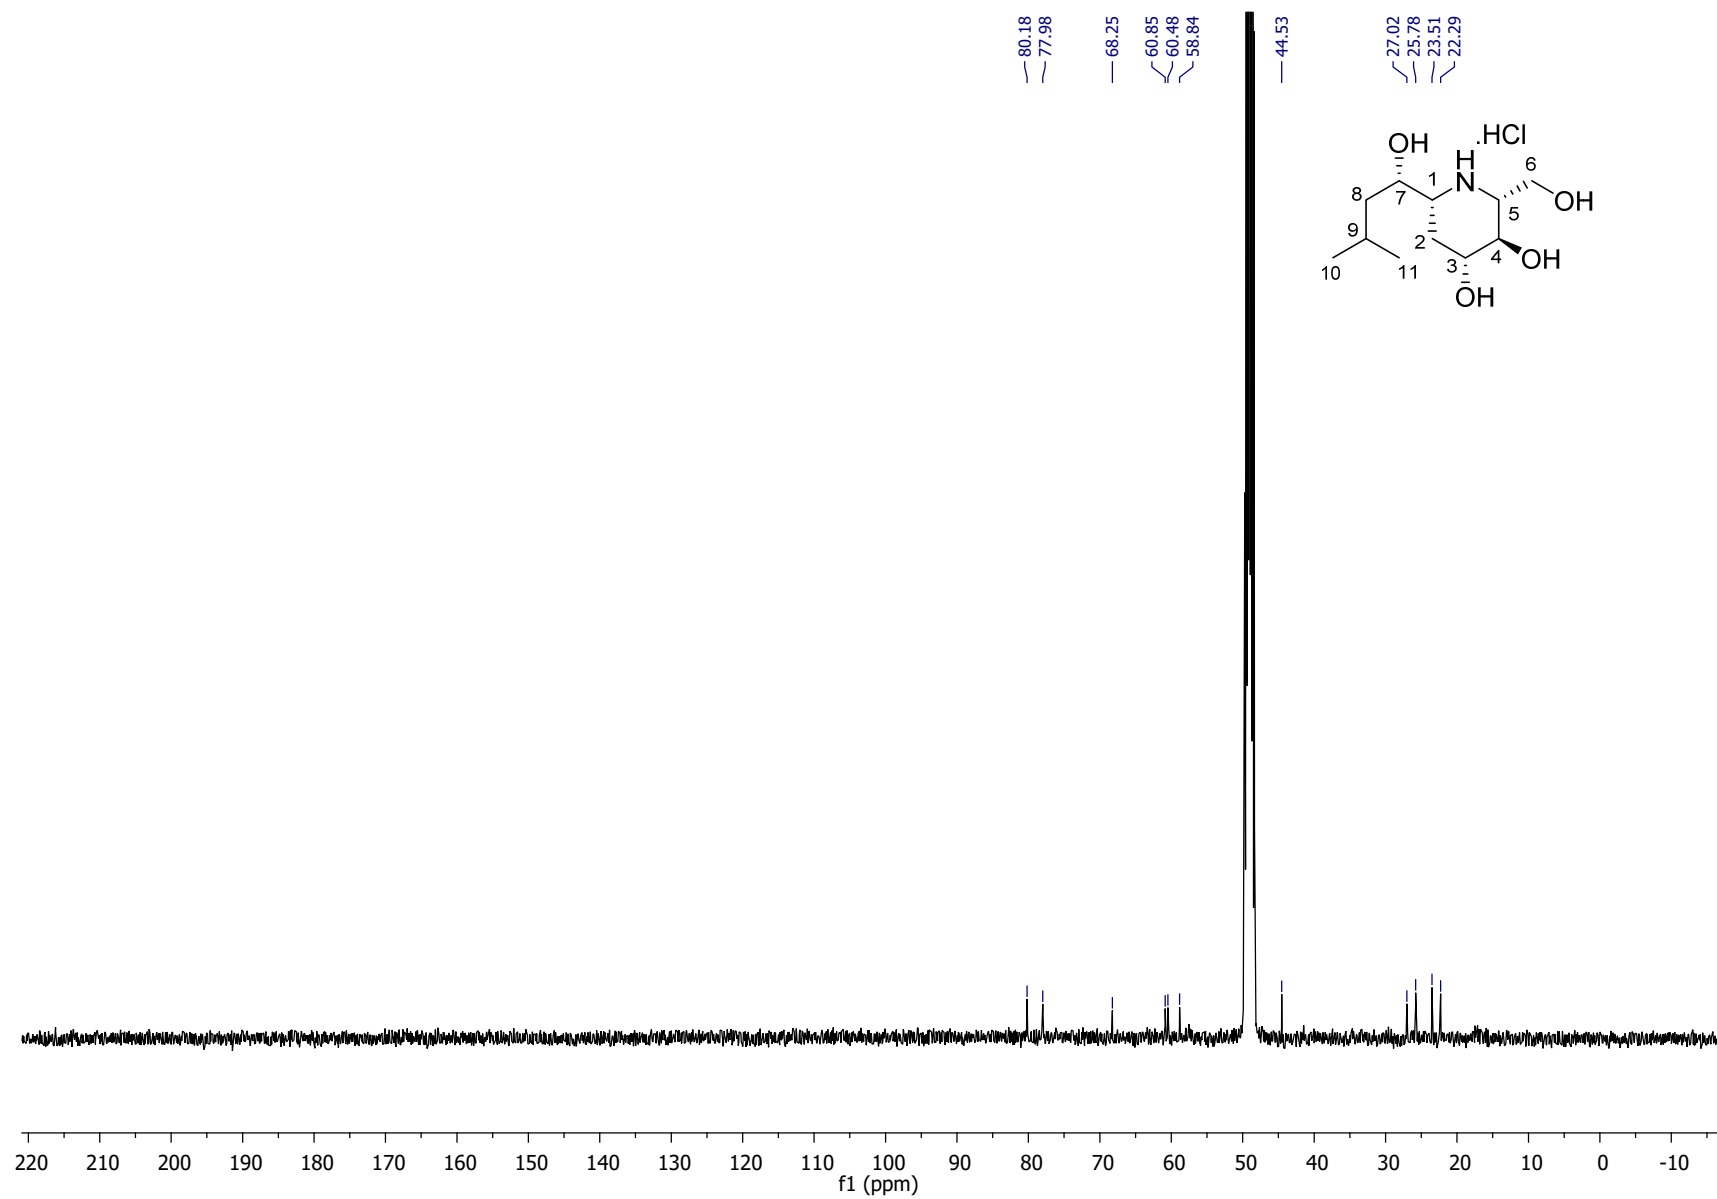

$^1\text{H}$  NMR of compound **35** (400 MHz,  $\text{CD}_3\text{OD}$ , 300K)

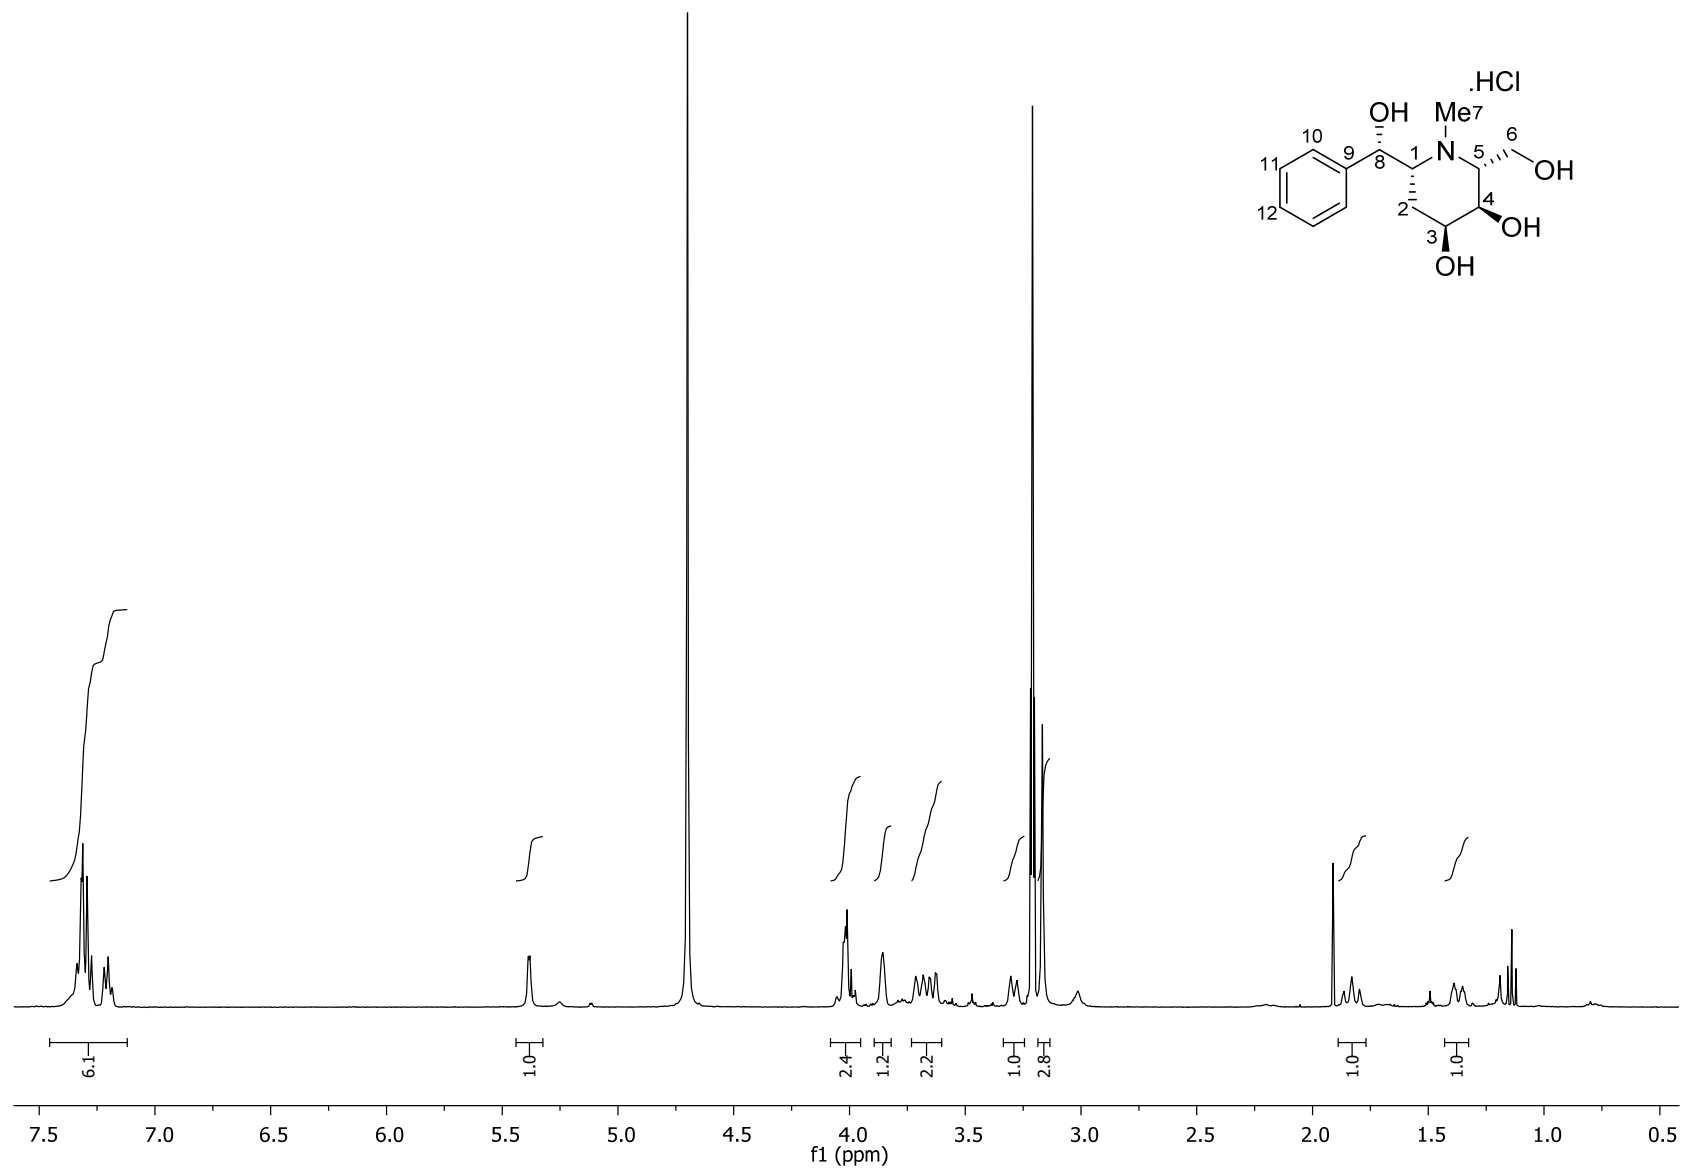

$^{13}\text{C}$  NMR of compound **35** (100 MHz,  $\text{CD}_3\text{OD}$ , 300K)

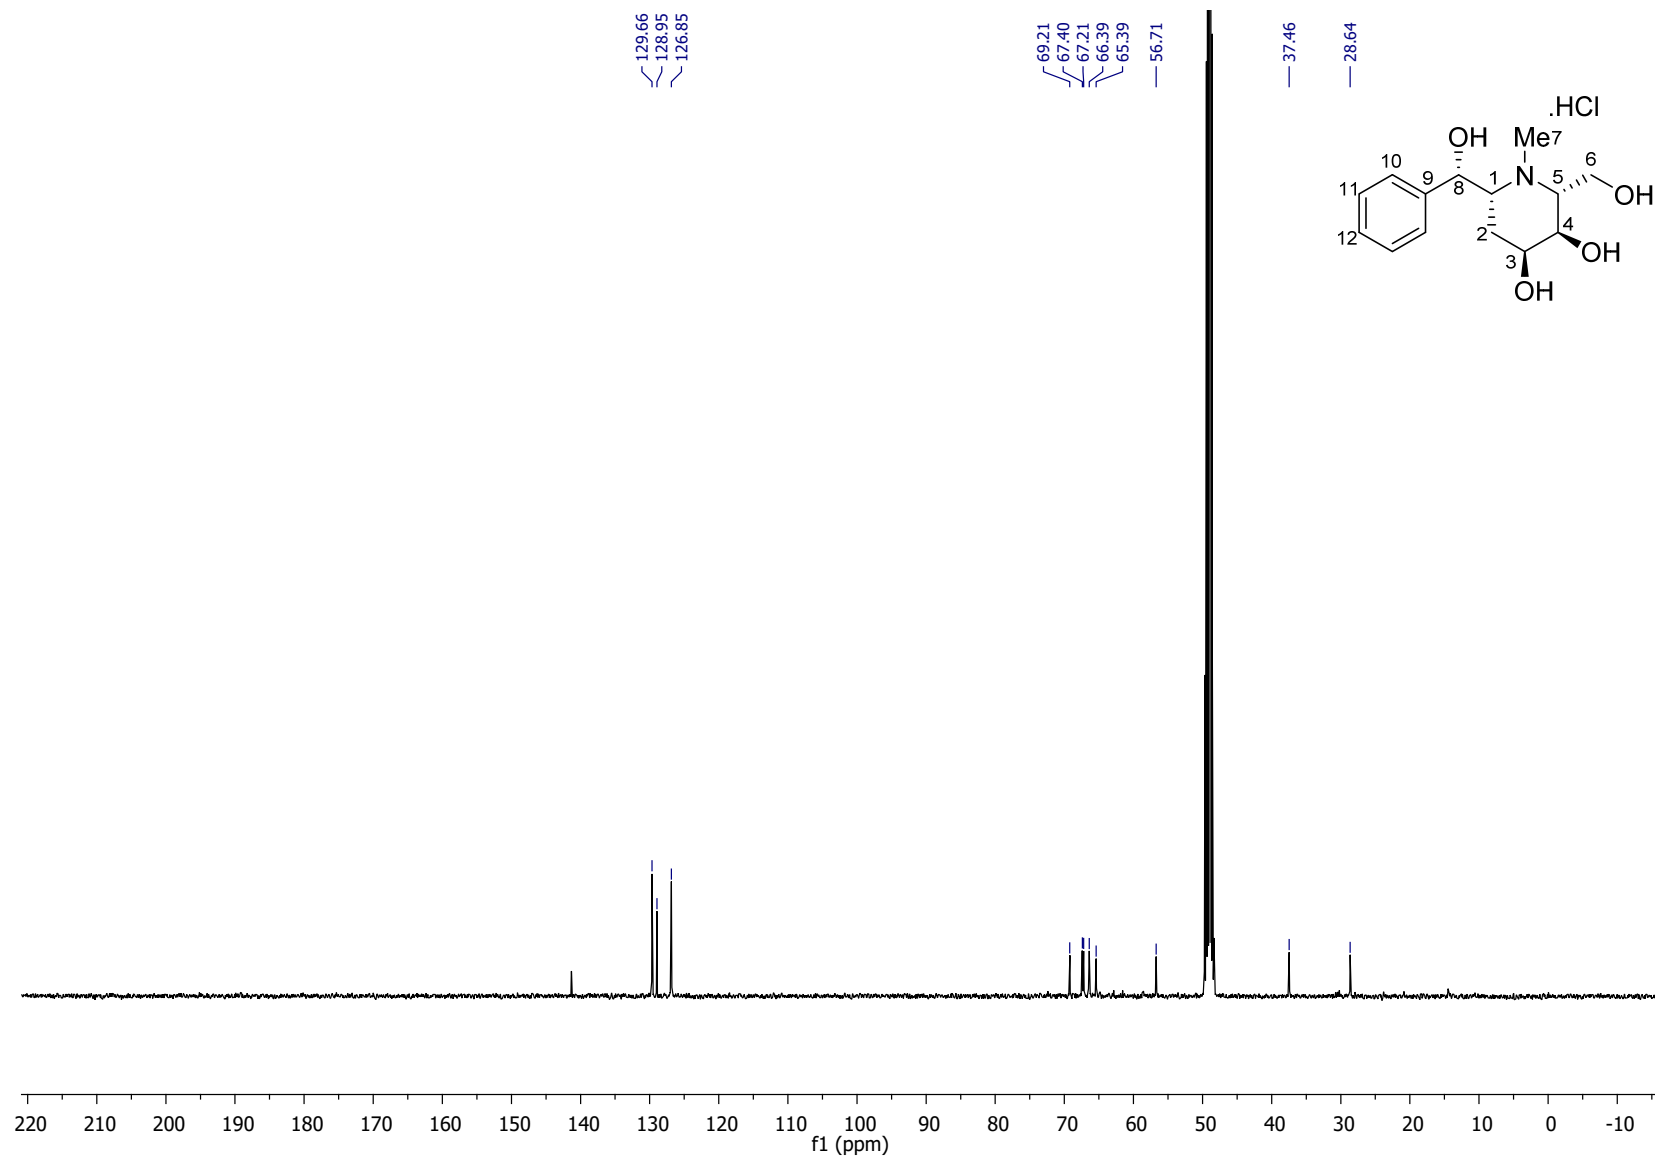

## II- Dixon and Lineweaver-Burk plots for $K_i$ determination

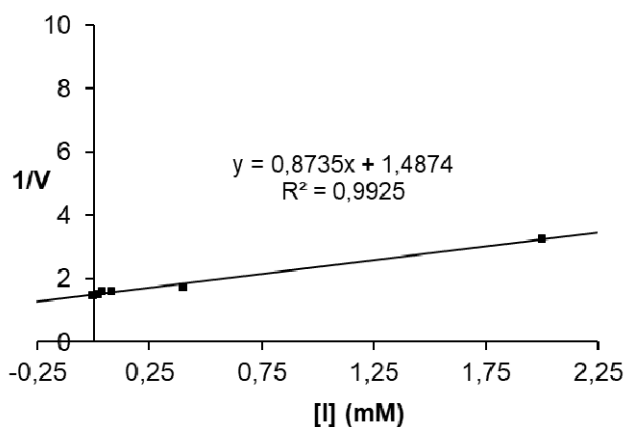

Figure S1. Dixon Plot for  $K_i$  determination ( $473 \pm 50 \mu\text{M}$ ) of **23** against *bovine liver*  $\beta$ -galactosidase.

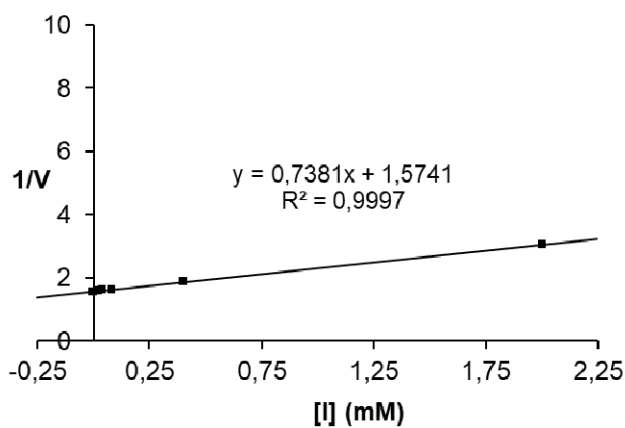

Figure S2. Dixon Plot for  $K_i$  determination ( $652 \pm 55 \mu\text{M}$ ) of **24** against *bovine liver*  $\beta$ -galactosidase.

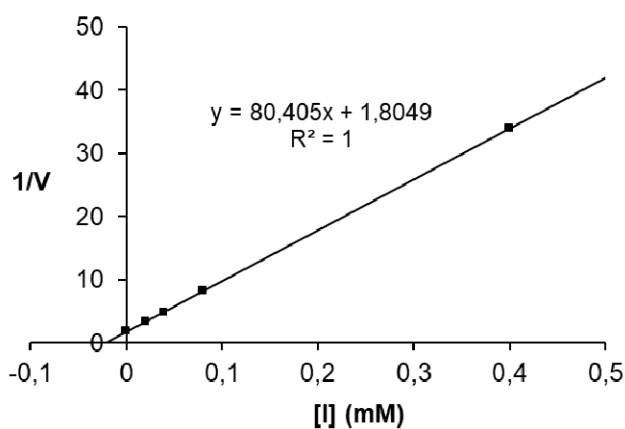

Figure S3. Dixon Plot for  $K_i$  determination ( $10 \pm 0,2 \mu\text{M}$ ) of **25** against *bovine liver*  $\beta$ -galactosidase.



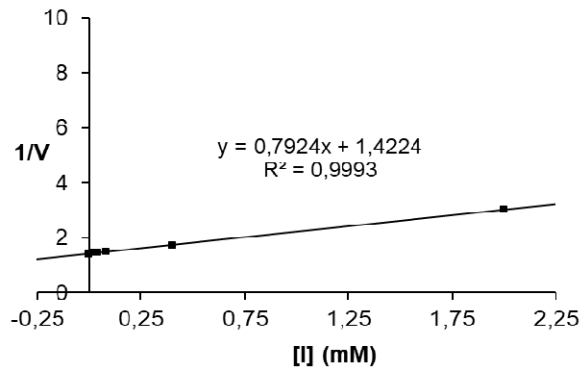

Figure S4. Dixon Plot for  $K_i$  determination ( $475 \pm 45 \mu\text{M}$ ) of **33** against bovine liver  $\beta$ -galactosidase.

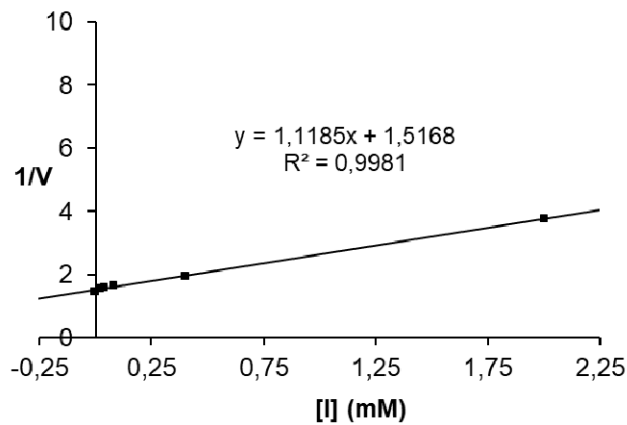

Figure S5. Dixon Plot for  $K_i$  determination ( $301 \pm 25 \mu\text{M}$ ) of **26** against bovine liver  $\beta$ -galactosidase.

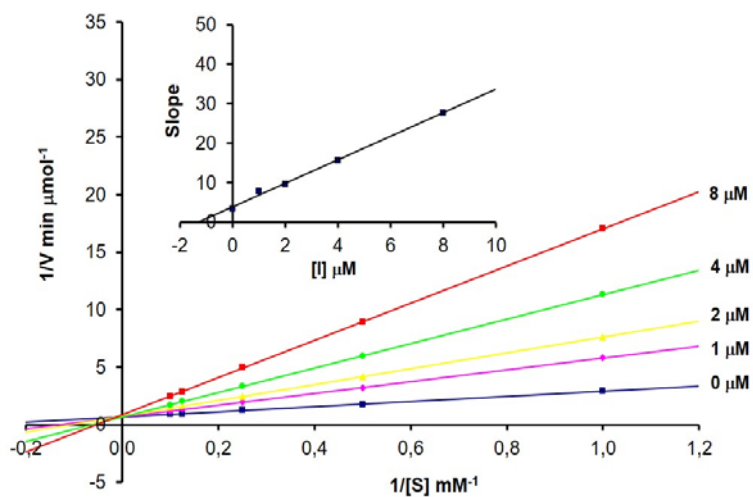

Figure S6. Lineweaver-Burk Plot for  $K_i$  determination ( $1.3 \pm 0.1 \mu\text{M}$ ) of **27** against bovine liver  $\beta$ -galactosidase/ $\beta$ -glucosidase.

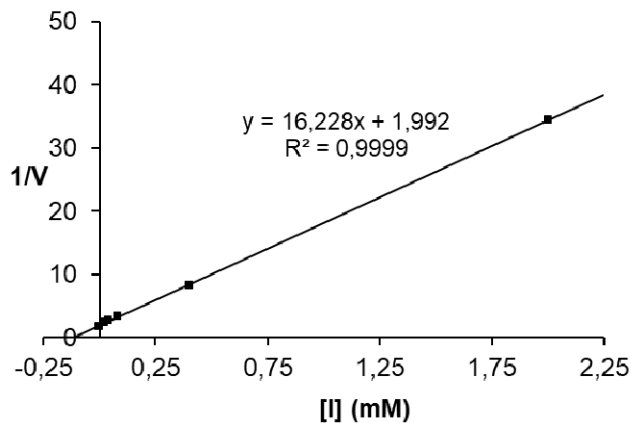

**Figure S7.** Dixon Plot for  $K_i$  determination ( $42 \pm 4 \mu\text{M}$ ) of **28** against *bovine liver*  $\beta$ -galactosidase/ $\beta$ -glucosidase.

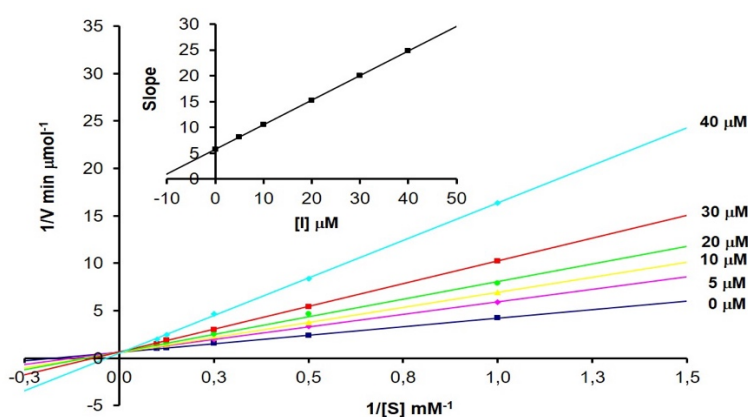

**Figure S8.** Lineweaver-Burk Plot for  $K_i$  determination ( $12.1 \pm 2 \mu\text{M}$ ) of **29** against *bovine liver*  $\beta$ -galactosidase/ $\beta$ -glucosidase.

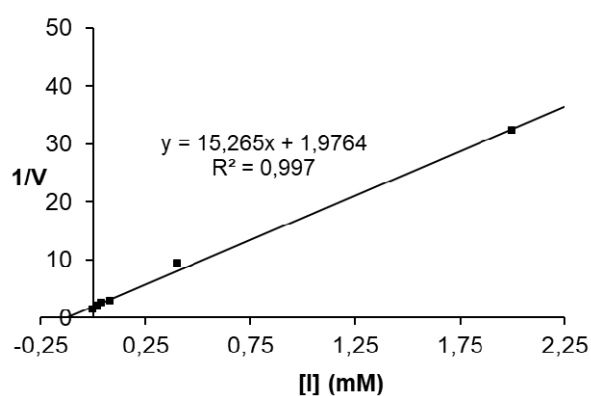

**Figure S9.** Dixon Plot for  $K_i$  determination ( $58 \pm 6 \mu\text{M}$ ) of **30** against *bovine liver*  $\beta$ -galactosidase.

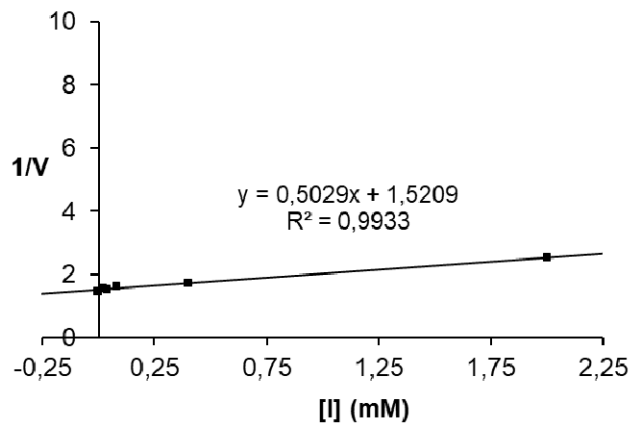

Figure S10. Dixon Plot for  $K_i$  determination ( $594 \pm 60 \mu\text{M}$ ) of **34** against *bovine liver*  $\beta$ -galactosidase.

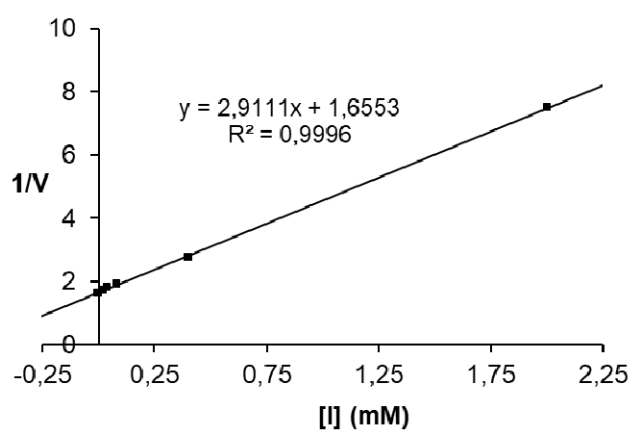

Figure S11. Dixon Plot for  $K_i$  determination ( $195 \pm 20 \mu\text{M}$ ) of **35** against *bovine liver*  $\beta$ -galactosidase.

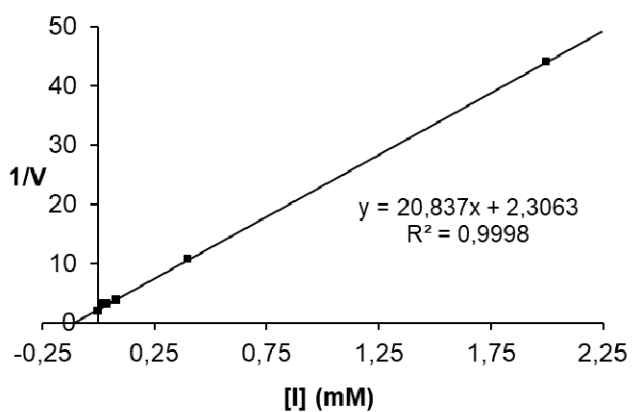

Figure S12. Dixon Plot for  $K_i$  determination ( $46 \pm 3 \mu\text{M}$ ) of **24** against *almonds*  $\beta$ -glucosidase.

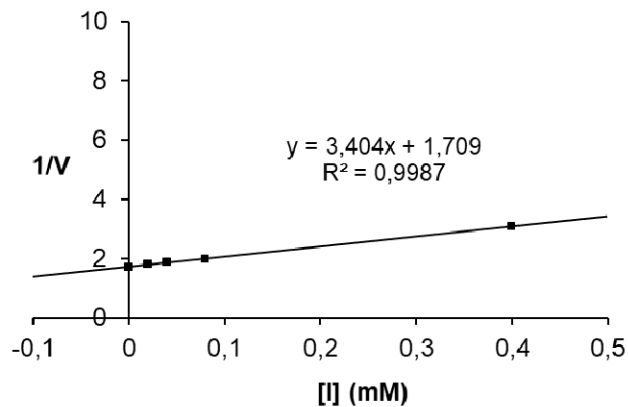

Figure S13. Dixon Plot for  $K_i$  determination ( $252 \pm 20 \mu\text{M}$ ) of **25** against *almonds*  $\beta$ -glucosidase.

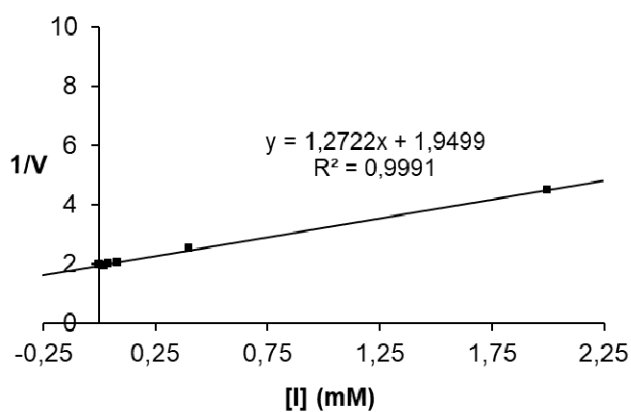

Figure S14. Dixon Plot for  $K_i$  determination ( $693 \pm 65 \mu\text{M}$ ) of **26** against *almonds*  $\beta$ -glucosidase.

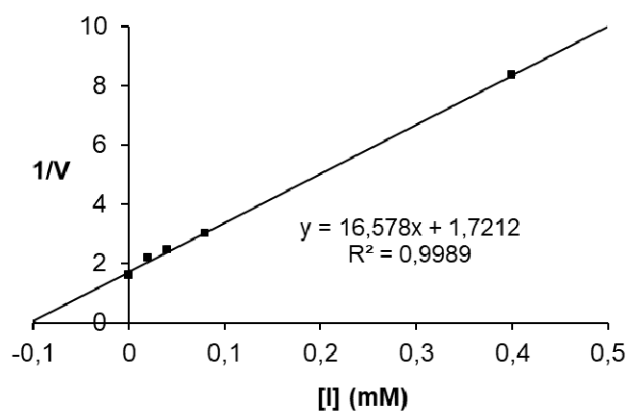

Figure S15. Dixon Plot for  $K_i$  determination ( $36 \pm 4 \mu\text{M}$ ) of **27** against *almonds*  $\beta$ -glucosidase.

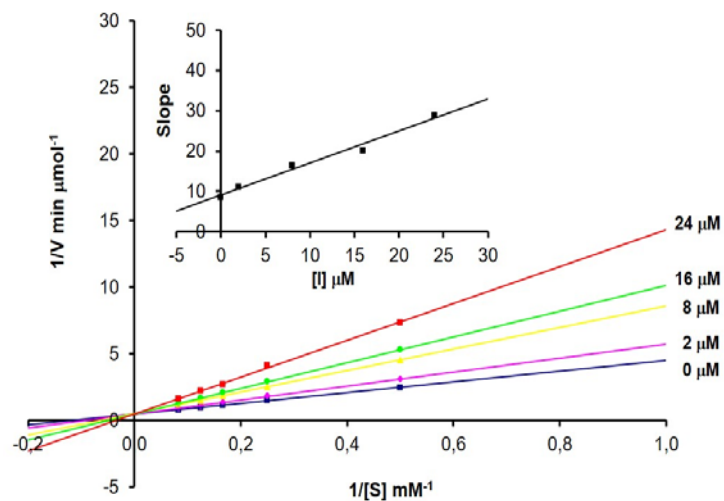

Figure S16. Lineweaver-Burk Plot for  $K_i$  determination ( $11.4 \pm 2 \mu\text{M}$ ) of **28** against *almonds*  $\beta$ -glucosidase.

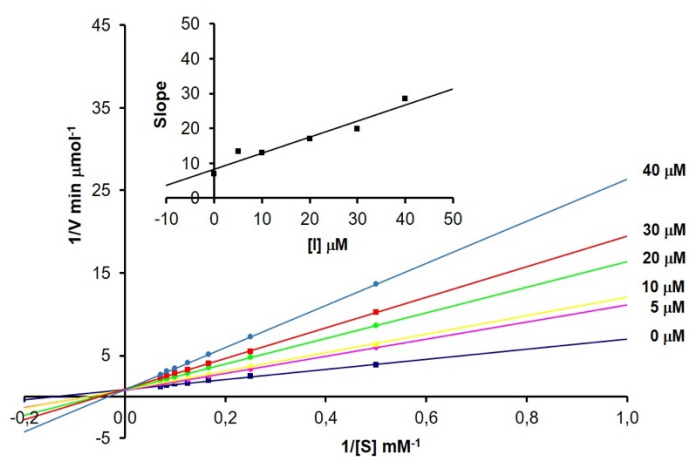

Figure S17. Lineweaver-Burk Plot for  $K_i$  determination ( $18 \pm 2 \mu\text{M}$ ) of **29** against *almonds*  $\beta$ -glucosidase.

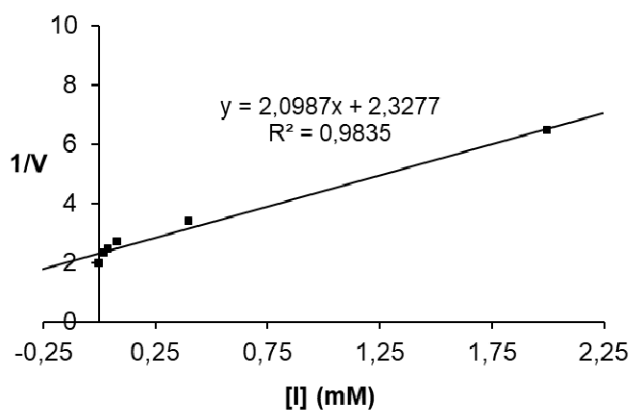

Figure S18. Dixon Plot for  $K_i$  determination ( $436 \pm 41 \mu\text{M}$ ) of **30** against *almonds*  $\beta$ -glucosidase.

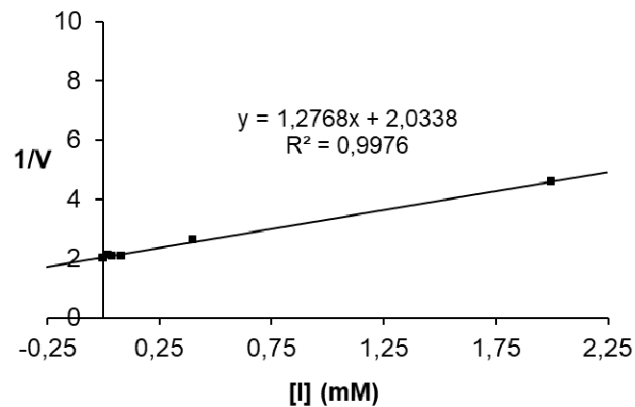

Figure S19. Dixon Plot for  $K_i$  determination ( $537 \pm 50 \mu\text{M}$ ) of **34** against *almonds*  $\beta$ -glucosidase.

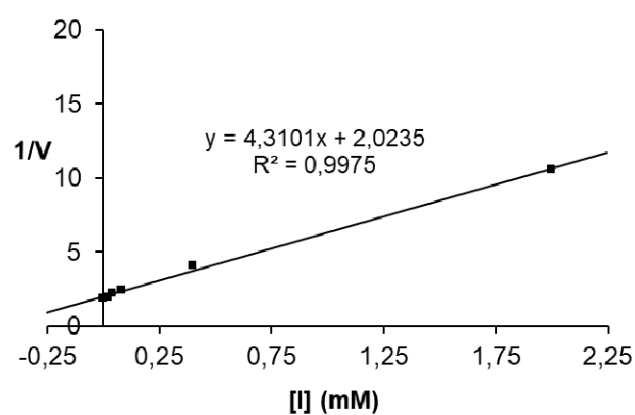

Figure S20. Dixon Plot for  $K_i$  determination ( $140 \pm 11 \mu\text{M}$ ) of **35** against *almonds*  $\beta$ -glucosidase.

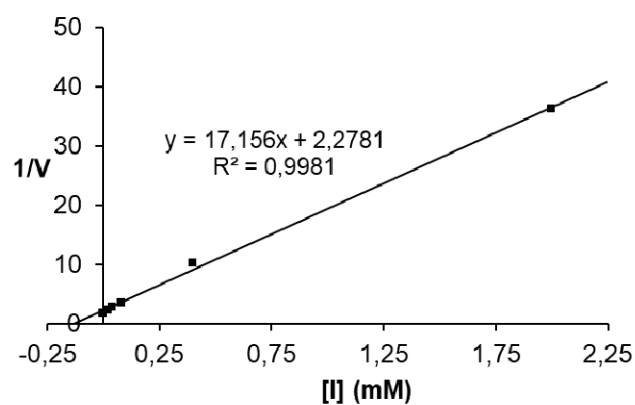

Figure S21. Dixon Plot for  $K_i$  determination ( $33 \pm 3 \mu\text{M}$ ) of **23** against *green coffee beans*  $\alpha$ -galactosidase.

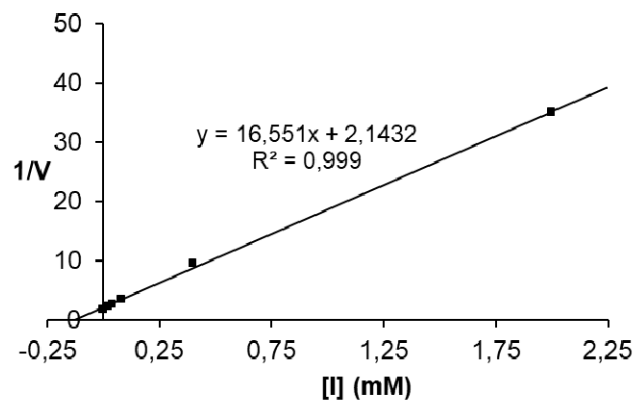

**Figure S22.** Dixon Plot for  $K_i$  determination ( $36 \pm 5 \mu\text{M}$ ) of **24** against green coffee beans  $\alpha$ -galactosidase.

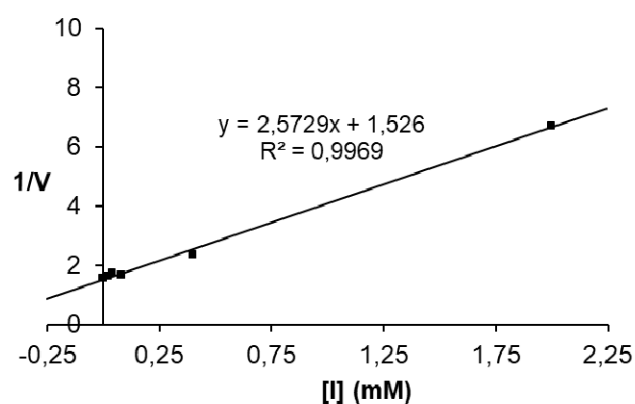

**Figure S23.** Dixon Plot for  $K_i$  determination ( $313 \pm 28 \mu\text{M}$ ) of **25** against green coffee beans  $\alpha$ -galactosidase.

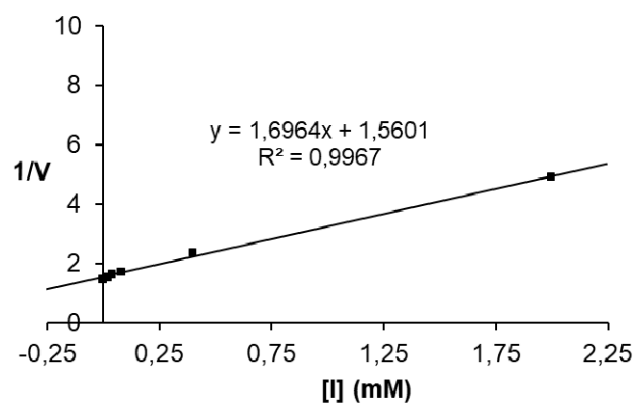

**Figure S24.** Dixon Plot for  $K_i$  determination ( $223 \pm 20 \mu\text{M}$ ) of **33** against green coffee beans  $\alpha$ -galactosidase.

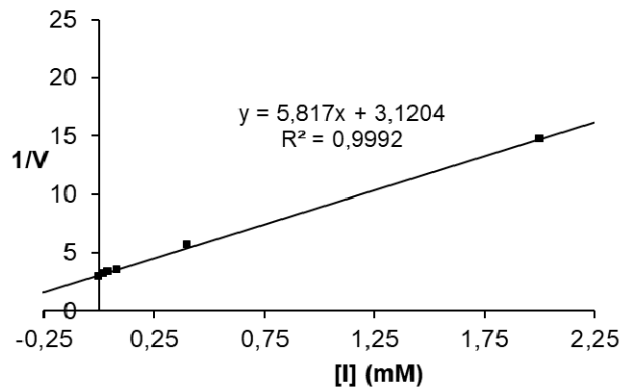

**Figure S25.** Dixon Plot for  $K_i$  determination ( $153 \pm 12 \mu\text{M}$ ) of **24** against *Aspergillus niger* amyloglucosidase.

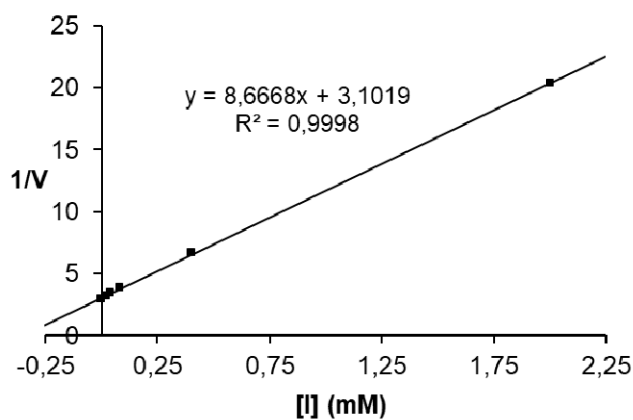

**Figure S26.** Dixon Plot for  $K_i$  determination ( $116 \pm 10 \mu\text{M}$ ) of **26** against *Aspergillus niger* amyloglucosidase.

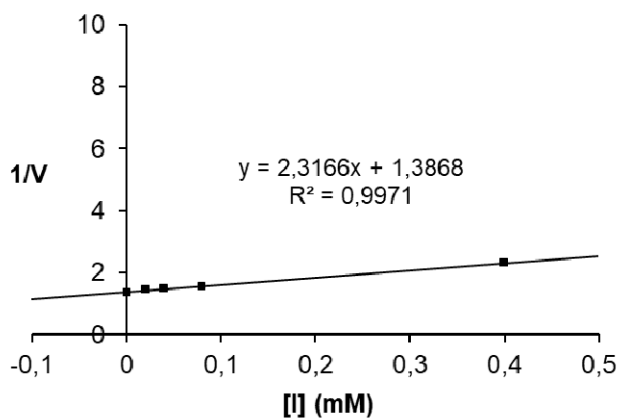

**Figure S27.** Dixon Plot for  $K_i$  determination ( $463 \pm 40 \mu\text{M}$ ) of **27** against *Aspergillus niger* amyloglucosidase.



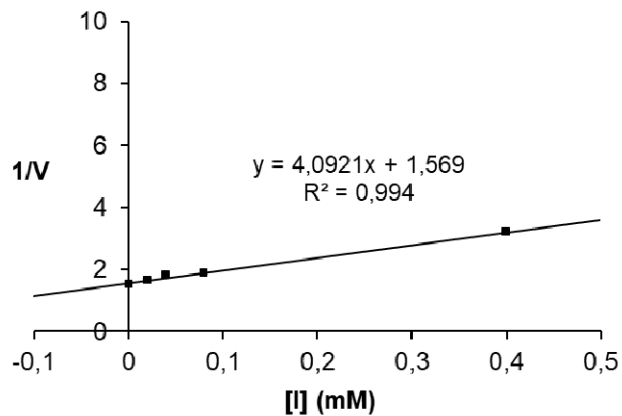

**Figure S28.** Dixon Plot for  $K_i$  determination ( $169 \pm 15 \mu\text{M}$ ) of **28** against *Aspergillus niger* amyloglucosidase.

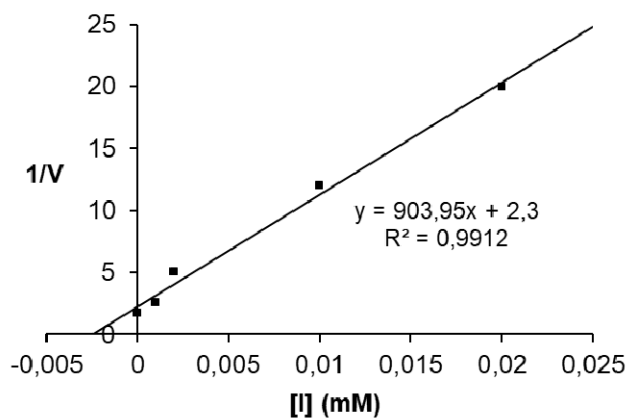

**Figure S29.** Dixon Plot for  $K_i$  determination ( $1.4 \pm 0.1 \mu\text{M}$ ) of **34** against *Aspergillus niger* amyloglucosidase.

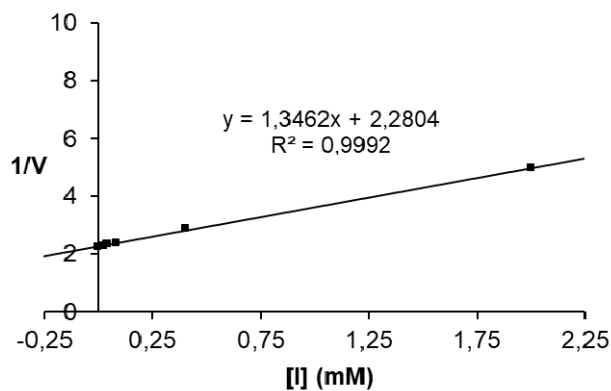

**Figure S30.** Dixon Plot for  $K_i$  determination ( $550 \pm 45 \mu\text{M}$ ) of **35** against *Aspergillus niger* amyloglucosidase.

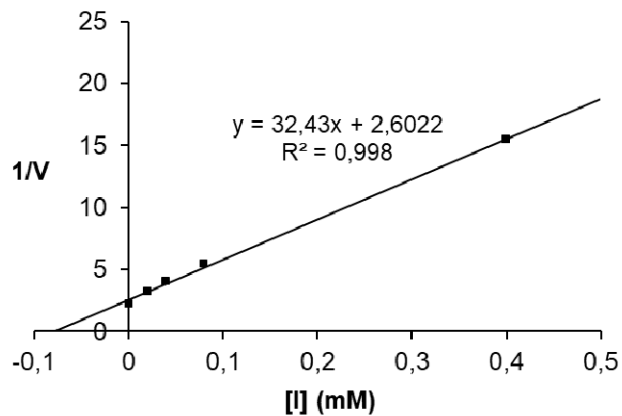

**Figure S31.** Dixon Plot for  $K_i$  determination ( $22.8 \pm 1.9 \mu\text{M}$ ) of **32** against *Aspergillus niger* amyloglucosidase.

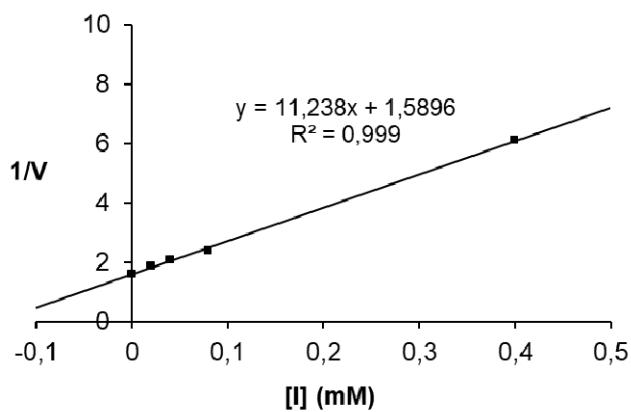

**Figure S32.** Dixon Plot for  $K_i$  determination ( $115 \pm 10 \mu\text{M}$ ) of **25** against *Penicillium decumbes* naringinase.

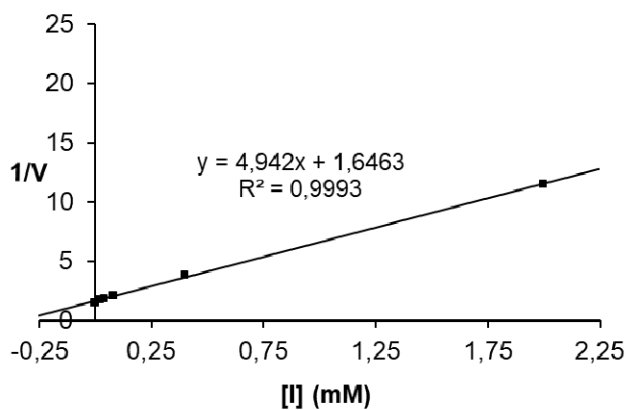

**Figure S33.** Dixon Plot for  $K_i$  determination ( $76 \pm 5 \mu\text{M}$ ) of **26** against *Penicillium decumbes* naringinase.

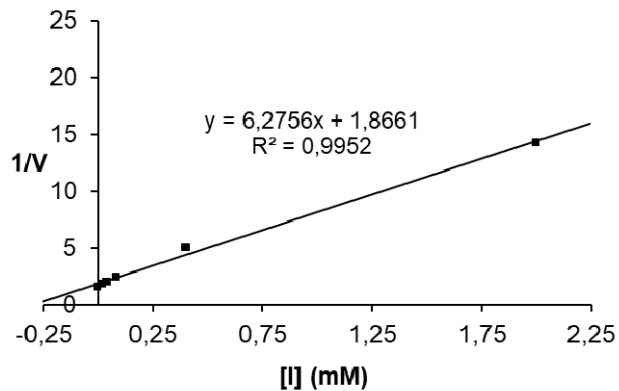

**Figure S34.** Dixon Plot for  $K_i$  determination ( $131 \pm 11 \mu\text{M}$ ) of **27** against *Penicilium decumbes* naringinase.

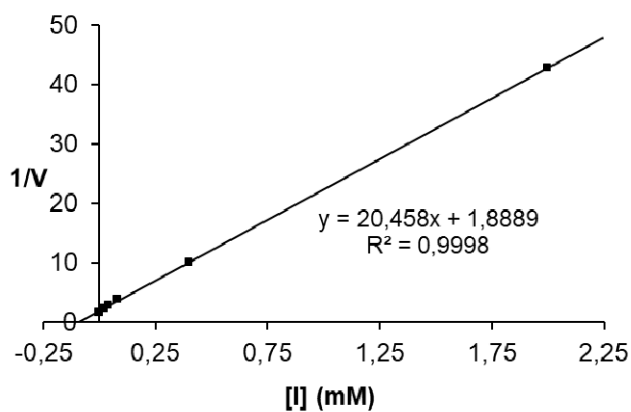

**Figure S35.** Dixon Plot for  $K_i$  determination ( $45 \pm 3 \mu\text{M}$ ) of **28** against *Penicilium decumbes* naringinase.

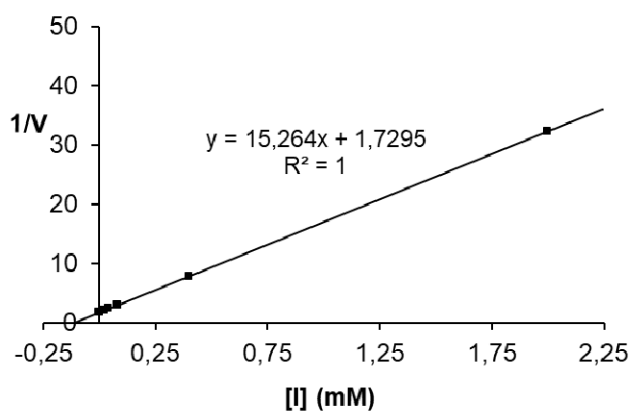

**Figure S36.** Dixon Plot for  $K_i$  determination ( $50 \pm 4 \mu\text{M}$ ) of **29** against *Penicilium decumbes* naringinase.

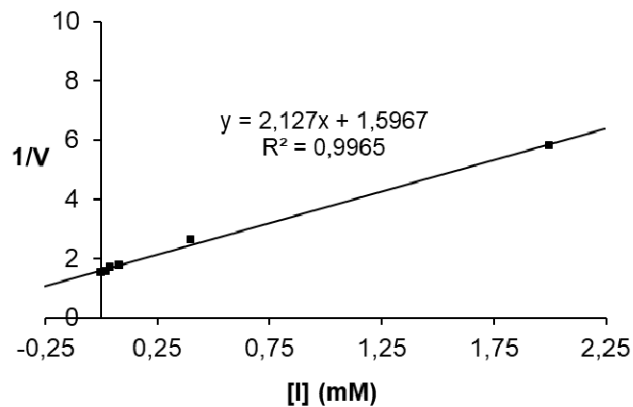

Figure S37. Dixon Plot for  $K_i$  determination ( $224 \pm 20 \mu\text{M}$ ) of **30** against *Penicillium decumbes* naringinase.

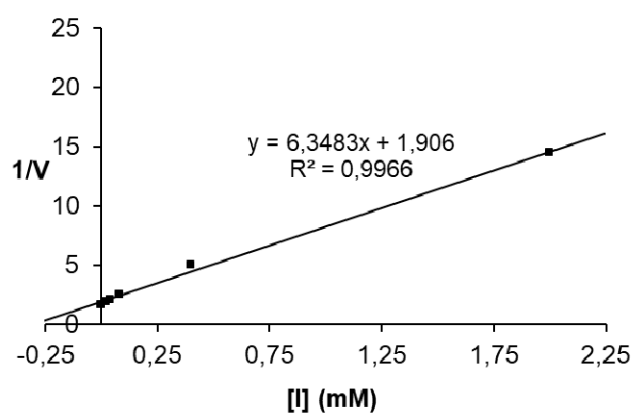

Figure S38. Dixon Plot for  $K_i$  determination ( $67 \pm 5 \mu\text{M}$ ) of **34** against *Penicillium decumbes* naringinase.

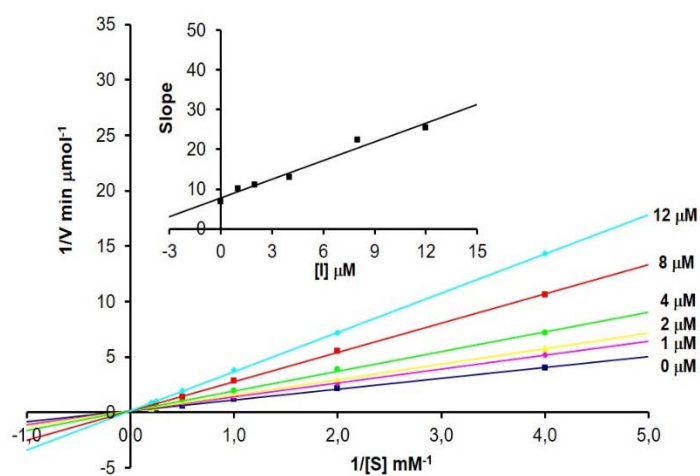

Figure S39. Lineweaver-Burk Plot for  $K_i$  determination ( $4.9 \pm 0.5 \mu\text{M}$ ) of **35** against *Penicillium decumbes* naringinase.

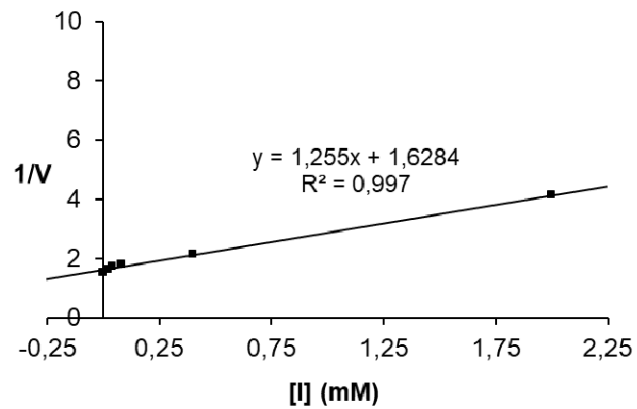

**Figure S40.** Dixon Plot for  $K_i$  determination ( $272 \pm 25 \mu\text{M}$ ) of **32** against *Penicilium decumbes* naringinase.
